# Supplementary material
Source: MDPI journal article supplement (https://www.mdpi.com/2071-1050/16/8/3487)
Supplement: s1 [file s1]

Archive with 7 entries (7 files):
- FigureS11.jpg
- File S1.pdf
- TableS1.xlsx
- TableS2.xlsx
- TableS3.xlsx
- TableS4.xlsx
- TableS5.xlsx
