# Supplementary material
Source: MDPI journal article supplement (https://www.mdpi.com/2071-1050/16/8/3487)
Supplement: s1 [file s1 › TableS1.xlsx]

## Sheet: LCI
	The LCI is presented for both, 1 m2 and the whole pitch. The data is separated so that the LCI for a different pitch size can be calculated easily. The sources of the process steps are given e.g. Itten. The sources are discussed in the maintext and listed here again for the sake of completeness.
	Itten	https://digitalcollection.zhaw.ch/bitstream/11475/20774/3/2020_Itten-Glauser-Stucki_Oekobilanzierung-Rasensportfelder.pdf
	Russo	10.1016/j.eiar.2022.106800
	Magnusson	10.1016/j.resconrec.2017.03.007
	Itten, construction of the groundlayer, earth works
			NT	AT			Ecoinvent process used for modelling:					Pitch size
	Flow	Unit	Drain-Layer	Wood	ELT	EPDM						7420	m2
	Quicklime	kg per m2	/	8.09	8.09	8.09	market for quicklime, milled, packed | quicklime, milled, packed | Cutoff, S - RER
	Quicklime	t per pitch	/	60.0278	60.0278	60.0278
	Diesel	MJ / m2	18.1	24	24	24	diesel, burned in building machine | diesel, burned in building machine | Cutoff, S - GLO
	Diesel	GJ / m2	/	178.08	178.08	178.08
	Biowaste	kg / m2	35	35	35	35	treatment of biowaste by anaerobic digestion | biowaste | Cutoff, S - RoW
	Biowaste	t / m2	259.7	259.7	259.7	259.7
	Itten & Russo, construction of the piping, 50/50 PP/PE
			NT	AT			Ecoinvent process used for modelling:
	Flow	Unit	Drain-Layer	Wood	ELT	EPDM
	HDPE	kg per m2	0.216	0.216	0.216	0.216	market for polyethylene, high density, granulate | polyethylene, high density, granulate | Cutoff, S - GLO
	HDPE	t per pitch	1.60272	1.60272	1.60272	1.60272
	PP	kg per m2	0.216	0.216	0.216	0.216	market for polypropylene, granulate | polypropylene, granulate | Cutoff, S - GLO
	PP	t per pitch	1.60272	1.60272	1.60272	1.60272
	Extrusion	kg / m2	0.431	0.431	0.431	0.431	extrusion, plastic pipes | extrusion, plastic pipes | Cutoff, S - RER
	Extrusion	t / m2	3.19802	3.19802	3.19802	3.19802
	Concrete	m3 / m2	8.29e-05	8.29e-05	8.29e-05	8.29e-05	market for concrete, normal strength | concrete, normal strength | Cutoff, S - RoW
	Concrete	m3 / pitch	0.615118	0.615118	0.615118	0.615118
	Gravel	kg / m2	162	162	162	162	market for gravel, round | gravel, round | Cutoff, S - RoW
	Gravel	t / pitch	1202.04	1202.04	1202.04	1202.04
	Diesel	MJ / m2	15	15	15	15	diesel, burned in building machine | diesel, burned in building machine | Cutoff, S - GLO
	Diesel	GJ / m2	111.3	111.3	111.3	111.3
	Itten, Construction of the drainage layer
			NT	AT			Ecoinvent process used for modelling:
	Flow	Unit	Drain-Layer	Wood	ELT	EPDM
	Sand	kg per m2	202	0	0	0	market for sand | sand | Cutoff, S - RoW
	Sand	t per pitch	1498.84	0	0	0
	Diesel	MJ / m2	6.78	0	0	0	diesel, burned in building machine | diesel, burned in building machine | Cutoff, S - GLO
	Diesel	GJ / m2	50.3076	0	0	0
	Itten, construction of the base layer
			NT	AT			Ecoinvent process used for modelling:
	Flow	Unit	Drain-Layer	Wood	ELT	EPDM
	Sand	kg per m2	0	34.9	34.9	34.9	market for sand | sand | Cutoff, S - RoW
	Sand	t per pitch	0	258.958	258.958	258.958
	Silica Sand	kg per m2	194	0	0	0	market for silica sand | silica sand | Cutoff, S - GLO
	Silica Sand	t per pitch	1439.48	0	0	0
	Limestone	kg / m2	21.6	0	0	0	limestone production, crushed, washed | limestone, crushed, washed | Cutoff, S - RoW
	Limestone	t / m2	160.272	0	0	0
	Gravel	kg / m2	0	465	465	465	market for gravel, crushed | gravel, crushed | Cutoff, S - RoW
	Gravel	t / pitch	0	3450.3	3450.3	3450.3
	Mastic Asphalt	kg / m2	8.29e-05	115	115	115	mastic asphalt production | mastic asphalt | Cutoff, S - RoW
	Mastic Asphalt	t / pitch	0	853.3	853.3	853.3
	Concrete Block	kg / m2	0	1.08	1.08	1.08	concrete block production | concrete block | Cutoff, S - RoW
	Concrete Block	t / pitch	0	8.0136	8.0136	8.0136
	Diesel	MJ / m2	0	7.26	10.7	10.7	diesel, burned in building machine | diesel, burned in building machine | Cutoff, S - GLO
	Diesel	GJ / m2	0	53.8692	79.394	79.394
	Itten, construction of the base layer
			NT	AT			Ecoinvent process used for modelling:
	Flow	Unit	Drain-Layer	Wood	ELT	EPDM
	Synthetic Rubber	kg per m2	0	13.5	13.5	13.5	market for synthetic rubber | synthetic rubber | Cutoff, S - GLO
	Synthetic Rubber	t per pitch	0	100.17	100.17	100.17
	PU	kg per m2	0	0.202	0.202	0.202	market for polyurethane, flexible foam | polyurethane, flexible foam | Cutoff, S - RER
	PU	t per pitch	0	1.49884	1.49884	1.49884
	Diesel	MJ / m2	0	5.52	5.52	5.52	diesel, burned in building machine | diesel, burned in building machine | Cutoff, S - GLO
	Diesel	GJ / m2	0	40.9584	40.9584	40.9584
	Itten, Magnusson & Russo, construction of artificial or natural grass
			NT	AT			Ecoinvent process used for modelling:
	Flow	Unit	Drain-Layer	Wood	ELT	EPDM
	Grass seed	kg per m2	0.0296	0	0	0	market for grass seed, organic, for sowing | grass seed, organic, for sowing | Cutoff, S - GLO
	Grass seed	t per pitch	0.219632	0	0	0
	Nitrogen Fertiliser	kg per m2	0.018	0	0	0	market for inorganic nitrogen fertiliser, as N | inorganic nitrogen fertiliser, as N | Cutoff, S - NO
	Nitrogen Fertiliser	t per pitch	0.13356	0	0	0
	Potassium Fertiliser	kg per m2	0.01	0	0	0	market for inorganic potassium fertiliser, as K2O | inorganic potassium fertiliser, as K2O | Cutoff, S - NO
	Potassium Fertiliser	t per pitch	0.0742	0	0	0
	Phopshate Fertilizer	kg per m2	0.01	0	0	0	market for inorganic phosphorus fertiliser, as P2O5 | inorganic phosphorus fertiliser, as P2O5 | Cutoff, S - NO
	Phopshate Fertilizer	t per pitch	0.0742	0	0	0
	Irrigation	m3 / m2	0.27	0	0	0	irrigation, sprinkler | irrigation | Cutoff, S - DE
	Irrigation	m3 / pitch	2003.4	0	0	0
	Synthethic Turf	kg per m2	0	0.25	0.25	0.25	polyethylene production, high density, granulate | polyethylene, high density, granulate | Cutoff, S - RER				50/50, see full text
	Synthethic Turf	t per pitch	0	1.855	1.855	1.855	polypropylene production, granulate | polypropylene, granulate | Cutoff, S - RER
	Infill	kg per m2	0	5	6.47	6	See extra sheets
	Infill	t per pitch	0	37.1	48.0074	44.52
	Silica Sand	kg per m2	0	18	18	18	market for silica sand | silica sand | Cutoff, S - GLO
	Silica Sand	t per pitch	0	133.56	133.56	133.56
	Diesel	MJ / m2	5.81	2.9	2.9	2.9	diesel, burned in building machine | diesel, burned in building machine | Cutoff, S - GLO
	Diesel	GJ / m2	43.1102	21.518	21.518	21.518
	Ammonia Emission to Air	kg / m2	0.004	0	0	0	Ammonia, NO - Emission to air/unspecified
	Ammonia Emission to Air	t per pitch	0.02968	0	0	0
	NO2 Emission to Air	kg / m2	0.000194	0	0	0	Dinitrogen monoxide, Emission to air/unspecified
	NO2 Emission to Air	t per pitch	0.00143948	0	0	0
	N2O Emission to Air	kg / m2	0.000923	0	0	0	Nitrate, Emission to water/unspecified
	N2O Emission to Air	t per pitch	0.00684866	0	0	0
	Nitrate Emission to water	kg / m2	0.0471	0	0	0	Emission to water/unspecified
	Nitrate Emission to water	t per pitch	0.349482	0	0	0
	Phosphate Emission to water	kg / m2	1.5e-06	0	0	0	Phosphate, NO Emission to water/unspecified
	Phosphate Emission to water	t per pitch	1.113e-05	0	0	0
	Itten, Infrastructure: Irrigation, lights, fence and mowing edges
			NT	AT			Ecoinvent process used for modelling:
	Flow	Unit	Drain-Layer	Wood	ELT	EPDM
	HDPE	kg per m2	0.175	0.175	0.175	0.175	market for polyethylene, high density, granulate | polyethylene, high density, granulate | Cutoff, S - GLO
	HDPE	t per pitch	1.2985	1.2985	1.2985	1.2985
	PP Granulate	kg per m2	0.0903	0.0903	0.0903	0.0903	market for polypropylene, granulate | polypropylene, granulate | Cutoff, S - GLO
	PP Granulate	t per pitch	0.670026	0.670026	0.670026	0.670026
	Extrusion Plastic Pipes	kg per m2	0.265	0.265	0.265	0.265	market for extrusion, plastic pipes | extrusion, plastic pipes | Cutoff, S - GLO
	Extrusion Plastic Pipes	t per pitch	1.9663	1.9663	1.9663	1.9663
	Concrete normal	m3 per m2	0.01	0.01	0.01	0.01	market for concrete, normal strength | concrete, normal strength | Cutoff, S - AT
	Concrete normal	m3 per pitch	74.2	74.2	74.2	74.2
	Concrete high exacting	m3 / m2	0.00404	0.00404	0.00404	0.00404
	Concrete high exacting	m3 / pitch	29.9768	29.9768	29.9768	29.9768
	Concrete total	m3 per m2	0.01404	0.01404	0.01404	0.01404
	Concrete Block	kg per m2	2.16	0	0	0	concrete block production | concrete block | Cutoff, S - DE
	Concrete Block	t per pitch	16.0272	0	0	0
	Steel, Low-Alloyed	kg per m2	0.606	0.606	0.606	0.606	market for steel, low-alloyed | steel, low-alloyed | Cutoff, S - GLO
	Steel, Low-Alloyed	t per pitch	4.49652	4.49652	4.49652	4.49652
	Electronic Component	kg per m2	0.00809	0.00809	0.00809	0.00809	electronic component production, passive, unspecified | electronic component, passive, unspecified | Cutoff, S - GLO
	Electronic Component	t per pitch	0.0600278	0.0600278	0.0600278	0.0600278
	Aluminium, Primary, Ingot	kg per m2	0.0943	0.0943	0.0943	0.0943	aluminium production, primary, ingot | aluminium, primary, ingot | Cutoff, S - IAI Area, EU27 & EFTA
	Aluminium, Primary, Ingot	t per pitch	0.699706	0.699706	0.699706	0.699706
	Metal Working	kg / m2	0.0943	0.0943	0.0943	0.0943	metal working, average for aluminium product manufacturing | metal working, average for aluminium product manufacturing | Cutoff, S - RER
	Metal Working	t per pitch	0.699706	0.699706	0.699706	0.699706
	Reinforcing Steel	kg / m2	0.539	0.539	0.539	0.539	market for reinforcing steel | reinforcing steel | Cutoff, S - GLO
	Reinforcing Steel	t per pitch	3.99938	3.99938	3.99938	3.99938
	Diesel	MJ / m2	2.52	2.42	2.42	2.42	diesel, burned in building machine | diesel, burned in building machine | Cutoff, S - GLO
	Diesel	GJ / m2	18.6984	17.9564	17.9564	17.9564
	Itten, Renovation Natural turf, m2 per year						Data for 1 year. For the full impact value needs to be multiplied by 15
			NT	AT			Ecoinvent process used for modelling:
	Flow	Unit	Drain-Layer	Wood	ELT	EPDM
	Rolled Turf	m2 / m2	0.0667	0	0	0	Construction of natural gras, from line 68
	Rolled Turf	m2 / Pitch	494.914	0	0	0
	Diesel	MJ / m2	0.194	0	0	0	diesel, burned in building machine | diesel, burned in building machine | Cutoff, S - GLO
	Diesel	GJ / m2	1.43948	0	0	0
	Biowaste	kg /m2	1.46	0	0	0	treatment of biowaste by anaerobic digestion | biowaste | Cutoff, S - RoW
	Biowaste	t per pitch	10.8332	0	0	0
	Itten, Renovation Artificial turf, m2 per year						Data for 1 year. For the full life cycle, 20 is needed. 2 Renovations over 30 years
			NT	AT			Ecoinvent process used for modelling:
	Flow	Unit	Drain-Layer	Wood	ELT	EPDM
	Synthethic Turf	kg per m2	0	0.25	0.25	0.25	See Line 81 & 82
	Synthethic Turf	t per pitch	0	1.855	1.855	1.855
	Silica Sand	kg per m2	0	1.8	1.8	1.8	silica sand production | silica sand | Cutoff, S - RoW
	Silica Sand	t per pitch	0	13.356	13.356	13.356
	Diesel	MJ / m2	0	0.678	0.678	0.678	diesel, burned in building machine | diesel, burned in building machine | Cutoff, S - GLO
	Diesel	GJ / m2	0	5.03076	5.03076	5.03076
	Waste Plastic, Mix	kg /m2	0	0.25	0.25	0.25	treatment of waste plastic, mixture, municipal incineration | waste plastic, mixture | Cutoff, S - RoW
	Waste Plastic, Mix	t per pitch	0	1.855	1.855	1.855
	Itten, Demolition of a football pitch
			NT	AT			Ecoinvent process used for modelling:
	Flow	Unit	Drain-Layer	Wood	ELT	EPDM
	Diesel	MJ / m2	12.6	11.1	11.1	11.1	diesel, burned in building machine | diesel, burned in building machine | Cutoff, S - GLO
	Diesel	GJ / m2	93.492	82.362	82.362	82.362
	Inert Waste	kg /m2	216	0	0	0	treatment of inert waste, sanitary landfill | inert waste | Cutoff, S - Europe without Switzerland
	Inert Waste	t per pitch	1602.72	0	0	0
	Waste reinforced Concrete	kg /m2	10.5	33.7	33.7	33.7	market for waste reinforced concrete | waste reinforced concrete | Cutoff, S - Europe without Switzerland
	Waste reinforced Concrete	t per pitch	77.91	250.054	250.054	250.054
	Scrap Steel	kg /m2	0.876	0.876	0.876	0.876	market for scrap steel | scrap steel | Cutoff, S - Europe without Switzerland
	Scrap Steel	t per pitch	6.49992	6.49992	6.49992	6.49992
	Waste asphalt	kg /m2	0	115	115	115	treatment of waste asphalt, sanitary landfill | waste asphalt | Cutoff, S - RoW
	Waste asphalt	t per pitch	0	853.3	853.3	853.3
	Waste PE	kg /m2	0.216	0.216	0.216	0.216	market for waste polyethylene | waste polyethylene | Cutoff, S - NO
	Waste PE	t per pitch	1.60272	1.60272	1.60272	1.60272
	Waste PP	kg /m2	0.216	1.47	1.47	1.47	market for waste polypropylene | waste polypropylene | Cutoff, S - NO
	Waste PP	t per pitch	1.60272	10.9074	10.9074	10.9074
	Waste Concrete	kg /m2	205	337	337	337	market for waste concrete | waste concrete | Cutoff, S - Europe without Switzerland
	Waste Concrete	t per pitch	1521.1	2500.54	2500.54	2500.54
	Itten, Maintenance per year for natural grass!
			NT	AT			Ecoinvent process used for modelling:
	Flow	Unit	Drain-Layer	Wood	ELT	EPDM
	Diesel	MJ / m2	2.1443	0	0	0	diesel, burned in building machine | diesel, burned in building machine | Cutoff, S - GLO
	Diesel	GJ / Pitch	15.9107	0	0	0
	Electricity	kWh / m2	0.002438	0	0	0	market for electricity, medium voltage | electricity, medium voltage | Cutoff, S - NO
	Electricity	MWh / Pitch	0.01809	0	0	0
	Steel, Low alloyed, hot rolled	kg /m2	0.000358	0	0	0	market for steel, low-alloyed, hot rolled | steel, low-alloyed, hot rolled | Cutoff, S - GLO
	Steel, Low alloyed, hot rolled	t per pitch	0.00265636	0	0	0
	Irrigation	m3 / m2	0.39183	0	0	0	market for irrigation | irrigation | Cutoff, S - DE
	Irrigation	m3 / pitch	2907.38	0	0	0
	Tap Water	kg /m2	0.185	0	0	0	market for tap water | tap water | Cutoff, S - Europe without Switzerland
	Tap Water	kg / pitch	1372.7	0	0	0
	Fosetyl-Al	kg /m2	5.6e-05	0	0	0	market for fosetyl-Al | fosetyl-Al | Cutoff, S - GLO
	Fosetyl-Al	kg / pitch	0.41552	0	0	0
	Chlorothalonil	kg /m2	9.65e-05	0	0	0	market for chlorothalonil | chlorothalonil | Cutoff, S - GLO
	Chlorothalonil	kg / pitch	0.71603	0	0	0
	Pesticide, unspecified	kg /m2	0.00042	0	0	0	market for pesticide, unspecified | pesticide, unspecified | Cutoff, S - GLO
	Pesticide, unspecified	kg / pitch	3.1164	0	0	0
	Sand	kg /m2	6.64	0	0	0	market for sand | sand | Cutoff, S - CH
	Sand	kg / pitch	49268.8	0	0	0
	Grass Seed	kg /m2	0.0561	0	0	0	market for grass seed, organic, for sowing | grass seed, organic, for sowing | Cutoff, S - GLO
	Grass Seed	kg / pitch	416.262	0	0	0
	Alkyd Paint	kg /m2	0.00624	0	0	0	market for alkyd paint, white, without solvent, in 60% solution state | alkyd paint, white, without solvent, in 60% solution state | Cutoff, S - RER
	Alkyd Paint	kg / pitch	46.3008	0	0	0
	Fooball pitch, rolled turf	m2	0.0186				See Line 71-98
	Fooball pitch, rolled turf	m2 / pitch	138.012
	Nitrogen Fertiliser	kg per m2	0.0307	0	0	0	market for inorganic nitrogen fertiliser, as N | inorganic nitrogen fertiliser, as N | Cutoff, S - NO
	Nitrogen Fertiliser	t per pitch	0.227794	0	0	0
	Potassium Fertiliser	kg per m2	0.0212	0	0	0	market for inorganic potassium fertiliser, as K2O | inorganic potassium fertiliser, as K2O | Cutoff, S - NO
	Potassium Fertiliser	t per pitch	0.157304	0	0	0
	Phopshate Fertilizer	kg per m2	0.00558	0	0	0	market for inorganic phosphorus fertiliser, as P2O5 | inorganic phosphorus fertiliser, as P2O5 | Cutoff, S - NO
	Phopshate Fertilizer	t per pitch	0.0414036	0	0	0
	Emissions to Air
	Ammonia	kg /m2	0.00617	0	0	0	Ammonia, NO - Emission to air/unspecified
	Ammonia	kg / pitch	0.0457814	0	0	0
	Nitrogen Dioxide	kg /m2	0.000245	0	0	0	Nitrogen dioxide, NO - Emission to air/unspecified
	Nitrogen Dioxide	kg / pitch	0.0018179	0	0	0
	Dinitrogen Monoxide	kg /m2	0.00117	0	0	0	Dinitrogen Monoxide - Emission to air/unspecified
	Dinitrogen Monoxide	kg / pitch	8.6814	0	0	0
	Emissions to Soil
	Fosetyl-Aluminium	kg /m2	5.6e-05	0	0	0	Fosetyl-aluminium - Emission to soil/agricultural
	Fosetyl-Aluminium	kg / pitch	0.41552	0	0	0
	Azoxystrobin	kg /m2	1.15e-05	0	0	0	Azoxystrobin - Emission to soil/unspecified
	Azoxystrobin	kg / pitch	0.08533	0	0	0
	Chlorothalonil	kg /m2	9.65e-05	0	0	0	Chlorothalonil - Emission to soil/unspecified
	Chlorothalonil	kg / pitch	0.71603	0	0	0
	Cyprodinil	kg /m2	2.71e-05	0	0	0	Cyprodinil - Emission to soil/unspecified
	Cyprodinil	kg / pitch	0.201082	0	0	0
	Fludioxonil	kg /m2	1.81e-05	0	0	0	Fludioxonil - Emission to soil/unspecified
	Fludioxonil	kg / pitch	0.134302	0	0	0
	Pesticides, Unspecified	kg /m2	6.46e-05	0	0	0	Pesticides, unspecified - Emission to soil/unspecified
	Pesticides, Unspecified	kg / pitch	0.479332	0	0	0
	Emissions to Water
	Nitrate	kg /m2	0.0405	0	0	0	Nitrate - Emission to water/unspecified
		kg / pitch	300.51	0	0	0
	Phsophate	kg /m2	3.48e-05	0	0	0	Phosphate, NO - Emission to water/unspecified
		kg / pitch	0.258216	0	0	0
	Outputs to Technosphere
	MSWI	kg /m2	0.0228	0	0	0	treatment of municipal solid waste, incineration | municipal solid waste | Cutoff, S - NO
		kg / pitch	169.176	0	0	0
	Biowaste	kg /m2	2.6734	0	0	0	treatment of biowaste by anaerobic digestion | biowaste | Cutoff, S - RoW
		kg / pitch	19836.6	0	0	0
	Itten, Maintenance of Synthethic Turf in kg / m2 per year
			NT	AT			Ecoinvent process used for modelling:
	Flow	Unit	Drain-Layer	Wood	ELT	EPDM
	Diesel	MJ / m2	0	0.51444	0.51444	0.51444	diesel, burned in building machine | diesel, burned in building machine | Cutoff, S - GLO
	Diesel	GJ / Pitch	0	3.81714	3.81714	3.81714
	Electricity	kWh / m2	0	0.00188	0.00188	0.00188	market for electricity, medium voltage | electricity, medium voltage | Cutoff, S - NO
	Electricity	MWh / Pitch	0	0.0139496	0.0139496	0.0139496
	Irrigation	m3 /m2	0	0.125	0.125	0.125	market for irrigation | irrigation | Cutoff, S - DE
	Irrigation	m3 / pitch	0	927.5	927.5	927.5
	Outputs
	MSWI	kg /m2	0	0.04261	0.04261	0.04261	treatment of municipal solid waste, incineration | municipal solid waste | Cutoff, S - NO
	MSWI	kg / pitch	0	316.166	316.166	316.166
	Biowaste	kg /m2	0	0.0135	0.0135	0.0135	treatment of biowaste by anaerobic digestion | biowaste | Cutoff, S - RoW
	Biowaste	kg / pitch	0	100.17	100.17	100.17

## Sheet: Infills
	Infill Balance:
	Process Step	Wood	ELT	EPDM			Ecoinvent modelling
	Construction	5	6.47	6	kg / m2		EPDM: synthetic rubber production | synthetic rubber | Cutoff, S - RER
		37.1	48.0074	44.52	ton / pitch		Wood & ELT: see sheet "Infill productioN"
	Renvoation 1 (10 years)	-5	-6.47	-6	kg / m2		treatment of waste wood, untreated, municipal incineration | waste wood, untreated | Cutoff, S - RoW
		-37.1	-48.0074	-44.52	ton / pitch		treatment of waste rubber, unspecified, municipal incineration | waste rubber, unspecified | Cutoff, S - Europe without Switzerland
		5	6.47	6	kg / m2		- II -
		37.1	48.0074	44.52	ton / pitch		- II -
	Renvoation 2 (20 years)	-5	-6.47	-6	kg / m2		- II -
		-37.1	-48.0074	-44.52	ton / pitch		- II -
		5	6.47	6	kg / m2		- II -
		37.1	48.0074	44.52	ton / pitch		- II -
	Demolition (30 years)	-5	-6.47	-6	kg / m2		- II -
		-37.1	-48.0074	-44.52	ton / pitch		- II -
	Supplement (Annually)	12.0485	12.0485	12.0485	kg / m2		- II -
		89.4	89.4	89.4	ton / pitch		- II -
	Total Input	200.7	233.422	222.96	tons
	Best Case of MP emissions - Amount for disposal	200.642	233.365	222.902	tons
	% entering the aquatic environment	0.000286506	0.000246343	0.000257902
		57.4853	57.4877	57.487	kg
	Base Case of MP emissions - Amount for disposal	199.237	231.959	221.497	tons
	% entering the aquatic environment	0.00728903	0.00626722	0.00656131
		1462.91	1462.91	1462.91	kg
	Worst Case of MP emissions - Amount for disposal	190.947	223.669	213.207	tons
	% entering the aquatic environment	0.0485949	0.0417827	0.0437433
		9753	9753	9753	kg

## Sheet: Scenarios
	DTI					To Aquatic
	Input Per Year / kg		2200	in %		Best Case		Base Case		Worst Case
	Loss on Clothing		40	0.0181818
		Sewage	20	0.00909091		0.16	7.27273e-05	0.8	0.000363636	20	0.00909091
		Sweeping for MSWI	20	0.00909091						20	0.00909091
	Discharge with Water	Sewage	6-120			0.2	9.09091e-05	4.8	0.00218182	120	0.0545455
		Retention Ponds	1.2-2.4			0.1	4.54545e-05	2.4	0.00109091	24	0.0109091
		Direct Discharge	2.8'-56			1.4	0.000636364	28	0.0127273	56	0.0254545
	Total					1.86	0.000845455	36	0.0163636	240	0.109091
	Case Studies					To Aquatic
	Input Per Year / kg		2980	in %		Best Case		Base Case		Worst Case
	Loss on Clothing		54.1818	0.0181818
		Sewage	27.0909	0.00909091		0.216727	9.85124e-05	1.08364	0.000363636	27.0909	0.00909091
		Sweeping for MSWI	27.0909	0.00909091						27.1	0.00909091
	Discharge with Water	Sewage	6-120			0.2	6.71141e-05	6.50182	0.00218182	162.545	0.0545455
		Retention Ponds	1.2-2.4			0.1	3.3557e-05	3.25091	0.00109091	32.5091	0.0109091
		Direct Discharge	2.8'-56			1.4	0.000469799	37.9273	0.0127273	75.8545	0.0254545
	Total					1.91673	0.000643197	48.7636	0.0163636	325.1	0.109094
													Picture taken from
													https://www.genan.eu/wp-content/uploads/2020/02/Teknologisk-Institut_Mass-balance-of-rubber-granulate-lost-from-artificial-turf-fields_May-2019_v1.pdf

## Sheet: Pitch components lifetime
	Infill Type	Unit	NT	AT - Wood	AT- ELT	AT - EPDM
	Field size	m²	7420	7420	7420	7420
	hours of use (theoretical)	h/a	800	1600
	lifetime	a	15	15
	renovation interval turf surface	a	15	10
	lifetime substructure natural and artificial turf	a	30
	lifetime sand-infill	a	-	10
	lifetime performance-infill	a	-	10

## Sheet: Production of Infill
	1 kg of wood-based (GOE) infill
				Ecoinvent modelling
	Wood chips	1.25	kg	market for wood chips and particles, willow | wood chips and particles, willow | Cutoff, S - RER
	Electricity	0.13	kWh	market for electricity, medium voltage | electricity, medium voltage | Cutoff, S - NO
	Waste Wood	0.25	kg	treatment of waste wood, untreated, municipal incineration | waste wood, untreated | Cutoff, S - RoW
	1 kg of ELT infill*
				Ecoinvent modelling
	Electricity	0.368	kWh	electricity, high voltage, production mix | electricity, high voltage | Cutoff, S - NO
	Municipal solid waste	0.39	kg	treatment of municipal solid waste, incineration | municipal solid waste | Cutoff, S - NO
	Scrap Steel	0.34	kg	market for scrap steel | scrap steel | Cutoff, S - Europe without Switzerland
	* based on https://www.ragnsellstyrerecycling.com/globalassets/tyre-company/dokument/lca-konstgrasplaner-gummiasfalt-version-1.4_2018_rs.pdf
