# Supplementary material
Source: MDPI journal article supplement (https://www.mdpi.com/2071-1050/16/8/3487)
Supplement: s1 [file s1 › TableS2.xlsx]

## Sheet: CFs of MPs
		Degradation Rates
		Case Study	Specific Surface Degradation Rate (µm / year)	Surface Area / (m2 / g)	Density / (kg / m3)		Degradation rate (kg/ kg per year)	T 1/2 / years	Comment
	EPDM	EPDM_High	13	0.5	1580		10.27	0.0674924
		EPDM_Low	1	0.5	1580		0.79	0.877401
		Source	https://doi.org/10.1016/j.polymdegradstab.2011.04.007	https://doi.org/10.1134/S1990793116040102	https://www.stargum.pl/en/granulat/epdm-infill.html#wlasciwosci
	ELT	ELT_Bacteria	n/A	n/A	n/A		0.253375	2.73566	Based upon 7.5% in 4 Weeks	https://doi.org/10.3389/fbioe.2021.761510
		ELT_Tyre	n/A	n/A	n/A		0.0511686	13.5463	90 years in nature	https://doi.org/10.1088/1757-899X/1200/1/012009
	TWRP	5000µm_Fast					0.06984	9.92479		https://doi.org/10.1111/jiec.13269
		5000µm_Medium		n/A	n/A		0.000334281	2073.54
		5000µm_Slow					1.6e-06	433217
		1000µm_Fast					0.3492	1.98496
		1000µm_Medium		n/A	n/A		0.00167141	414.709
		1000µm_Slow					8e-06	86643.4
		Sedimentation Rates
		Sedimentation description	Sedimentation percentage	Residence time (years)			Sedimentation rate (kg/kg*year)	Half-life check (years)	Half-life check (days)
		Fast_TWRP	1	0.0833333			55.262	0.0125429	4.57816	https://doi.org/10.1111/jiec.13269
		Slow_TWRP	1	0.5			9.21034	0.0752575	27.469	https://doi.org/10.1111/jiec.13269
		Allplastic	1	3			1.53506	0.451545	164.814	https://doi.org/10.1088/1748-9326/aa9500
		Total Loss Rates, fate and effect factors
		Degradation	Sedimentation	Removal rate (kg/ kg * year)	Fate factor (kg * year / kg)	Midpoint	Endpoint/Ecosystem damage (PDF * m2 * year / kg)	Ln(ENDPOINT)	Exporse and Effect Factor (EEF) PAF m3 / kg	Severity Factor		Geometric Std.Dev	Mean CF
		EPDM_High	TWRP_Fast	65.532	0.0152597	16.2897	0.00407244	-5.50351	1067.5	0.025		3.47879	0.033266		Values for all EPDM Data
		EPDM_High	TWRP_Slow	10.0003	0.0999966	106.746	0.0266866	-3.62359				2.83145	0.0177886		Values for High Degradation (Recommended)
		EPDM_High	AllPlastic	11.8051	0.0847095	90.4274	0.0226068	-3.7895				4.91899	0.0487433		Values for Low degradation
		EPDM_Low	TWRP_Fast	56.052	0.0178406	19.0448	0.0047612	-5.34726
		EPDM_Low	TWRP_Slow	10.0003	0.0999966	106.746	0.0266866	-3.62359
		EPDM_Low	AllPlastic	2.32506	0.430097	459.129	0.114782	-2.16472
		5000µm_Fast	TWRP_Fast	55.3319	0.0180728	19.2927	0.00482317	-5.33432				4.36263	0.0661972		Values for all ELT Data
		5000µm_Fast	TWRP_Slow	9.28018	0.107757	115.03	0.0287575	-3.54886				1.00244	0.00482138		Fast Sedimentation
		5000µm_Fast	AllPlastic	1.6049	0.623093	665.152	0.166288	-1.79403				1.01452	0.0286982		Slow
		5000µm_Medium	TWRP_Fast	55.2624	0.0180955	19.3169	0.00482923	-5.33307				1.0831	0.165072		All plastic
		5000µm_Medium	TWRP_Slow	9.21067	0.10857	115.898	0.0289745	-3.54134
		5000µm_Medium	AllPlastic	1.53539	0.6513	695.263	0.173816	-1.74976
		5000µm_Slow	TWRP_Fast	55.262	0.0180956	19.3171	0.00482926	-5.33306
		5000µm_Slow	TWRP_Slow	9.21034	0.108574	115.902	0.0289756	-3.5413
		5000µm_Slow	AllPlastic	1.53506	0.651441	695.413	0.173853	-1.74954
		1000µm_Fast	TWRP_Fast	55.6112	0.017982	19.1958	0.00479894	-5.33936				4.59103
		1000µm_Fast	TWRP_Slow	9.55954	0.104608	111.669	0.0279171	-3.57851
		1000µm_Fast	AllPlastic	1.88426	0.530713	566.536	0.141634	-1.95451
		1000µm_Medium	TWRP_Fast	55.2637	0.0180951	19.3165	0.00482912	-5.33309
		1000µm_Medium	TWRP_Slow	9.21201	0.108554	115.881	0.0289703	-3.54148
		1000µm_Medium	AllPlastic	1.53673	0.650733	694.658	0.173664	-1.75063
		1000µm_Slow	TWRP_Fast	55.2621	0.0180956	19.3171	0.00482926	-5.33306
		1000µm_Slow	TWRP_Slow	9.21035	0.108574	115.902	0.0289756	-3.5413
		1000µm_Slow	AllPlastic	1.53506	0.651438	695.41	0.173853	-1.74955
		ELT_Bacteria	TWRP_Fast	55.5154	0.018013	19.2289	0.00480722	-5.33764				5.57292
		ELT_Bacteria	TWRP_Slow	9.46372	0.105667	112.799	0.0281998	-3.56844
		ELT_Bacteria	AllPlastic	1.78843	0.559149	596.892	0.149223	-1.90231
		ELT_Tyre	TWRP_Fast	55.3132	0.0180789	19.2992	0.0048248	-5.33399				5.90524
		ELT_Tyre	TWRP_Slow	9.26151	0.107974	115.262	0.0288155	-3.54684
		ELT_Tyre	AllPlastic	1.58623	0.630427	672.981	0.168245	-1.78233

## Sheet: Final Endpoint Results
	Physical Effects on Biota / 1 hour of football played
	Useful life Pitch	30	years		Best Case MP emissions	57.49	kg / lifetime
					Base Case MP emissions	1463	kg / lifetime
	Playing time AT	1600	hours / year		Worst Case MP emissions	9753	kg / lifetime
	Sedimentation	Degradation	CF Endpoint	EPDM Base	EPDM Best	EPDM Worst	ELT Base	ELT Best	ELT Worst
	EPDM_High	TWRP_Fast	0.00407244	0.000124124	4.87759e-06	0.000827468
	EPDM_High	TWRP_Slow	0.0266866	0.000813385	3.19628e-05	0.00542238
	EPDM_High	AllPlastic	0.0226068	0.000689038	2.70764e-05	0.00459343
	EPDM_Low	TWRP_Fast	0.0047612	0.000145117	5.70253e-06	0.000967416
	EPDM_Low	TWRP_Slow	0.0266866	0.000813385	3.19628e-05	0.00542238
	EPDM_Low	AllPlastic	0.114782	0.00349846	0.000137476	0.0233223
	5000µm_Fast	TWRP_Fast	0.00482317				0.000147006	5.77675e-06	0.000980008
	5000µm_Fast	TWRP_Slow	0.0287575				0.000876505	3.44431e-05	0.00584317
	5000µm_Fast	AllPlastic	0.166288				0.00506832	0.000199164	0.0337876
	5000µm_Medium	TWRP_Fast	0.00482923				0.000147191	5.78401e-06	0.00098124
	5000µm_Medium	TWRP_Slow	0.0289745				0.00088312	3.4703e-05	0.00588726
	5000µm_Medium	AllPlastic	0.173816				0.00529776	0.00020818	0.0353172
	5000µm_Slow	TWRP_Fast	0.00482926				0.000147192	5.78405e-06	0.000981246
	5000µm_Slow	TWRP_Slow	0.0289756				0.000883152	3.47043e-05	0.00588748
	5000µm_Slow	AllPlastic	0.173853				0.0052989	0.000208226	0.0353248
	1000µm_Fast	TWRP_Fast	0.00479894				0.000146268	5.74773e-06	0.000975085
	1000µm_Fast	TWRP_Slow	0.0279171				0.000850891	3.34366e-05	0.00567241
	1000µm_Fast	AllPlastic	0.141634				0.00431689	0.000169636	0.0287783
	1000µm_Medium	TWRP_Fast	0.00482912				0.000147187	5.78387e-06	0.000981216
	1000µm_Medium	TWRP_Slow	0.0289703				0.000882991	3.4698e-05	0.00588641
	1000µm_Medium	AllPlastic	0.173664				0.00529315	0.000207999	0.0352864
	1000µm_Slow	TWRP_Fast	0.00482926				0.000147192	5.78405e-06	0.000981246
	1000µm_Slow	TWRP_Slow	0.0289756				0.000883151	3.47043e-05	0.00588747
	1000µm_Slow	AllPlastic	0.173853				0.00529888	0.000208225	0.0353247
	ELT_Bacteria	TWRP_Fast	0.00480722				0.00014652	5.75765e-06	0.000976768
	ELT_Bacteria	TWRP_Slow	0.0281998				0.000859507	3.37752e-05	0.00572985
	ELT_Bacteria	AllPlastic	0.149223				0.00454819	0.000178726	0.0303202
	ELT_Tyre	TWRP_Fast	0.0048248				0.000147056	5.7787e-06	0.000980338
	ELT_Tyre	TWRP_Slow	0.0288155				0.000878272	3.45126e-05	0.00585495
	ELT_Tyre	AllPlastic	0.168245				0.00512798	0.000201509	0.0341853
