# Supplementary material
Source: MDPI journal article supplement (https://www.mdpi.com/2071-1050/16/8/3487)
Supplement: s1 [file s1 › TableS3.xlsx]

## Sheet: Midpoint_Master_1h
Midpoint categories - Total results per 1 h of football played
Scenario	Climate change, long term	Climate change, short term	Fossil and nuclear energy use	Freshwater acidification	Freshwater ecotoxicity	Freshwater eutrophication	Human toxicity cancer	Human toxicity non cancer	Ionizing radiations	Land occupation, biodiversity	Land transformation, biodiversity	Marine eutrophication	Mineral resources use	Ozone Layer Depletion	Particulate matter formation	Photochemical oxidant formation	Terrestrial acidification	Water scarcity
Grass	24.7119	28.4529	284.461	3.41273e-12	3.93587e+06	0.000191658	3.08123e-06	1.09396e-05	77.2252	0.574731	0.042562	0.0505398	0.376982	4.1579e-07	0.0147084	0.141665	2.38917e-06	216.486
ELT_Best	29.2651	30.7538	238.029	3.08317e-13	199691	4.63706e-05	1.47962e-06	1.71533e-06	39.9705	0.162842	0.00511164	0.00101829	0.208083	2.23148e-07	0.00598362	0.0728751	1.9902e-07	41.968
ELT_Base	29.173	30.6616	238.015	3.08255e-13	199650	4.62403e-05	1.47944e-06	1.71421e-06	39.9659	0.16283	0.00511146	0.00101807	0.207999	2.23044e-07	0.0059831	0.0728606	1.98979e-07	41.9557
ELT_Worst	28.6279	30.1161	237.93	3.07893e-13	199408	4.5469e-05	1.4784e-06	1.70761e-06	39.9388	0.162763	0.00511043	0.00101676	0.207499	2.2243e-07	0.00598001	0.0727743	1.98739e-07	41.8823
EPDM_Best	38.3405	41.3112	623.333	6.04697e-13	276638	6.17537e-05	2.34967e-06	3.34965e-06	201.845	0.199521	0.00639796	0.00168693	0.316753	5.61753e-07	0.0122872	0.137082	3.8472e-07	72.7139
EPDM_Base	38.2484	41.219	623.319	6.04636e-13	276597	6.16235e-05	2.34949e-06	3.34854e-06	201.84	0.19951	0.00639779	0.00168671	0.316669	5.61649e-07	0.0122867	0.137068	3.8468e-07	72.7015
EPDM_Worst	37.7033	40.6735	623.234	6.04274e-13	276355	6.08522e-05	2.34845e-06	3.34194e-06	201.813	0.199443	0.00639676	0.00168539	0.316169	5.61035e-07	0.0122836	0.136981	3.8444e-07	72.6281
Wood	13.3315	14.8311	240.088	3.10035e-13	115758	0.000102155	1.41542e-06	1.43104e-06	41.3525	0.162175	0.00512977	0.00103828	0.193206	2.11458e-07	0.00609229	0.0731472	2.0125e-07	38.8244

## Sheet: CC_longterm
Natural Grass						Wood-Based Infill						ELT - Base						EPDM - Base
Percentual Contribution			Process	Amount	Unit	Percentual Contribution			Process	Amount	Unit	Percentual Contribution			Process	Amount	Unit	Percentual Contribution			Process	Amount	Unit
1				24.7119	kg CO2 eq (long)	1			GOE - Wood based infill	13.3315	kg CO2 eq (long)	1			Artificial Gras - ELT - Base Case	30.6617	kg CO2 eq (short)	1			Artificial Gras - EPDM - Base Case	38.2483	kg CO2 eq (long)
	0.5118		Maintenance: Natural Gras	12.6485	kg CO2 eq (long)		0.2646		Renovation: Artificial Turf	3.52765	kg CO2 eq (long)		0.5313		ELT - Base Case	16.289	kg CO2 eq (short)		0.6627		EPDM - Base Case	25.3458	kg CO2 eq (long)
		0.0777	treatment of biowaste by anaerobic digestion | biowaste | Cutoff, S - RoW	1.91908	kg CO2 eq (long)			0.1379	treatment of waste plastic, mixture, municipal incineration | waste plastic, mixture | Cutoff, S - RoW	1.83876	kg CO2 eq (long)			0.4979	treatment of waste rubber, unspecified, municipal incineration | waste rubber, unspecified | Cutoff, S - Europe without Switzerland	15.265	kg CO2 eq (short)			0.3808	treatment of waste rubber, unspecified, municipal incineration | waste rubber, unspecified | Cutoff, S - Europe without Switzerland	14.5649	kg CO2 eq (long)
		0.0763	diesel, burned in building machine | diesel, burned in building machine | Cutoff, S - GLO	1.8846	kg CO2 eq (long)			0.0494	polyethylene production, high density, granulate | polyethylene, high density, granulate | Cutoff, S - RER	0.65794	kg CO2 eq (long)			0.0334	Production of ELT	1.024	kg CO2 eq (short)			0.2819	synthetic rubber production | synthetic rubber | Cutoff, S - RER	10.781	kg CO2 eq (long)
		0.0725	market for inorganic nitrogen fertiliser, as N | inorganic nitrogen fertiliser, as N | Cutoff, S - NO	1.79215	kg CO2 eq (long)			0.0485	polypropylene production, granulate | polypropylene, granulate | Cutoff, S - RER	0.646	kg CO2 eq (long)		0.1281	0	Construction of the base layer - Football Pitch - Artificial Turf	3.92638	kg CO2 eq (short)		0.0922		Renovation: Artificial Turf	3.52765	kg CO2 eq (long)
		0.0429	market for inorganic potassium fertiliser, as K2O | inorganic potassium fertiliser, as K2O | Cutoff, S - NO	1.05927	kg CO2 eq (long)			0.0149	diesel, burned in building machine | diesel, burned in building machine | Cutoff, S - GLO	0.199028	kg CO2 eq (long)			0.0756	mastic asphalt production | mastic asphalt | Cutoff, S - RoW	2.31779	kg CO2 eq (short)			0.0481	treatment of waste plastic, mixture, municipal incineration | waste plastic, mixture | Cutoff, S - RoW	1.83876	kg CO2 eq (long)
		0.0346	market for grass seed, organic, for sowing | grass seed, organic, for sowing | Cutoff, S - GLO	0.85475	kg CO2 eq (long)			0.0139	silica sand production | silica sand | Cutoff, S - RoW	0.185929	kg CO2 eq (long)			0.0439	market for gravel, crushed | gravel, crushed | Cutoff, S - RoW	1.34736	kg CO2 eq (short)			0.0172	polyethylene production, high density, granulate | polyethylene, high density, granulate | Cutoff, S - RER	0.65794	kg CO2 eq (long)
		0.0248	market for irrigation | irrigation | Cutoff, S - DE	0.612613	kg CO2 eq (long)		0.2544	0	Construction of the base layer - Football Pitch - Artificial Turf	3.39123	kg CO2 eq (long)			0.0054	diesel, burned in building machine | diesel, burned in building machine | Cutoff, S - GLO	0.166978	kg CO2 eq (short)			0.0169	polypropylene production, granulate | polypropylene, granulate | Cutoff, S - RER	0.646	kg CO2 eq (long)
		0.0127	market for alkyd paint, white, without solvent, in 60% solution state | alkyd paint, white, without solvent, in 60% solution state | Cutoff, S - RER	0.314891	kg CO2 eq (long)			0.142	mastic asphalt production | mastic asphalt | Cutoff, S - RoW	1.89316	kg CO2 eq (long)			0.0023	market for sand | sand | Cutoff, S - RoW	0.0699689	kg CO2 eq (short)			0.0052	diesel, burned in building machine | diesel, burned in building machine | Cutoff, S - GLO	0.199028	kg CO2 eq (long)
		0.0125	market for sand | sand | Cutoff, S - CH	0.309168	kg CO2 eq (long)			0.0939	market for gravel, crushed | gravel, crushed | Cutoff, S - RoW	1.25239	kg CO2 eq (long)			0.0008	concrete block production | concrete block | Cutoff, S - RoW	0.0242663	kg CO2 eq (short)			0.0049	silica sand production | silica sand | Cutoff, S - RoW	0.185929	kg CO2 eq (long)
		0.0112	market for inorganic phosphorus fertiliser, as P2O5 | inorganic phosphorus fertiliser, as P2O5 | Cutoff, S - NO	0.276036	kg CO2 eq (long)			0.0118	diesel, burned in building machine | diesel, burned in building machine | Cutoff, S - GLO	0.15705	kg CO2 eq (long)		0.1231	0	Renovation: Artificial Turf	3.77404	kg CO2 eq (short)		0.0887		Construction of the base layer - Football Pitch - Artificial Turf	3.39123	kg CO2 eq (long)
		0.0098	Construction of natural gras	0.241397	kg CO2 eq (long)			0.0049	market for sand | sand | Cutoff, S - RoW	0.0654199	kg CO2 eq (long)			0.06	treatment of waste plastic, mixture, municipal incineration | waste plastic, mixture | Cutoff, S - RoW	1.84082	kg CO2 eq (short)			0.0495	mastic asphalt production | mastic asphalt | Cutoff, S - RoW	1.89316	kg CO2 eq (long)
		0.0045	treatment of municipal solid waste, incineration | municipal solid waste | Cutoff, S - NO	0.110082	kg CO2 eq (long)			0.0017	concrete block production | concrete block | Cutoff, S - RoW	0.0232226	kg CO2 eq (long)			0.0249	polyethylene production, high density, granulate | polyethylene, high density, granulate | Cutoff, S - RER	0.764125	kg CO2 eq (short)			0.0327	market for gravel, crushed | gravel, crushed | Cutoff, S - RoW	1.25239	kg CO2 eq (long)
		0.0014	market for pesticide, unspecified | pesticide, unspecified | Cutoff, S - GLO	0.0358071	kg CO2 eq (long)		0.1669	0	Football Stadium: Construction of Groundworks - Artificial Turf - NO	2.22544	kg CO2 eq (long)			0.0247	polypropylene production, granulate | polypropylene, granulate | Cutoff, S - RER	0.758383	kg CO2 eq (short)			0.0041	diesel, burned in building machine | diesel, burned in building machine | Cutoff, S - GLO	0.15705	kg CO2 eq (long)
		0.0003	market for steel, low-alloyed, hot rolled | steel, low-alloyed, hot rolled | Cutoff, S - GLO	0.00699674	kg CO2 eq (long)			0.1091	market for quicklime, milled, packed | quicklime, milled, packed | Cutoff, S - RER	1.45389	kg CO2 eq (long)			0.0069	diesel, burned in building machine | diesel, burned in building machine | Cutoff, S - GLO	0.21161	kg CO2 eq (short)			0.0017	market for sand | sand | Cutoff, S - RoW	0.0654199	kg CO2 eq (long)
		0.0002	market for fosetyl-Al | fosetyl-Al | Cutoff, S - GLO	0.00421705	kg CO2 eq (long)			0.0314	treatment of biowaste by anaerobic digestion | biowaste | Cutoff, S - RoW	0.419275	kg CO2 eq (long)			0.0065	silica sand production | silica sand | Cutoff, S - RoW	0.199103	kg CO2 eq (short)			0.0006	concrete block production | concrete block | Cutoff, S - RoW	0.0232226	kg CO2 eq (long)
		0.0001	market for chlorothalonil | chlorothalonil | Cutoff, S - GLO	0.00337123	kg CO2 eq (long)			0.0264	diesel, burned in building machine | diesel, burned in building machine | Cutoff, S - GLO	0.352262	kg CO2 eq (long)		0.0854	0	Football Stadium: Construction of Groundworks - Artificial Turf - NO	2.61915	kg CO2 eq (short)		0.0582		Football Stadium: Construction of Groundworks - Artificial Turf - NO	2.22544	kg CO2 eq (long)
		0	market for electricity, medium voltage | electricity, medium voltage | Cutoff, S - NO	0.000628189	kg CO2 eq (long)		0.0986	0	Football Stadium: Infrastructure, Lights, Fence and Mowing edges	1.3151	kg CO2 eq (long)			0.0491	market for quicklime, milled, packed | quicklime, milled, packed | Cutoff, S - RER	1.50535	kg CO2 eq (short)			0.038	market for quicklime, milled, packed | quicklime, milled, packed | Cutoff, S - RER	1.45389	kg CO2 eq (long)
		0	market for tap water | tap water | Cutoff, S - Europe without Switzerland	0.000506078	kg CO2 eq (long)			0.0425	market for concrete, normal strength | concrete, normal strength | Cutoff, S - AT	0.565967	kg CO2 eq (long)			0.0241	treatment of biowaste by anaerobic digestion | biowaste | Cutoff, S - RoW	0.739252	kg CO2 eq (short)			0.011	treatment of biowaste by anaerobic digestion | biowaste | Cutoff, S - RoW	0.419275	kg CO2 eq (long)
	0.1081		Construction of the base layer - Football Pitch - Natural Turf	2.67022	kg CO2 eq (long)			0.0131	market for steel, low-alloyed | steel, low-alloyed | Cutoff, S - GLO	0.17479	kg CO2 eq (long)			0.0122	diesel, burned in building machine | diesel, burned in building machine | Cutoff, S - GLO	0.374531	kg CO2 eq (short)			0.0092	diesel, burned in building machine | diesel, burned in building machine | Cutoff, S - GLO	0.352262	kg CO2 eq (long)
		0.0986	market for silica sand | silica sand | Cutoff, S - GLO	2.43688	kg CO2 eq (long)			0.0126	market for reinforcing steel | reinforcing steel | Cutoff, S - GLO	0.168309	kg CO2 eq (long)		0.0455	0	Football Stadium: Infrastructure, Lights, Fence and Mowing edges	1.39644	kg CO2 eq (short)		0.0344		Football Stadium: Infrastructure, Lights, Fence and Mowing edges	1.3151	kg CO2 eq (long)
		0.0086	diesel, burned in building machine | diesel, burned in building machine | Cutoff, S - GLO	0.213118	kg CO2 eq (long)			0.0073	aluminium production, primary, ingot | aluminium, primary, ingot | Cutoff, S - IAI Area, EU27 & EFTA	0.0976988	kg CO2 eq (long)			0.0191	market for concrete, normal strength | concrete, normal strength | Cutoff, S - AT	0.585658	kg CO2 eq (short)			0.0148	market for concrete, normal strength | concrete, normal strength | Cutoff, S - AT	0.565967	kg CO2 eq (long)
		0.0008	limestone production, crushed, washed | limestone, crushed, washed | Cutoff, S - RoW	0.0202211	kg CO2 eq (long)			0.0055	electronic component production, passive, unspecified | electronic component, passive, unspecified | Cutoff, S - GLO	0.0726889	kg CO2 eq (long)			0.0062	market for steel, low-alloyed | steel, low-alloyed | Cutoff, S - GLO	0.189363	kg CO2 eq (short)			0.0046	market for steel, low-alloyed | steel, low-alloyed | Cutoff, S - GLO	0.17479	kg CO2 eq (long)
	0.1064	0	Football Stadium: Infrastructure, Lights, Fence and Mowing edges	2.63021	kg CO2 eq (long)			0.0044	market for polyethylene, high density, granulate | polyethylene, high density, granulate | Cutoff, S - GLO	0.0586162	kg CO2 eq (long)			0.006	market for reinforcing steel | reinforcing steel | Cutoff, S - GLO	0.1829	kg CO2 eq (short)			0.0044	market for reinforcing steel | reinforcing steel | Cutoff, S - GLO	0.168309	kg CO2 eq (long)
		0.0458	market for concrete, normal strength | concrete, normal strength | Cutoff, S - AT	1.13193	kg CO2 eq (long)			0.0036	metal working, average for aluminium product manufacturing | metal working, average for aluminium product manufacturing | Cutoff, S - RER	0.0485897	kg CO2 eq (long)			0.0033	aluminium production, primary, ingot | aluminium, primary, ingot | Cutoff, S - IAI Area, EU27 & EFTA	0.101777	kg CO2 eq (short)			0.0026	aluminium production, primary, ingot | aluminium, primary, ingot | Cutoff, S - IAI Area, EU27 & EFTA	0.0976988	kg CO2 eq (long)
		0.0141	market for steel, low-alloyed | steel, low-alloyed | Cutoff, S - GLO	0.34958	kg CO2 eq (long)			0.0035	concrete block production | concrete block | Cutoff, S - DE	0.046086	kg CO2 eq (long)			0.0026	electronic component production, passive, unspecified | electronic component, passive, unspecified | Cutoff, S - GLO	0.0784653	kg CO2 eq (short)			0.0019	electronic component production, passive, unspecified | electronic component, passive, unspecified | Cutoff, S - GLO	0.0726889	kg CO2 eq (long)
		0.0136	market for reinforcing steel | reinforcing steel | Cutoff, S - GLO	0.336619	kg CO2 eq (long)			0.0028	diesel, burned in building machine | diesel, burned in building machine | Cutoff, S - GLO	0.0369875	kg CO2 eq (long)			0.0022	market for polyethylene, high density, granulate | polyethylene, high density, granulate | Cutoff, S - GLO	0.0670803	kg CO2 eq (short)			0.0015	market for polyethylene, high density, granulate | polyethylene, high density, granulate | Cutoff, S - GLO	0.0586162	kg CO2 eq (long)
		0.0079	aluminium production, primary, ingot | aluminium, primary, ingot | Cutoff, S - IAI Area, EU27 & EFTA	0.195398	kg CO2 eq (long)			0.0022	market for polypropylene, granulate | polypropylene, granulate | Cutoff, S - GLO	0.0287401	kg CO2 eq (long)			0.0017	metal working, average for aluminium product manufacturing | metal working, average for aluminium product manufacturing | Cutoff, S - RER	0.0526207	kg CO2 eq (short)			0.0013	metal working, average for aluminium product manufacturing | metal working, average for aluminium product manufacturing | Cutoff, S - RER	0.0485897	kg CO2 eq (long)
		0.0059	electronic component production, passive, unspecified | electronic component, passive, unspecified | Cutoff, S - GLO	0.145378	kg CO2 eq (long)			0.0012	market for extrusion, plastic pipes | extrusion, plastic pipes | Cutoff, S - GLO	0.0166314	kg CO2 eq (long)			0.0016	concrete block production | concrete block | Cutoff, S - DE	0.0481866	kg CO2 eq (short)			0.0012	concrete block production | concrete block | Cutoff, S - DE	0.046086	kg CO2 eq (long)
		0.0047	market for polyethylene, high density, granulate | polyethylene, high density, granulate | Cutoff, S - GLO	0.117232	kg CO2 eq (long)		0.0839	0	Demolition of a football pitch: Artificial Gras	1.11799	kg CO2 eq (long)			0.0013	diesel, burned in building machine | diesel, burned in building machine | Cutoff, S - GLO	0.0393257	kg CO2 eq (short)			0.001	diesel, burned in building machine | diesel, burned in building machine | Cutoff, S - GLO	0.0369875	kg CO2 eq (long)
		0.0039	metal working, average for aluminium product manufacturing | metal working, average for aluminium product manufacturing | Cutoff, S - RER	0.0971794	kg CO2 eq (long)			0.0404	market for waste polypropylene | waste polypropylene | Cutoff, S - NO	0.538463	kg CO2 eq (long)			0.0011	market for polypropylene, granulate | polypropylene, granulate | Cutoff, S - GLO	0.0331497	kg CO2 eq (short)			0.0008	market for polypropylene, granulate | polypropylene, granulate | Cutoff, S - GLO	0.0287401	kg CO2 eq (long)
		0.0037	concrete block production | concrete block | Cutoff, S - DE	0.0921721	kg CO2 eq (long)			0.019	treatment of waste asphalt, sanitary landfill | waste asphalt | Cutoff, S - RoW	0.25335	kg CO2 eq (long)			0.0006	market for extrusion, plastic pipes | extrusion, plastic pipes | Cutoff, S - GLO	0.0179095	kg CO2 eq (short)			0.0004	market for extrusion, plastic pipes | extrusion, plastic pipes | Cutoff, S - GLO	0.0166314	kg CO2 eq (long)
		0.003	diesel, burned in building machine | diesel, burned in building machine | Cutoff, S - GLO	0.0739749	kg CO2 eq (long)			0.0122	diesel, burned in building machine | diesel, burned in building machine | Cutoff, S - GLO	0.162921	kg CO2 eq (long)		0.0401	0	Demolition of a football pitch: Artificial Gras	1.22967	kg CO2 eq (short)		0.0292		Demolition of a football pitch: Artificial Gras	1.11799	kg CO2 eq (long)
		0.0023	market for polypropylene, granulate | polypropylene, granulate | Cutoff, S - GLO	0.0574802	kg CO2 eq (long)			0.007	market for waste polyethylene | waste polyethylene | Cutoff, S - NO	0.0935756	kg CO2 eq (long)			0.0176	market for waste polypropylene | waste polypropylene | Cutoff, S - NO	0.541152	kg CO2 eq (short)			0.0141	market for waste polypropylene | waste polypropylene | Cutoff, S - NO	0.538463	kg CO2 eq (long)
		0.0013	market for extrusion, plastic pipes | extrusion, plastic pipes | Cutoff, S - GLO	0.0332628	kg CO2 eq (long)			0.0034	market for waste concrete | waste concrete | Cutoff, S - Europe without Switzerland	0.0457992	kg CO2 eq (long)			0.0112	treatment of waste asphalt, sanitary landfill | waste asphalt | Cutoff, S - RoW	0.344733	kg CO2 eq (short)			0.0066	treatment of waste asphalt, sanitary landfill | waste asphalt | Cutoff, S - RoW	0.25335	kg CO2 eq (long)
	0.081	0	Demolition of a football pitch: Natural Gras	2.00254	kg CO2 eq (long)			0.0017	market for waste reinforced concrete | waste reinforced concrete | Cutoff, S - Europe without Switzerland	0.0226847	kg CO2 eq (long)			0.0056	diesel, burned in building machine | diesel, burned in building machine | Cutoff, S - GLO	0.17322	kg CO2 eq (short)			0.0043	diesel, burned in building machine | diesel, burned in building machine | Cutoff, S - GLO	0.162921	kg CO2 eq (long)
		0.0294	treatment of inert waste, sanitary landfill | inert waste | Cutoff, S - Europe without Switzerland	0.726329	kg CO2 eq (long)			0.0001	market for scrap steel | scrap steel | Cutoff, S - Europe without Switzerland	0.00120041	kg CO2 eq (long)			0.0031	market for waste polyethylene | waste polyethylene | Cutoff, S - NO	0.094033	kg CO2 eq (short)			0.0024	market for waste polyethylene | waste polyethylene | Cutoff, S - NO	0.0935756	kg CO2 eq (long)
		0.0225	market for waste concrete | waste concrete | Cutoff, S - Europe without Switzerland	0.5572	kg CO2 eq (long)		0.0506	0	Football Stadium: Consturction of Piping System - NO	0.674104	kg CO2 eq (long)			0.0017	market for waste concrete | waste concrete | Cutoff, S - Europe without Switzerland	0.0507524	kg CO2 eq (short)			0.0012	market for waste concrete | waste concrete | Cutoff, S - Europe without Switzerland	0.0457992	kg CO2 eq (long)
		0.0132	diesel, burned in building machine | diesel, burned in building machine | Cutoff, S - GLO	0.325842	kg CO2 eq (long)			0.022	market for gravel, round | gravel, round | Cutoff, S - RoW	0.293956	kg CO2 eq (long)			0.0008	market for waste reinforced concrete | waste reinforced concrete | Cutoff, S - Europe without Switzerland	0.0244456	kg CO2 eq (short)			0.0006	market for waste reinforced concrete | waste reinforced concrete | Cutoff, S - Europe without Switzerland	0.0226847	kg CO2 eq (long)
		0.0076	market for waste polyethylene | waste polyethylene | Cutoff, S - NO	0.187151	kg CO2 eq (long)			0.0165	diesel, burned in building machine | diesel, burned in building machine | Cutoff, S - GLO	0.220162	kg CO2 eq (long)			0	market for scrap steel | scrap steel | Cutoff, S - Europe without Switzerland	0.00133002	kg CO2 eq (short)			0	market for scrap steel | scrap steel | Cutoff, S - Europe without Switzerland	0.00120041	kg CO2 eq (long)
		0.0064	market for waste polypropylene | waste polypropylene | Cutoff, S - NO	0.158242	kg CO2 eq (long)			0.0053	market for polyethylene, high density, granulate | polyethylene, high density, granulate | Cutoff, S - GLO	0.0703395	kg CO2 eq (long)		0.0238	0	Football Stadium: Consturction of Piping System - NO	0.730621	kg CO2 eq (short)		0.0176		Football Stadium: Consturction of Piping System - NO	0.674104	kg CO2 eq (long)
		0.0018	market for waste reinforced concrete | waste reinforced concrete | Cutoff, S - Europe without Switzerland	0.0453695	kg CO2 eq (long)			0.0052	market for polypropylene, granulate | polypropylene, granulate | Cutoff, S - GLO	0.0689762	kg CO2 eq (long)			0.0103	market for gravel, round | gravel, round | Cutoff, S - RoW	0.314696	kg CO2 eq (short)			0.0077	market for gravel, round | gravel, round | Cutoff, S - RoW	0.293956	kg CO2 eq (long)
		0.0001	market for scrap steel | scrap steel | Cutoff, S - Europe without Switzerland	0.00240083	kg CO2 eq (long)			0.0013	extrusion, plastic pipes | extrusion, plastic pipes | Cutoff, S - RER	0.0168372	kg CO2 eq (long)			0.0076	diesel, burned in building machine | diesel, burned in building machine | Cutoff, S - GLO	0.234081	kg CO2 eq (short)			0.0058	diesel, burned in building machine | diesel, burned in building machine | Cutoff, S - GLO	0.220162	kg CO2 eq (long)
	0.0554	0	Football Stadium: Construction of Groundworks - Natural Turf - NO	1.36988	kg CO2 eq (long)			0.0003	market for concrete, normal strength | concrete, normal strength | Cutoff, S - RoW	0.00383131	kg CO2 eq (long)			0.0026	market for polyethylene, high density, granulate | polyethylene, high density, granulate | Cutoff, S - GLO	0.0804963	kg CO2 eq (short)			0.0018	market for polyethylene, high density, granulate | polyethylene, high density, granulate | Cutoff, S - GLO	0.0703395	kg CO2 eq (long)
		0.0339	treatment of biowaste by anaerobic digestion | biowaste | Cutoff, S - RoW	0.83855	kg CO2 eq (long)		0.0323	0	Maintenance: Artificial Gras	0.430175	kg CO2 eq (long)			0.0026	market for polypropylene, granulate | polypropylene, granulate | Cutoff, S - GLO	0.0795592	kg CO2 eq (short)			0.0018	market for polypropylene, granulate | polypropylene, granulate | Cutoff, S - GLO	0.0689762	kg CO2 eq (long)
		0.0215	diesel, burned in building machine | diesel, burned in building machine | Cutoff, S - GLO	0.531329	kg CO2 eq (long)			0.0168	diesel, burned in building machine | diesel, burned in building machine | Cutoff, S - GLO	0.224567	kg CO2 eq (long)			0.0006	extrusion, plastic pipes | extrusion, plastic pipes | Cutoff, S - RER	0.0177967	kg CO2 eq (short)			0.0004	extrusion, plastic pipes | extrusion, plastic pipes | Cutoff, S - RER	0.0168372	kg CO2 eq (long)
	0.0546	0	Football Stadium: Consturction of Piping System - NO	1.34821	kg CO2 eq (long)			0.0077	treatment of municipal solid waste, incineration | municipal solid waste | Cutoff, S - NO	0.10284	kg CO2 eq (long)			0.0001	market for concrete, normal strength | concrete, normal strength | Cutoff, S - RoW	0.00399033	kg CO2 eq (short)			0.0001	market for concrete, normal strength | concrete, normal strength | Cutoff, S - RoW	0.00383131	kg CO2 eq (long)
		0.0238	market for gravel, round | gravel, round | Cutoff, S - RoW	0.587912	kg CO2 eq (long)			0.0073	market for irrigation | irrigation | Cutoff, S - DE	0.097674	kg CO2 eq (long)		0.0148	0	Maintenance: Artificial Gras	0.454017	kg CO2 eq (short)		0.0112		Maintenance: Artificial Gras	0.430175	kg CO2 eq (long)
		0.0178	diesel, burned in building machine | diesel, burned in building machine | Cutoff, S - GLO	0.440325	kg CO2 eq (long)			0.0004	treatment of biowaste by anaerobic digestion | biowaste | Cutoff, S - RoW	0.00485161	kg CO2 eq (long)			0.0078	diesel, burned in building machine | diesel, burned in building machine | Cutoff, S - GLO	0.238763	kg CO2 eq (short)			0.0059	diesel, burned in building machine | diesel, burned in building machine | Cutoff, S - GLO	0.224567	kg CO2 eq (long)
		0.0057	market for polyethylene, high density, granulate | polyethylene, high density, granulate | Cutoff, S - GLO	0.140679	kg CO2 eq (long)			0	market for electricity, medium voltage | electricity, medium voltage | Cutoff, S - NO	0.000242206	kg CO2 eq (long)			0.0034	market for irrigation | irrigation | Cutoff, S - DE	0.103246	kg CO2 eq (short)			0.0027	treatment of municipal solid waste, incineration | municipal solid waste | Cutoff, S - NO	0.10284	kg CO2 eq (long)
		0.0056	market for polypropylene, granulate | polypropylene, granulate | Cutoff, S - GLO	0.137952	kg CO2 eq (long)		0.0322	0	GoE - Wood-Based Infill	0.428975	kg CO2 eq (long)			0.0034	treatment of municipal solid waste, incineration | municipal solid waste | Cutoff, S - NO	0.103206	kg CO2 eq (short)			0.0026	market for irrigation | irrigation | Cutoff, S - DE	0.097674	kg CO2 eq (long)
		0.0014	extrusion, plastic pipes | extrusion, plastic pipes | Cutoff, S - RER	0.0336745	kg CO2 eq (long)			0.0275	Birch wood infill	0.366406	kg CO2 eq (long)			0.0003	treatment of biowaste by anaerobic digestion | biowaste | Cutoff, S - RoW	0.00855419	kg CO2 eq (short)			0.0001	treatment of biowaste by anaerobic digestion | biowaste | Cutoff, S - RoW	0.00485161	kg CO2 eq (long)
		0.0003	market for concrete, normal strength | concrete, normal strength | Cutoff, S - RoW	0.00766262	kg CO2 eq (long)			0.0047	treatment of waste wood, untreated, municipal incineration | waste wood, untreated | Cutoff, S - RoW	0.0625682	kg CO2 eq (long)			0	market for electricity, medium voltage | electricity, medium voltage | Cutoff, S - NO	0.000246824	kg CO2 eq (short)			0	market for electricity, medium voltage | electricity, medium voltage | Cutoff, S - NO	0.000242206	kg CO2 eq (long)
	0.0387	0	Football Stadium: Construction of the Drainage Layer - NO	0.956325	kg CO2 eq (long)		0.0166	0	Construction of Artificial Gras	0.220812	kg CO2 eq (long)		0.0079	0	Construction of Artificial Gras	0.24235	kg CO2 eq (short)		0.0058		Construction of Artificial Gras	0.220812	kg CO2 eq (long)
		0.0306	market for sand | sand | Cutoff, S - RoW	0.757296	kg CO2 eq (long)			0.0085	market for silica sand | silica sand | Cutoff, S - GLO	0.113051	kg CO2 eq (long)			0.0039	market for silica sand | silica sand | Cutoff, S - GLO	0.120968	kg CO2 eq (short)			0.003	market for silica sand | silica sand | Cutoff, S - GLO	0.113051	kg CO2 eq (long)
		0.0081	diesel, burned in building machine | diesel, burned in building machine | Cutoff, S - GLO	0.199028	kg CO2 eq (long)			0.0032	diesel, burned in building machine | diesel, burned in building machine | Cutoff, S - GLO	0.0425649	kg CO2 eq (long)			0.0015	diesel, burned in building machine | diesel, burned in building machine | Cutoff, S - GLO	0.0452558	kg CO2 eq (short)			0.0011	diesel, burned in building machine | diesel, burned in building machine | Cutoff, S - GLO	0.0425649	kg CO2 eq (long)
	0.0264	0	Renovation: Natural Turf	0.653379	kg CO2 eq (long)			0.0025	polyethylene production, high density, granulate | polyethylene, high density, granulate | Cutoff, S - RER	0.0328969	kg CO2 eq (long)			0.0012	polyethylene production, high density, granulate | polyethylene, high density, granulate | Cutoff, S - RER	0.0382063	kg CO2 eq (short)			0.0009	polyethylene production, high density, granulate | polyethylene, high density, granulate | Cutoff, S - RER	0.0328969	kg CO2 eq (long)
		0.0212	treatment of biowaste by anaerobic digestion | biowaste | Cutoff, S - RoW	0.524692	kg CO2 eq (long)			0.0024	polypropylene production, granulate | polypropylene, granulate | Cutoff, S - RER	0.0323	kg CO2 eq (long)			0.0012	polypropylene production, granulate | polypropylene, granulate | Cutoff, S - RER	0.0379192	kg CO2 eq (short)			0.0008	polypropylene production, granulate | polypropylene, granulate | Cutoff, S - RER	0.0323	kg CO2 eq (long)
		0.0035	diesel, burned in building machine | diesel, burned in building machine | Cutoff, S - GLO	0.0854234	kg CO2 eq (long)
		0.0018	Construction of natural gras	0.0432612	kg CO2 eq (long)
	0.0175	0	Construction of natural gras	0.432613	kg CO2 eq (long)
		0.0069	diesel, burned in building machine | diesel, burned in building machine | Cutoff, S - GLO	0.170553	kg CO2 eq (long)
		0.0037	market for inorganic phosphorus fertiliser, as P2O5 | inorganic phosphorus fertiliser, as P2O5 | Cutoff, S - NO	0.0920119	kg CO2 eq (long)
		0.0016	market for inorganic nitrogen fertiliser, as N | inorganic nitrogen fertiliser, as N | Cutoff, S - NO	0.0398255	kg CO2 eq (long)
		0.0007	market for inorganic potassium fertiliser, as K2O | inorganic potassium fertiliser, as K2O | Cutoff, S - NO	0.0176546	kg CO2 eq (long)
		0.0006	market for grass seed, organic, for sowing | grass seed, organic, for sowing | Cutoff, S - GLO	0.0150331	kg CO2 eq (long)
		0.0005	irrigation, sprinkler | irrigation | Cutoff, S - DE	0.0127811	kg CO2 eq (long)

## Sheet: CC_short
Natural Gras							Wood-Based Infill							ELT - Base							EPDM - Base
Percentual Contribution			Process	Amount	Unit		Percentual Contribution			Process	Amount	Unit		Percentual Contribution			Process	Amount	Unit		Percentual Contribution			Process	Amount	Unit
1			Natural Gras - Benchmark	28.4529	kg CO2 eq (short)		1			GOE - Wood based infill	14.8311	kg CO2 eq (short)		1			Artificial Gras - ELT - Base Case	30.6617	kg CO2 eq (short)		1			Artificial Gras - EPDM - Base Case	41.219	kg CO2 eq (short)
	0.5128		Maintenance: Natural Gras	14.5909	kg CO2 eq (short)			0.2647		Construction of the base layer - Football Pitch - Artificial Turf	3.92638	kg CO2 eq (short)			0.5313		ELT - Base Case	16.289	kg CO2 eq (short)			0.6513		EPDM - Base Case	26.8465	kg CO2 eq (short)
		0.1189	treatment of biowaste by anaerobic digestion | biowaste | Cutoff, S - RoW	3.38366	kg CO2 eq (short)				0.1563	mastic asphalt production | mastic asphalt | Cutoff, S - RoW	2.31779	kg CO2 eq (short)				0.4979	treatment of waste rubber, unspecified, municipal incineration | waste rubber, unspecified | Cutoff, S - Europe without Switzerland	15.265	kg CO2 eq (short)				0.3536	treatment of waste rubber, unspecified, municipal incineration | waste rubber, unspecified | Cutoff, S - Europe without Switzerland	14.5766	kg CO2 eq (short)
		0.0704	diesel, burned in building machine | diesel, burned in building machine | Cutoff, S - GLO	2.00374	kg CO2 eq (short)				0.0908	market for gravel, crushed | gravel, crushed | Cutoff, S - RoW	1.34736	kg CO2 eq (short)				0.0334	Production of ELT	1.024	kg CO2 eq (short)				0.2977	synthetic rubber production | synthetic rubber | Cutoff, S - RER	12.2698	kg CO2 eq (short)
		0.0674	market for inorganic nitrogen fertiliser, as N | inorganic nitrogen fertiliser, as N | Cutoff, S - NO	1.91795	kg CO2 eq (short)				0.0113	diesel, burned in building machine | diesel, burned in building machine | Cutoff, S - GLO	0.166978	kg CO2 eq (short)			0.1281	0	Construction of the base layer - Football Pitch - Artificial Turf	3.92638	kg CO2 eq (short)			0.0953		Construction of the base layer - Football Pitch - Artificial Turf	3.92638	kg CO2 eq (short)
		0.0398	market for inorganic potassium fertiliser, as K2O | inorganic potassium fertiliser, as K2O | Cutoff, S - NO	1.13372	kg CO2 eq (short)				0.0047	market for sand | sand | Cutoff, S - RoW	0.0699689	kg CO2 eq (short)				0.0756	mastic asphalt production | mastic asphalt | Cutoff, S - RoW	2.31779	kg CO2 eq (short)				0.0562	mastic asphalt production | mastic asphalt | Cutoff, S - RoW	2.31779	kg CO2 eq (short)
		0.0313	market for grass seed, organic, for sowing | grass seed, organic, for sowing | Cutoff, S - GLO	0.891163	kg CO2 eq (short)				0.0016	concrete block production | concrete block | Cutoff, S - RoW	0.0242663	kg CO2 eq (short)				0.0439	market for gravel, crushed | gravel, crushed | Cutoff, S - RoW	1.34736	kg CO2 eq (short)				0.0327	market for gravel, crushed | gravel, crushed | Cutoff, S - RoW	1.34736	kg CO2 eq (short)
		0.0228	market for irrigation | irrigation | Cutoff, S - DE	0.647563	kg CO2 eq (short)			0.2545	0	Renovation: Artificial Turf	3.77404	kg CO2 eq (short)				0.0054	diesel, burned in building machine | diesel, burned in building machine | Cutoff, S - GLO	0.166978	kg CO2 eq (short)				0.0041	diesel, burned in building machine | diesel, burned in building machine | Cutoff, S - GLO	0.166978	kg CO2 eq (short)
		0.0117	market for sand | sand | Cutoff, S - CH	0.332331	kg CO2 eq (short)				0.1241	treatment of waste plastic, mixture, municipal incineration | waste plastic, mixture | Cutoff, S - RoW	1.84082	kg CO2 eq (short)				0.0023	market for sand | sand | Cutoff, S - RoW	0.0699689	kg CO2 eq (short)				0.0017	market for sand | sand | Cutoff, S - RoW	0.0699689	kg CO2 eq (short)
		0.0116	market for alkyd paint, white, without solvent, in 60% solution state | alkyd paint, white, without solvent, in 60% solution state | Cutoff, S - RER	0.330575	kg CO2 eq (short)				0.0515	polyethylene production, high density, granulate | polyethylene, high density, granulate | Cutoff, S - RER	0.764125	kg CO2 eq (short)				0.0008	concrete block production | concrete block | Cutoff, S - RoW	0.0242663	kg CO2 eq (short)				0.0006	concrete block production | concrete block | Cutoff, S - RoW	0.0242663	kg CO2 eq (short)
		0.0104	market for inorganic phosphorus fertiliser, as P2O5 | inorganic phosphorus fertiliser, as P2O5 | Cutoff, S - NO	0.295424	kg CO2 eq (short)				0.0511	polypropylene production, granulate | polypropylene, granulate | Cutoff, S - RER	0.758383	kg CO2 eq (short)			0.1231	0	Renovation: Artificial Turf	3.77404	kg CO2 eq (short)			0.0916		Renovation: Artificial Turf	3.77404	kg CO2 eq (short)
		0.0089	Construction of natural gras	0.254187	kg CO2 eq (short)				0.0143	diesel, burned in building machine | diesel, burned in building machine | Cutoff, S - GLO	0.21161	kg CO2 eq (short)				0.06	treatment of waste plastic, mixture, municipal incineration | waste plastic, mixture | Cutoff, S - RoW	1.84082	kg CO2 eq (short)				0.0447	treatment of waste plastic, mixture, municipal incineration | waste plastic, mixture | Cutoff, S - RoW	1.84082	kg CO2 eq (short)
		0.0039	treatment of municipal solid waste, incineration | municipal solid waste | Cutoff, S - NO	0.110474	kg CO2 eq (short)				0.0134	silica sand production | silica sand | Cutoff, S - RoW	0.199103	kg CO2 eq (short)				0.0249	polyethylene production, high density, granulate | polyethylene, high density, granulate | Cutoff, S - RER	0.764125	kg CO2 eq (short)				0.0185	polyethylene production, high density, granulate | polyethylene, high density, granulate | Cutoff, S - RER	0.764125	kg CO2 eq (short)
		0.0014	market for pesticide, unspecified | pesticide, unspecified | Cutoff, S - GLO	0.0392968	kg CO2 eq (short)			0.1766		Football Stadium: Construction of Groundworks - Artificial Turf - NO	2.61915	kg CO2 eq (short)				0.0247	polypropylene production, granulate | polypropylene, granulate | Cutoff, S - RER	0.758383	kg CO2 eq (short)				0.0184	polypropylene production, granulate | polypropylene, granulate | Cutoff, S - RER	0.758383	kg CO2 eq (short)
		0.0003	market for steel, low-alloyed, hot rolled | steel, low-alloyed, hot rolled | Cutoff, S - GLO	0.00758375	kg CO2 eq (short)				0.1015	market for quicklime, milled, packed | quicklime, milled, packed | Cutoff, S - RER	1.50535	kg CO2 eq (short)				0.0069	diesel, burned in building machine | diesel, burned in building machine | Cutoff, S - GLO	0.21161	kg CO2 eq (short)				0.0051	diesel, burned in building machine | diesel, burned in building machine | Cutoff, S - GLO	0.21161	kg CO2 eq (short)
		0.0002	market for fosetyl-Al | fosetyl-Al | Cutoff, S - GLO	0.00454532	kg CO2 eq (short)				0.0498	treatment of biowaste by anaerobic digestion | biowaste | Cutoff, S - RoW	0.739252	kg CO2 eq (short)				0.0065	silica sand production | silica sand | Cutoff, S - RoW	0.199103	kg CO2 eq (short)				0.0048	silica sand production | silica sand | Cutoff, S - RoW	0.199103	kg CO2 eq (short)
		0.0001	market for chlorothalonil | chlorothalonil | Cutoff, S - GLO	0.00369293	kg CO2 eq (short)				0.0253	diesel, burned in building machine | diesel, burned in building machine | Cutoff, S - GLO	0.374531	kg CO2 eq (short)			0.0854	0	Football Stadium: Construction of Groundworks - Artificial Turf - NO	2.61915	kg CO2 eq (short)			0.0635		Football Stadium: Construction of Groundworks - Artificial Turf - NO	2.61915	kg CO2 eq (short)
		0	market for electricity, medium voltage | electricity, medium voltage | Cutoff, S - NO	0.000640166	kg CO2 eq (short)			0.0942		Football Stadium: Infrastructure, Lights, Fence and Mowing edges	1.39644	kg CO2 eq (short)				0.0491	market for quicklime, milled, packed | quicklime, milled, packed | Cutoff, S - RER	1.50535	kg CO2 eq (short)				0.0365	market for quicklime, milled, packed | quicklime, milled, packed | Cutoff, S - RER	1.50535	kg CO2 eq (short)
		0	market for tap water | tap water | Cutoff, S - Europe without Switzerland	0.00053977	kg CO2 eq (short)				0.0395	market for concrete, normal strength | concrete, normal strength | Cutoff, S - AT	0.585658	kg CO2 eq (short)				0.0241	treatment of biowaste by anaerobic digestion | biowaste | Cutoff, S - RoW	0.739252	kg CO2 eq (short)				0.0179	treatment of biowaste by anaerobic digestion | biowaste | Cutoff, S - RoW	0.739252	kg CO2 eq (short)
	0.1004		Construction of the base layer - Football Pitch - Natural Turf	2.85572	kg CO2 eq (short)				0.0128	market for steel, low-alloyed | steel, low-alloyed | Cutoff, S - GLO	0.189363	kg CO2 eq (short)				0.0122	diesel, burned in building machine | diesel, burned in building machine | Cutoff, S - GLO	0.374531	kg CO2 eq (short)				0.0091	diesel, burned in building machine | diesel, burned in building machine | Cutoff, S - GLO	0.374531	kg CO2 eq (short)
		0.0916	market for silica sand | silica sand | Cutoff, S - GLO	2.60754	kg CO2 eq (short)				0.0123	market for reinforcing steel | reinforcing steel | Cutoff, S - GLO	0.1829	kg CO2 eq (short)			0.0455	0	Football Stadium: Infrastructure, Lights, Fence and Mowing edges	1.39644	kg CO2 eq (short)			0.0339		Football Stadium: Infrastructure, Lights, Fence and Mowing edges	1.39644	kg CO2 eq (short)
		0.008	diesel, burned in building machine | diesel, burned in building machine | Cutoff, S - GLO	0.226591	kg CO2 eq (short)				0.0069	aluminium production, primary, ingot | aluminium, primary, ingot | Cutoff, S - IAI Area, EU27 & EFTA	0.101777	kg CO2 eq (short)				0.0191	market for concrete, normal strength | concrete, normal strength | Cutoff, S - AT	0.585658	kg CO2 eq (short)				0.0142	market for concrete, normal strength | concrete, normal strength | Cutoff, S - AT	0.585658	kg CO2 eq (short)
		0.0008	limestone production, crushed, washed | limestone, crushed, washed | Cutoff, S - RoW	0.021584	kg CO2 eq (short)				0.0053	electronic component production, passive, unspecified | electronic component, passive, unspecified | Cutoff, S - GLO	0.0784653	kg CO2 eq (short)				0.0062	market for steel, low-alloyed | steel, low-alloyed | Cutoff, S - GLO	0.189363	kg CO2 eq (short)				0.0046	market for steel, low-alloyed | steel, low-alloyed | Cutoff, S - GLO	0.189363	kg CO2 eq (short)
	0.0982		Football Stadium: Infrastructure, Lights, Fence and Mowing edges	2.79287	kg CO2 eq (short)				0.0045	market for polyethylene, high density, granulate | polyethylene, high density, granulate | Cutoff, S - GLO	0.0670803	kg CO2 eq (short)				0.006	market for reinforcing steel | reinforcing steel | Cutoff, S - GLO	0.1829	kg CO2 eq (short)				0.0044	market for reinforcing steel | reinforcing steel | Cutoff, S - GLO	0.1829	kg CO2 eq (short)
		0.0412	market for concrete, normal strength | concrete, normal strength | Cutoff, S - AT	1.17132	kg CO2 eq (short)				0.0035	metal working, average for aluminium product manufacturing | metal working, average for aluminium product manufacturing | Cutoff, S - RER	0.0526207	kg CO2 eq (short)				0.0033	aluminium production, primary, ingot | aluminium, primary, ingot | Cutoff, S - IAI Area, EU27 & EFTA	0.101777	kg CO2 eq (short)				0.0025	aluminium production, primary, ingot | aluminium, primary, ingot | Cutoff, S - IAI Area, EU27 & EFTA	0.101777	kg CO2 eq (short)
		0.0133	market for steel, low-alloyed | steel, low-alloyed | Cutoff, S - GLO	0.378726	kg CO2 eq (short)				0.0032	concrete block production | concrete block | Cutoff, S - DE	0.0481866	kg CO2 eq (short)				0.0026	electronic component production, passive, unspecified | electronic component, passive, unspecified | Cutoff, S - GLO	0.0784653	kg CO2 eq (short)				0.0019	electronic component production, passive, unspecified | electronic component, passive, unspecified | Cutoff, S - GLO	0.0784653	kg CO2 eq (short)
		0.0129	market for reinforcing steel | reinforcing steel | Cutoff, S - GLO	0.3658	kg CO2 eq (short)				0.0027	diesel, burned in building machine | diesel, burned in building machine | Cutoff, S - GLO	0.0393257	kg CO2 eq (short)				0.0022	market for polyethylene, high density, granulate | polyethylene, high density, granulate | Cutoff, S - GLO	0.0670803	kg CO2 eq (short)				0.0016	market for polyethylene, high density, granulate | polyethylene, high density, granulate | Cutoff, S - GLO	0.0670803	kg CO2 eq (short)
		0.0072	aluminium production, primary, ingot | aluminium, primary, ingot | Cutoff, S - IAI Area, EU27 & EFTA	0.203554	kg CO2 eq (short)				0.0022	market for polypropylene, granulate | polypropylene, granulate | Cutoff, S - GLO	0.0331497	kg CO2 eq (short)				0.0017	metal working, average for aluminium product manufacturing | metal working, average for aluminium product manufacturing | Cutoff, S - RER	0.0526207	kg CO2 eq (short)				0.0013	metal working, average for aluminium product manufacturing | metal working, average for aluminium product manufacturing | Cutoff, S - RER	0.0526207	kg CO2 eq (short)
		0.0055	electronic component production, passive, unspecified | electronic component, passive, unspecified | Cutoff, S - GLO	0.156931	kg CO2 eq (short)				0.0012	market for extrusion, plastic pipes | extrusion, plastic pipes | Cutoff, S - GLO	0.0179095	kg CO2 eq (short)				0.0016	concrete block production | concrete block | Cutoff, S - DE	0.0481866	kg CO2 eq (short)				0.0012	concrete block production | concrete block | Cutoff, S - DE	0.0481866	kg CO2 eq (short)
		0.0047	market for polyethylene, high density, granulate | polyethylene, high density, granulate | Cutoff, S - GLO	0.134161	kg CO2 eq (short)			0.0829		Demolition of a football pitch: Artificial Gras	1.22967	kg CO2 eq (short)				0.0013	diesel, burned in building machine | diesel, burned in building machine | Cutoff, S - GLO	0.0393257	kg CO2 eq (short)				0.001	diesel, burned in building machine | diesel, burned in building machine | Cutoff, S - GLO	0.0393257	kg CO2 eq (short)
		0.0037	metal working, average for aluminium product manufacturing | metal working, average for aluminium product manufacturing | Cutoff, S - RER	0.105241	kg CO2 eq (short)				0.0365	market for waste polypropylene | waste polypropylene | Cutoff, S - NO	0.541152	kg CO2 eq (short)				0.0011	market for polypropylene, granulate | polypropylene, granulate | Cutoff, S - GLO	0.0331497	kg CO2 eq (short)				0.0008	market for polypropylene, granulate | polypropylene, granulate | Cutoff, S - GLO	0.0331497	kg CO2 eq (short)
		0.0034	concrete block production | concrete block | Cutoff, S - DE	0.0963731	kg CO2 eq (short)				0.0232	treatment of waste asphalt, sanitary landfill | waste asphalt | Cutoff, S - RoW	0.344733	kg CO2 eq (short)				0.0006	market for extrusion, plastic pipes | extrusion, plastic pipes | Cutoff, S - GLO	0.0179095	kg CO2 eq (short)				0.0004	market for extrusion, plastic pipes | extrusion, plastic pipes | Cutoff, S - GLO	0.0179095	kg CO2 eq (short)
		0.0028	diesel, burned in building machine | diesel, burned in building machine | Cutoff, S - GLO	0.0786514	kg CO2 eq (short)				0.0117	diesel, burned in building machine | diesel, burned in building machine | Cutoff, S - GLO	0.17322	kg CO2 eq (short)			0.0401	0	Demolition of a football pitch: Artificial Gras	1.22967	kg CO2 eq (short)			0.0298		Demolition of a football pitch: Artificial Gras	1.22967	kg CO2 eq (short)
		0.0023	market for polypropylene, granulate | polypropylene, granulate | Cutoff, S - GLO	0.0662993	kg CO2 eq (short)				0.0063	market for waste polyethylene | waste polyethylene | Cutoff, S - NO	0.094033	kg CO2 eq (short)				0.0176	market for waste polypropylene | waste polypropylene | Cutoff, S - NO	0.541152	kg CO2 eq (short)				0.0131	market for waste polypropylene | waste polypropylene | Cutoff, S - NO	0.541152	kg CO2 eq (short)
		0.0013	market for extrusion, plastic pipes | extrusion, plastic pipes | Cutoff, S - GLO	0.035819	kg CO2 eq (short)				0.0034	market for waste concrete | waste concrete | Cutoff, S - Europe without Switzerland	0.0507524	kg CO2 eq (short)				0.0112	treatment of waste asphalt, sanitary landfill | waste asphalt | Cutoff, S - RoW	0.344733	kg CO2 eq (short)				0.0084	treatment of waste asphalt, sanitary landfill | waste asphalt | Cutoff, S - RoW	0.344733	kg CO2 eq (short)
	0.0763		Demolition of a football pitch: Natural Gras	2.17012	kg CO2 eq (short)				0.0016	market for waste reinforced concrete | waste reinforced concrete | Cutoff, S - Europe without Switzerland	0.0244456	kg CO2 eq (short)				0.0056	diesel, burned in building machine | diesel, burned in building machine | Cutoff, S - GLO	0.17322	kg CO2 eq (short)				0.0042	diesel, burned in building machine | diesel, burned in building machine | Cutoff, S - GLO	0.17322	kg CO2 eq (short)
		0.0284	treatment of inert waste, sanitary landfill | inert waste | Cutoff, S - Europe without Switzerland	0.807567	kg CO2 eq (short)				0.0001	market for scrap steel | scrap steel | Cutoff, S - Europe without Switzerland	0.00133002	kg CO2 eq (short)				0.0031	market for waste polyethylene | waste polyethylene | Cutoff, S - NO	0.094033	kg CO2 eq (short)				0.0023	market for waste polyethylene | waste polyethylene | Cutoff, S - NO	0.094033	kg CO2 eq (short)
		0.0217	market for waste concrete | waste concrete | Cutoff, S - Europe without Switzerland	0.617463	kg CO2 eq (short)			0.0493		Football Stadium: Consturction of Piping System - NO	0.730621	kg CO2 eq (short)				0.0017	market for waste concrete | waste concrete | Cutoff, S - Europe without Switzerland	0.0507524	kg CO2 eq (short)				0.0012	market for waste concrete | waste concrete | Cutoff, S - Europe without Switzerland	0.0507524	kg CO2 eq (short)
		0.0122	diesel, burned in building machine | diesel, burned in building machine | Cutoff, S - GLO	0.346441	kg CO2 eq (short)				0.0212	market for gravel, round | gravel, round | Cutoff, S - RoW	0.314696	kg CO2 eq (short)				0.0008	market for waste reinforced concrete | waste reinforced concrete | Cutoff, S - Europe without Switzerland	0.0244456	kg CO2 eq (short)				0.0006	market for waste reinforced concrete | waste reinforced concrete | Cutoff, S - Europe without Switzerland	0.0244456	kg CO2 eq (short)
		0.0066	market for waste polyethylene | waste polyethylene | Cutoff, S - NO	0.188066	kg CO2 eq (short)				0.0158	diesel, burned in building machine | diesel, burned in building machine | Cutoff, S - GLO	0.234081	kg CO2 eq (short)				0	market for scrap steel | scrap steel | Cutoff, S - Europe without Switzerland	0.00133002	kg CO2 eq (short)				0	market for scrap steel | scrap steel | Cutoff, S - Europe without Switzerland	0.00133002	kg CO2 eq (short)
		0.0056	market for waste polypropylene | waste polypropylene | Cutoff, S - NO	0.159033	kg CO2 eq (short)				0.0054	market for polyethylene, high density, granulate | polyethylene, high density, granulate | Cutoff, S - GLO	0.0804963	kg CO2 eq (short)			0.0238	0	Football Stadium: Consturction of Piping System - NO	0.730621	kg CO2 eq (short)			0.0177		Football Stadium: Consturction of Piping System - NO	0.730621	kg CO2 eq (short)
		0.0017	market for waste reinforced concrete | waste reinforced concrete | Cutoff, S - Europe without Switzerland	0.0488912	kg CO2 eq (short)				0.0054	market for polypropylene, granulate | polypropylene, granulate | Cutoff, S - GLO	0.0795592	kg CO2 eq (short)				0.0103	market for gravel, round | gravel, round | Cutoff, S - RoW	0.314696	kg CO2 eq (short)				0.0076	market for gravel, round | gravel, round | Cutoff, S - RoW	0.314696	kg CO2 eq (short)
		0.0001	market for scrap steel | scrap steel | Cutoff, S - Europe without Switzerland	0.00266003	kg CO2 eq (short)				0.0012	extrusion, plastic pipes | extrusion, plastic pipes | Cutoff, S - RER	0.0177967	kg CO2 eq (short)				0.0076	diesel, burned in building machine | diesel, burned in building machine | Cutoff, S - GLO	0.234081	kg CO2 eq (short)				0.0057	diesel, burned in building machine | diesel, burned in building machine | Cutoff, S - GLO	0.234081	kg CO2 eq (short)
	0.0718		Football Stadium: Construction of Groundworks - Natural Turf - NO	2.04342	kg CO2 eq (short)				0.0003	market for concrete, normal strength | concrete, normal strength | Cutoff, S - RoW	0.00399033	kg CO2 eq (short)				0.0026	market for polyethylene, high density, granulate | polyethylene, high density, granulate | Cutoff, S - GLO	0.0804963	kg CO2 eq (short)				0.002	market for polyethylene, high density, granulate | polyethylene, high density, granulate | Cutoff, S - GLO	0.0804963	kg CO2 eq (short)
		0.052	treatment of biowaste by anaerobic digestion | biowaste | Cutoff, S - RoW	1.4785	kg CO2 eq (short)			0.0309		GoE - Wood-Based Infill	0.458508	kg CO2 eq (short)				0.0026	market for polypropylene, granulate | polypropylene, granulate | Cutoff, S - GLO	0.0795592	kg CO2 eq (short)				0.0019	market for polypropylene, granulate | polypropylene, granulate | Cutoff, S - GLO	0.0795592	kg CO2 eq (short)
		0.0199	diesel, burned in building machine | diesel, burned in building machine | Cutoff, S - GLO	0.564917	kg CO2 eq (short)				0.0265	Birch wood infill	0.392625	kg CO2 eq (short)				0.0006	extrusion, plastic pipes | extrusion, plastic pipes | Cutoff, S - RER	0.0177967	kg CO2 eq (short)				0.0004	extrusion, plastic pipes | extrusion, plastic pipes | Cutoff, S - RER	0.0177967	kg CO2 eq (short)
	0.0514		Football Stadium: Consturction of Piping System - NO	1.46124	kg CO2 eq (short)				0.0044	treatment of waste wood, untreated, municipal incineration | waste wood, untreated | Cutoff, S - RoW	0.0658834	kg CO2 eq (short)				0.0001	market for concrete, normal strength | concrete, normal strength | Cutoff, S - RoW	0.00399033	kg CO2 eq (short)				0.0001	market for concrete, normal strength | concrete, normal strength | Cutoff, S - RoW	0.00399033	kg CO2 eq (short)
		0.0221	market for gravel, round | gravel, round | Cutoff, S - RoW	0.629392	kg CO2 eq (short)			0.0306		Maintenance: Artificial Gras	0.454017	kg CO2 eq (short)			0.0148	0	Maintenance: Artificial Gras	0.454017	kg CO2 eq (short)			0.011		Maintenance: Artificial Gras	0.454017	kg CO2 eq (short)
		0.0165	diesel, burned in building machine | diesel, burned in building machine | Cutoff, S - GLO	0.468162	kg CO2 eq (short)				0.0161	diesel, burned in building machine | diesel, burned in building machine | Cutoff, S - GLO	0.238763	kg CO2 eq (short)				0.0078	diesel, burned in building machine | diesel, burned in building machine | Cutoff, S - GLO	0.238763	kg CO2 eq (short)				0.0058	diesel, burned in building machine | diesel, burned in building machine | Cutoff, S - GLO	0.238763	kg CO2 eq (short)
		0.0057	market for polyethylene, high density, granulate | polyethylene, high density, granulate | Cutoff, S - GLO	0.160993	kg CO2 eq (short)				0.007	market for irrigation | irrigation | Cutoff, S - DE	0.103246	kg CO2 eq (short)				0.0034	market for irrigation | irrigation | Cutoff, S - DE	0.103246	kg CO2 eq (short)				0.0025	market for irrigation | irrigation | Cutoff, S - DE	0.103246	kg CO2 eq (short)
		0.0056	market for polypropylene, granulate | polypropylene, granulate | Cutoff, S - GLO	0.159118	kg CO2 eq (short)				0.007	treatment of municipal solid waste, incineration | municipal solid waste | Cutoff, S - NO	0.103206	kg CO2 eq (short)				0.0034	treatment of municipal solid waste, incineration | municipal solid waste | Cutoff, S - NO	0.103206	kg CO2 eq (short)				0.0025	treatment of municipal solid waste, incineration | municipal solid waste | Cutoff, S - NO	0.103206	kg CO2 eq (short)
		0.0013	extrusion, plastic pipes | extrusion, plastic pipes | Cutoff, S - RER	0.0355935	kg CO2 eq (short)				0.0006	treatment of biowaste by anaerobic digestion | biowaste | Cutoff, S - RoW	0.00855419	kg CO2 eq (short)				0.0003	treatment of biowaste by anaerobic digestion | biowaste | Cutoff, S - RoW	0.00855419	kg CO2 eq (short)				0.0002	treatment of biowaste by anaerobic digestion | biowaste | Cutoff, S - RoW	0.00855419	kg CO2 eq (short)
		0.0003	market for concrete, normal strength | concrete, normal strength | Cutoff, S - RoW	0.00798067	kg CO2 eq (short)				0	market for electricity, medium voltage | electricity, medium voltage | Cutoff, S - NO	0.000246824	kg CO2 eq (short)				0	market for electricity, medium voltage | electricity, medium voltage | Cutoff, S - NO	0.000246824	kg CO2 eq (short)				0	market for electricity, medium voltage | electricity, medium voltage | Cutoff, S - NO	0.000246824	kg CO2 eq (short)
	0.0373		Renovation: Natural Turf	1.0615	kg CO2 eq (short)			0.0163	0	Construction of Artificial Gras	0.24235	kg CO2 eq (short)			0.0079	0	Construction of Artificial Gras	0.24235	kg CO2 eq (short)			0.0059		Construction of Artificial Gras	0.24235	kg CO2 eq (short)
		0.0325	treatment of biowaste by anaerobic digestion | biowaste | Cutoff, S - RoW	0.925121	kg CO2 eq (short)				0.0082	market for silica sand | silica sand | Cutoff, S - GLO	0.120968	kg CO2 eq (short)				0.0039	market for silica sand | silica sand | Cutoff, S - GLO	0.120968	kg CO2 eq (short)				0.0029	market for silica sand | silica sand | Cutoff, S - GLO	0.120968	kg CO2 eq (short)
		0.0032	diesel, burned in building machine | diesel, burned in building machine | Cutoff, S - GLO	0.0908237	kg CO2 eq (short)				0.0031	diesel, burned in building machine | diesel, burned in building machine | Cutoff, S - GLO	0.0452558	kg CO2 eq (short)				0.0015	diesel, burned in building machine | diesel, burned in building machine | Cutoff, S - GLO	0.0452558	kg CO2 eq (short)				0.0011	diesel, burned in building machine | diesel, burned in building machine | Cutoff, S - GLO	0.0452558	kg CO2 eq (short)
		0.0016	Construction of natural gras	0.0455532	kg CO2 eq (short)				0.0026	polyethylene production, high density, granulate | polyethylene, high density, granulate | Cutoff, S - RER	0.0382063	kg CO2 eq (short)				0.0012	polyethylene production, high density, granulate | polyethylene, high density, granulate | Cutoff, S - RER	0.0382063	kg CO2 eq (short)				0.0009	polyethylene production, high density, granulate | polyethylene, high density, granulate | Cutoff, S - RER	0.0382063	kg CO2 eq (short)
	0.0359		Football Stadium: Construction of the Drainage Layer - NO	1.02157	kg CO2 eq (short)				0.0026	polypropylene production, granulate | polypropylene, granulate | Cutoff, S - RER	0.0379192	kg CO2 eq (short)				0.0012	polypropylene production, granulate | polypropylene, granulate | Cutoff, S - RER	0.0379192	kg CO2 eq (short)				0.0009	polypropylene production, granulate | polypropylene, granulate | Cutoff, S - RER	0.0379192	kg CO2 eq (short)
		0.0285	market for sand | sand | Cutoff, S - RoW	0.809954	kg CO2 eq (short)
		0.0074	diesel, burned in building machine | diesel, burned in building machine | Cutoff, S - GLO	0.21161	kg CO2 eq (short)
	0.016		Construction of natural gras	0.455533	kg CO2 eq (short)
		0.0064	diesel, burned in building machine | diesel, burned in building machine | Cutoff, S - GLO	0.181335	kg CO2 eq (short)
		0.0035	market for inorganic phosphorus fertiliser, as P2O5 | inorganic phosphorus fertiliser, as P2O5 | Cutoff, S - NO	0.0984747	kg CO2 eq (short)
		0.0015	market for inorganic nitrogen fertiliser, as N | inorganic nitrogen fertiliser, as N | Cutoff, S - NO	0.0426212	kg CO2 eq (short)
		0.0007	market for inorganic potassium fertiliser, as K2O | inorganic potassium fertiliser, as K2O | Cutoff, S - NO	0.0188953	kg CO2 eq (short)
		0.0006	market for grass seed, organic, for sowing | grass seed, organic, for sowing | Cutoff, S - GLO	0.0156735	kg CO2 eq (short)
		0.0005	irrigation, sprinkler | irrigation | Cutoff, S - DE	0.0134948	kg CO2 eq (short)

## Sheet: FossilandNuclearEnergyUse
Natural Gras							Wood-Based Infill							ELT - Base							EPDM - Base
Percentual Contribution			Process	Amount	Unit		Percentual Contribution			Process	Amount	Unit		Percentual Contribution			Process	Amount	Unit		Percentual Contribution			Process	Amount	Unit
1			Natural Gras - Benchmark	284.461	MJ deprived		1	0	0	GOE - Wood based infill	240.088	MJ deprived		1			Artificial Gras - ELT - Base Case	238.015	MJ deprived		1			Artificial Gras - EPDM - Base Case	623.319	MJ deprived
	0.413		Maintenance: Natural Gras	117.486	MJ deprived			0.4433		Construction of the base layer - Football Pitch - Artificial Turf	106.431	MJ deprived			0.4472		Construction of the base layer - Football Pitch - Artificial Turf	106.431	MJ deprived			0.6238		EPDM - Base Case	388.848	MJ deprived
		0.101	market for inorganic nitrogen fertiliser, as N | inorganic nitrogen fertiliser, as N | Cutoff, S - NO	28.7428	MJ deprived				0.1563	mastic asphalt production | mastic asphalt | Cutoff, S - RoW	84.5456	MJ deprived				0.3552	mastic asphalt production | mastic asphalt | Cutoff, S - RoW	84.5456	MJ deprived				0.6202	synthetic rubber production | synthetic rubber | Cutoff, S - RER	386.585	MJ deprived
		0.0968	diesel, burned in building machine | diesel, burned in building machine | Cutoff, S - GLO	27.5333	MJ deprived				0.0908	market for gravel, crushed | gravel, crushed | Cutoff, S - RoW	18.4178	MJ deprived				0.0774	market for gravel, crushed | gravel, crushed | Cutoff, S - RoW	18.4178	MJ deprived				0.0036	treatment of waste rubber, unspecified, municipal incineration | waste rubber, unspecified | Cutoff, S - Europe without Switzerland	2.26321	MJ deprived
		0.0601	market for inorganic potassium fertiliser, as K2O | inorganic potassium fertiliser, as K2O | Cutoff, S - NO	17.0859	MJ deprived				0.0113	diesel, burned in building machine | diesel, burned in building machine | Cutoff, S - GLO	2.29444	MJ deprived				0.0096	diesel, burned in building machine | diesel, burned in building machine | Cutoff, S - GLO	2.29444	MJ deprived			0.1707		Construction of the base layer - Football Pitch - Artificial Turf	106.431	MJ deprived
		0.0386	treatment of biowaste by anaerobic digestion | biowaste | Cutoff, S - RoW	10.9851	MJ deprived				0.0047	market for sand | sand | Cutoff, S - RoW	0.983967	MJ deprived				0.0041	market for sand | sand | Cutoff, S - RoW	0.983967	MJ deprived				0.1356	mastic asphalt production | mastic asphalt | Cutoff, S - RoW	84.5456	MJ deprived
		0.0343	market for irrigation | irrigation | Cutoff, S - DE	9.75079	MJ deprived				0.0016	concrete block production | concrete block | Cutoff, S - RoW	0.189195	MJ deprived				0.0008	concrete block production | concrete block | Cutoff, S - RoW	0.189195	MJ deprived				0.0295	market for gravel, crushed | gravel, crushed | Cutoff, S - RoW	18.4178	MJ deprived
		0.0224	market for grass seed, organic, for sowing | grass seed, organic, for sowing | Cutoff, S - GLO	6.38296	MJ deprived			0.2723	0	Renovation: Artificial Turf	65.3798	MJ deprived			0.2747		Renovation: Artificial Turf	65.3798	MJ deprived				0.0037	diesel, burned in building machine | diesel, burned in building machine | Cutoff, S - GLO	2.29444	MJ deprived
		0.0184	market for sand | sand | Cutoff, S - CH	5.22767	MJ deprived				0.1241	polypropylene production, granulate | polypropylene, granulate | Cutoff, S - RER	30.2362	MJ deprived				0.127	polypropylene production, granulate | polypropylene, granulate | Cutoff, S - RER	30.2362	MJ deprived				0.0016	market for sand | sand | Cutoff, S - RoW	0.983967	MJ deprived
		0.0157	market for inorganic phosphorus fertiliser, as P2O5 | inorganic phosphorus fertiliser, as P2O5 | Cutoff, S - NO	4.45283	MJ deprived				0.0515	polyethylene production, high density, granulate | polyethylene, high density, granulate | Cutoff, S - RER	29.7356	MJ deprived				0.1249	polyethylene production, high density, granulate | polyethylene, high density, granulate | Cutoff, S - RER	29.7356	MJ deprived				0.0003	concrete block production | concrete block | Cutoff, S - RoW	0.189195	MJ deprived
		0.0122	market for alkyd paint, white, without solvent, in 60% solution state | alkyd paint, white, without solvent, in 60% solution state | Cutoff, S - RER	3.46108	MJ deprived				0.0511	diesel, burned in building machine | diesel, burned in building machine | Cutoff, S - GLO	2.90773	MJ deprived				0.0122	diesel, burned in building machine | diesel, burned in building machine | Cutoff, S - GLO	2.90773	MJ deprived			0.1049		Renovation: Artificial Turf	65.3798	MJ deprived
		0.0102	Construction of natural gras	2.90861	MJ deprived				0.0143	silica sand production | silica sand | Cutoff, S - RoW	2.12185	MJ deprived				0.0089	silica sand production | silica sand | Cutoff, S - RoW	2.12185	MJ deprived				0.0485	polypropylene production, granulate | polypropylene, granulate | Cutoff, S - RER	30.2362	MJ deprived
		0.0022	market for pesticide, unspecified | pesticide, unspecified | Cutoff, S - GLO	0.635821	MJ deprived				0.0134	treatment of waste plastic, mixture, municipal incineration | waste plastic, mixture | Cutoff, S - RoW	0.378335	MJ deprived				0.0016	treatment of waste plastic, mixture, municipal incineration | waste plastic, mixture | Cutoff, S - RoW	0.378335	MJ deprived				0.0477	polyethylene production, high density, granulate | polyethylene, high density, granulate | Cutoff, S - RER	29.7356	MJ deprived
		0.0003	market for steel, low-alloyed, hot rolled | steel, low-alloyed, hot rolled | Cutoff, S - GLO	0.0862201	MJ deprived			0.0679		Football Stadium: Infrastructure, Lights, Fence and Mowing edges	16.2921	MJ deprived			0.0685		Football Stadium: Infrastructure, Lights, Fence and Mowing edges	16.2921	MJ deprived				0.0047	diesel, burned in building machine | diesel, burned in building machine | Cutoff, S - GLO	2.90773	MJ deprived
		0.0003	treatment of municipal solid waste, incineration | municipal solid waste | Cutoff, S - NO	0.0768877	MJ deprived				0.1015	market for concrete, normal strength | concrete, normal strength | Cutoff, S - AT	4.2719	MJ deprived				0.0179	market for concrete, normal strength | concrete, normal strength | Cutoff, S - AT	4.2719	MJ deprived				0.0034	silica sand production | silica sand | Cutoff, S - RoW	2.12185	MJ deprived
		0.0002	market for chlorothalonil | chlorothalonil | Cutoff, S - GLO	0.066432	MJ deprived				0.0498	market for polyethylene, high density, granulate | polyethylene, high density, granulate | Cutoff, S - GLO	2.24502	MJ deprived				0.0094	market for polyethylene, high density, granulate | polyethylene, high density, granulate | Cutoff, S - GLO	2.24502	MJ deprived				0.0006	treatment of waste plastic, mixture, municipal incineration | waste plastic, mixture | Cutoff, S - RoW	0.378335	MJ deprived
		0.0002	market for fosetyl-Al | fosetyl-Al | Cutoff, S - GLO	0.0663831	MJ deprived				0.0253	market for steel, low-alloyed | steel, low-alloyed | Cutoff, S - GLO	2.08806	MJ deprived				0.0088	market for steel, low-alloyed | steel, low-alloyed | Cutoff, S - GLO	2.08806	MJ deprived			0.0261		Football Stadium: Infrastructure, Lights, Fence and Mowing edges	16.2921	MJ deprived
		0	market for electricity, medium voltage | electricity, medium voltage | Cutoff, S - NO	0.0132884	MJ deprived					market for reinforcing steel | reinforcing steel | Cutoff, S - GLO	2.037	MJ deprived				0.0086	market for reinforcing steel | reinforcing steel | Cutoff, S - GLO	2.037	MJ deprived				0.0069	market for concrete, normal strength | concrete, normal strength | Cutoff, S - AT	4.2719	MJ deprived
		0	market for tap water | tap water | Cutoff, S - Europe without Switzerland	0.0101151	MJ deprived				0.0395	aluminium production, primary, ingot | aluminium, primary, ingot | Cutoff, S - IAI Area, EU27 & EFTA	1.60267	MJ deprived				0.0067	aluminium production, primary, ingot | aluminium, primary, ingot | Cutoff, S - IAI Area, EU27 & EFTA	1.60267	MJ deprived				0.0036	market for polyethylene, high density, granulate | polyethylene, high density, granulate | Cutoff, S - GLO	2.24502	MJ deprived
	0.1315		Demolition of a football pitch: Natural Gras	37.4113	MJ deprived				0.0128	market for polypropylene, granulate | polypropylene, granulate | Cutoff, S - GLO	1.14412	MJ deprived				0.0048	market for polypropylene, granulate | polypropylene, granulate | Cutoff, S - GLO	1.14412	MJ deprived				0.0033	market for steel, low-alloyed | steel, low-alloyed | Cutoff, S - GLO	2.08806	MJ deprived
		0.0637	treatment of inert waste, sanitary landfill | inert waste | Cutoff, S - Europe without Switzerland	18.1315	MJ deprived				0.0123	electronic component production, passive, unspecified | electronic component, passive, unspecified | Cutoff, S - GLO	1.1097	MJ deprived				0.0047	electronic component production, passive, unspecified | electronic component, passive, unspecified | Cutoff, S - GLO	1.1097	MJ deprived				0.0033	market for reinforcing steel | reinforcing steel | Cutoff, S - GLO	2.037	MJ deprived
		0.0477	market for waste concrete | waste concrete | Cutoff, S - Europe without Switzerland	13.5729	MJ deprived				0.0069	metal working, average for aluminium product manufacturing | metal working, average for aluminium product manufacturing | Cutoff, S - RER	0.629171	MJ deprived				0.0026	metal working, average for aluminium product manufacturing | metal working, average for aluminium product manufacturing | Cutoff, S - RER	0.629171	MJ deprived				0.0026	aluminium production, primary, ingot | aluminium, primary, ingot | Cutoff, S - IAI Area, EU27 & EFTA	1.60267	MJ deprived
		0.0167	diesel, burned in building machine | diesel, burned in building machine | Cutoff, S - GLO	4.76046	MJ deprived				0.0053	diesel, burned in building machine | diesel, burned in building machine | Cutoff, S - GLO	0.540375	MJ deprived				0.0023	diesel, burned in building machine | diesel, burned in building machine | Cutoff, S - GLO	0.540375	MJ deprived				0.0018	market for polypropylene, granulate | polypropylene, granulate | Cutoff, S - GLO	1.14412	MJ deprived
		0.0029	market for waste reinforced concrete | waste reinforced concrete | Cutoff, S - Europe without Switzerland	0.815754	MJ deprived				0.0045	concrete block production | concrete block | Cutoff, S - DE	0.374552	MJ deprived				0.0016	concrete block production | concrete block | Cutoff, S - DE	0.374552	MJ deprived				0.0018	electronic component production, passive, unspecified | electronic component, passive, unspecified | Cutoff, S - GLO	1.1097	MJ deprived
		0.0002	market for scrap steel | scrap steel | Cutoff, S - Europe without Switzerland	0.0583406	MJ deprived				0.0035	market for extrusion, plastic pipes | extrusion, plastic pipes | Cutoff, S - GLO	0.24955	MJ deprived				0.001	market for extrusion, plastic pipes | extrusion, plastic pipes | Cutoff, S - GLO	0.24955	MJ deprived				0.001	metal working, average for aluminium product manufacturing | metal working, average for aluminium product manufacturing | Cutoff, S - RER	0.629171	MJ deprived
		0.0001	market for waste polyethylene | waste polyethylene | Cutoff, S - NO	0.0374356	MJ deprived			0.0586	0.0032	Football Stadium: Construction of Groundworks - Artificial Turf - NO	14.071	MJ deprived			0.0591		Football Stadium: Construction of Groundworks - Artificial Turf - NO	14.071	MJ deprived				0.0009	diesel, burned in building machine | diesel, burned in building machine | Cutoff, S - GLO	0.540375	MJ deprived
		0.0001	market for waste polypropylene | waste polypropylene | Cutoff, S - NO	0.0348859	MJ deprived				0.0027	market for quicklime, milled, packed | quicklime, milled, packed | Cutoff, S - RER	6.5246	MJ deprived				0.0274	market for quicklime, milled, packed | quicklime, milled, packed | Cutoff, S - RER	6.5246	MJ deprived				0.0006	concrete block production | concrete block | Cutoff, S - DE	0.374552	MJ deprived
	0.1169		Construction of the base layer - Football Pitch - Natural Turf	33.2435	MJ deprived				0.0022	diesel, burned in building machine | diesel, burned in building machine | Cutoff, S - GLO	5.14642	MJ deprived				0.0216	diesel, burned in building machine | diesel, burned in building machine | Cutoff, S - GLO	5.14642	MJ deprived				0.0004	market for extrusion, plastic pipes | extrusion, plastic pipes | Cutoff, S - GLO	0.24955	MJ deprived
		0.105	market for silica sand | silica sand | Cutoff, S - GLO	29.8562	MJ deprived				0.0012	treatment of biowaste by anaerobic digestion | biowaste | Cutoff, S - RoW	2.39998	MJ deprived				0.0101	treatment of biowaste by anaerobic digestion | biowaste | Cutoff, S - RoW	2.39998	MJ deprived			0.0226		Football Stadium: Construction of Groundworks - Artificial Turf - NO	14.071	MJ deprived
		0.0109	diesel, burned in building machine | diesel, burned in building machine | Cutoff, S - GLO	3.11358	MJ deprived			0.056		Football Stadium: Consturction of Piping System - NO	13.4452	MJ deprived			0.0565		Football Stadium: Consturction of Piping System - NO	13.4452	MJ deprived				0.0105	market for quicklime, milled, packed | quicklime, milled, packed | Cutoff, S - RER	6.5246	MJ deprived
		0.001	limestone production, crushed, washed | limestone, crushed, washed | Cutoff, S - RoW	0.273794	MJ deprived				0.0365	market for gravel, round | gravel, round | Cutoff, S - RoW	4.39967	MJ deprived				0.0185	market for gravel, round | gravel, round | Cutoff, S - RoW	4.39967	MJ deprived				0.0083	diesel, burned in building machine | diesel, burned in building machine | Cutoff, S - GLO	5.14642	MJ deprived
	0.1145		Football Stadium: Infrastructure, Lights, Fence and Mowing edges	32.5842	MJ deprived				0.0232	diesel, burned in building machine | diesel, burned in building machine | Cutoff, S - GLO	3.21652	MJ deprived				0.0135	diesel, burned in building machine | diesel, burned in building machine | Cutoff, S - GLO	3.21652	MJ deprived				0.0039	treatment of biowaste by anaerobic digestion | biowaste | Cutoff, S - RoW	2.39998	MJ deprived
		0.03	market for concrete, normal strength | concrete, normal strength | Cutoff, S - AT	8.54379	MJ deprived				0.0117	market for polypropylene, granulate | polypropylene, granulate | Cutoff, S - GLO	2.7459	MJ deprived				0.0115	market for polypropylene, granulate | polypropylene, granulate | Cutoff, S - GLO	2.7459	MJ deprived			0.0216		Football Stadium: Consturction of Piping System - NO	13.4452	MJ deprived
		0.0158	market for polyethylene, high density, granulate | polyethylene, high density, granulate | Cutoff, S - GLO	4.49004	MJ deprived				0.0063	market for polyethylene, high density, granulate | polyethylene, high density, granulate | Cutoff, S - GLO	2.69402	MJ deprived				0.0113	market for polyethylene, high density, granulate | polyethylene, high density, granulate | Cutoff, S - GLO	2.69402	MJ deprived				0.0071	market for gravel, round | gravel, round | Cutoff, S - RoW	4.39967	MJ deprived
		0.0147	market for steel, low-alloyed | steel, low-alloyed | Cutoff, S - GLO	4.17612	MJ deprived				0.0034	extrusion, plastic pipes | extrusion, plastic pipes | Cutoff, S - RER	0.360094	MJ deprived				0.0015	extrusion, plastic pipes | extrusion, plastic pipes | Cutoff, S - RER	0.360094	MJ deprived				0.0052	diesel, burned in building machine | diesel, burned in building machine | Cutoff, S - GLO	3.21652	MJ deprived
		0.0143	market for reinforcing steel | reinforcing steel | Cutoff, S - GLO	4.07399	MJ deprived				0.0016	market for concrete, normal strength | concrete, normal strength | Cutoff, S - RoW	0.0290457	MJ deprived				0.0001	market for concrete, normal strength | concrete, normal strength | Cutoff, S - RoW	0.0290457	MJ deprived				0.0044	market for polypropylene, granulate | polypropylene, granulate | Cutoff, S - GLO	2.7459	MJ deprived
		0.0113	aluminium production, primary, ingot | aluminium, primary, ingot | Cutoff, S - IAI Area, EU27 & EFTA	3.20534	MJ deprived			0.0371	0.0001	Demolition of a football pitch: Artificial Gras	8.90585	MJ deprived			0.0374		Demolition of a football pitch: Artificial Gras	8.90585	MJ deprived				0.0043	market for polyethylene, high density, granulate | polyethylene, high density, granulate | Cutoff, S - GLO	2.69402	MJ deprived
		0.008	market for polypropylene, granulate | polypropylene, granulate | Cutoff, S - GLO	2.28825	MJ deprived					treatment of waste asphalt, sanitary landfill | waste asphalt | Cutoff, S - RoW	4.83552	MJ deprived				0.0203	treatment of waste asphalt, sanitary landfill | waste asphalt | Cutoff, S - RoW	4.83552	MJ deprived				0.0006	extrusion, plastic pipes | extrusion, plastic pipes | Cutoff, S - RER	0.360094	MJ deprived
		0.0078	electronic component production, passive, unspecified | electronic component, passive, unspecified | Cutoff, S - GLO	2.21941	MJ deprived				0.0212	diesel, burned in building machine | diesel, burned in building machine | Cutoff, S - GLO	2.38023	MJ deprived				0.01	diesel, burned in building machine | diesel, burned in building machine | Cutoff, S - GLO	2.38023	MJ deprived				0	market for concrete, normal strength | concrete, normal strength | Cutoff, S - RoW	0.0290457	MJ deprived
		0.0044	metal working, average for aluminium product manufacturing | metal working, average for aluminium product manufacturing | Cutoff, S - RER	1.25834	MJ deprived				0.0158	market for waste concrete | waste concrete | Cutoff, S - Europe without Switzerland	1.11562	MJ deprived				0.0047	market for waste concrete | waste concrete | Cutoff, S - Europe without Switzerland	1.11562	MJ deprived			0.0143		Demolition of a football pitch: Artificial Gras	8.90585	MJ deprived
		0.0038	diesel, burned in building machine | diesel, burned in building machine | Cutoff, S - GLO	1.08075	MJ deprived				0.0054	market for waste reinforced concrete | waste reinforced concrete | Cutoff, S - Europe without Switzerland	0.407877	MJ deprived				0.0017	market for waste reinforced concrete | waste reinforced concrete | Cutoff, S - Europe without Switzerland	0.407877	MJ deprived				0.0078	treatment of waste asphalt, sanitary landfill | waste asphalt | Cutoff, S - RoW	4.83552	MJ deprived
		0.0026	concrete block production | concrete block | Cutoff, S - DE	0.749104	MJ deprived				0.0054	market for waste polypropylene | waste polypropylene | Cutoff, S - NO	0.118709	MJ deprived				0.0005	market for waste polypropylene | waste polypropylene | Cutoff, S - NO	0.118709	MJ deprived				0.0038	diesel, burned in building machine | diesel, burned in building machine | Cutoff, S - GLO	2.38023	MJ deprived
		0.0018	market for extrusion, plastic pipes | extrusion, plastic pipes | Cutoff, S - GLO	0.4991	MJ deprived				0.0012	market for scrap steel | scrap steel | Cutoff, S - Europe without Switzerland	0.0291703	MJ deprived				0.0001	market for scrap steel | scrap steel | Cutoff, S - Europe without Switzerland	0.0291703	MJ deprived				0.0018	market for waste concrete | waste concrete | Cutoff, S - Europe without Switzerland	1.11562	MJ deprived
	0.0945		Football Stadium: Consturction of Piping System - NO	26.8905	MJ deprived				0.0003	market for waste polyethylene | waste polyethylene | Cutoff, S - NO	0.0187178	MJ deprived				0.0001	market for waste polyethylene | waste polyethylene | Cutoff, S - NO	0.0187178	MJ deprived				0.0007	market for waste reinforced concrete | waste reinforced concrete | Cutoff, S - Europe without Switzerland	0.407877	MJ deprived
		0.0309	market for gravel, round | gravel, round | Cutoff, S - RoW	8.79933	MJ deprived			0.0234		GoE - Wood-Based Infill	5.61581	MJ deprived			0.021		Construction of Artificial Gras	5.00554	MJ deprived				0.0002	market for waste polypropylene | waste polypropylene | Cutoff, S - NO	0.118709	MJ deprived
		0.0226	diesel, burned in building machine | diesel, burned in building machine | Cutoff, S - GLO	6.43304	MJ deprived				0.0265	Birch wood infill	5.00892	MJ deprived				0.0064	polypropylene production, granulate | polypropylene, granulate | Cutoff, S - RER	1.51181	MJ deprived				0	market for scrap steel | scrap steel | Cutoff, S - Europe without Switzerland	0.0291703	MJ deprived
		0.0193	market for polypropylene, granulate | polypropylene, granulate | Cutoff, S - GLO	5.49179	MJ deprived				0.0044	treatment of waste wood, untreated, municipal incineration | waste wood, untreated | Cutoff, S - RoW	0.60689	MJ deprived				0.0062	polyethylene production, high density, granulate | polyethylene, high density, granulate | Cutoff, S - RER	1.48679	MJ deprived				0	market for waste polyethylene | waste polyethylene | Cutoff, S - NO	0.0187178	MJ deprived
		0.0189	market for polyethylene, high density, granulate | polyethylene, high density, granulate | Cutoff, S - GLO	5.38804	MJ deprived			0.0208		Construction of Artificial Gras	5.00554	MJ deprived				0.0058	market for silica sand | silica sand | Cutoff, S - GLO	1.38508	MJ deprived			0.008		Construction of Artificial Gras	5.00554	MJ deprived
		0.0025	extrusion, plastic pipes | extrusion, plastic pipes | Cutoff, S - RER	0.720187	MJ deprived				0.0161	polypropylene production, granulate | polypropylene, granulate | Cutoff, S - RER	1.51181	MJ deprived				0.0026	diesel, burned in building machine | diesel, burned in building machine | Cutoff, S - GLO	0.621858	MJ deprived				0.0024	polypropylene production, granulate | polypropylene, granulate | Cutoff, S - RER	1.51181	MJ deprived
		0.0002	market for concrete, normal strength | concrete, normal strength | Cutoff, S - RoW	0.0580914	MJ deprived				0.007	polyethylene production, high density, granulate | polyethylene, high density, granulate | Cutoff, S - RER	1.48679	MJ deprived			0.0208		Maintenance: Artificial Gras	4.94023	MJ deprived				0.0024	polyethylene production, high density, granulate | polyethylene, high density, granulate | Cutoff, S - RER	1.48679	MJ deprived
	0.0503		Football Stadium: Construction of the Drainage Layer - NO	14.298	MJ deprived				0.007	market for silica sand | silica sand | Cutoff, S - GLO	1.38508	MJ deprived				0.0138	diesel, burned in building machine | diesel, burned in building machine | Cutoff, S - GLO	3.28083	MJ deprived				0.0022	market for silica sand | silica sand | Cutoff, S - GLO	1.38508	MJ deprived
		0.04	market for sand | sand | Cutoff, S - RoW	11.3903	MJ deprived				0.0006	diesel, burned in building machine | diesel, burned in building machine | Cutoff, S - GLO	0.621858	MJ deprived				0.0065	market for irrigation | irrigation | Cutoff, S - DE	1.55465	MJ deprived				0.001	diesel, burned in building machine | diesel, burned in building machine | Cutoff, S - GLO	0.621858	MJ deprived
		0.0102	diesel, burned in building machine | diesel, burned in building machine | Cutoff, S - GLO	2.90772	MJ deprived			0.0206	0	Maintenance: Artificial Gras	4.94023	MJ deprived				0.0003	treatment of municipal solid waste, incineration | municipal solid waste | Cutoff, S - NO	0.0718293	MJ deprived			0.0079		Maintenance: Artificial Gras	4.94023	MJ deprived
	0.0442		Football Stadium: Construction of Groundworks - Natural Turf - NO	12.5625	MJ deprived				0	diesel, burned in building machine | diesel, burned in building machine | Cutoff, S - GLO	3.28083	MJ deprived				0.0001	treatment of biowaste by anaerobic digestion | biowaste | Cutoff, S - RoW	0.0277713	MJ deprived				0.0053	diesel, burned in building machine | diesel, burned in building machine | Cutoff, S - GLO	3.28083	MJ deprived
		0.0273	diesel, burned in building machine | diesel, burned in building machine | Cutoff, S - GLO	7.7625	MJ deprived				0.0082	market for irrigation | irrigation | Cutoff, S - DE	1.55465	MJ deprived				0	market for electricity, medium voltage | electricity, medium voltage | Cutoff, S - NO	0.0051235	MJ deprived				0.0025	market for irrigation | irrigation | Cutoff, S - DE	1.55465	MJ deprived
		0.0169	treatment of biowaste by anaerobic digestion | biowaste | Cutoff, S - RoW	4.79996	MJ deprived				0.0031	treatment of municipal solid waste, incineration | municipal solid waste | Cutoff, S - NO	0.0718293	MJ deprived			0.0149		ELT - Base Case	3.54375	MJ deprived				0.0001	treatment of municipal solid waste, incineration | municipal solid waste | Cutoff, S - NO	0.0718293	MJ deprived
	0.0183		Construction of natural gras	5.21258	MJ deprived				0.0026	treatment of biowaste by anaerobic digestion | biowaste | Cutoff, S - RoW	0.0277713	MJ deprived				0.01	treatment of waste rubber, unspecified, municipal incineration | waste rubber, unspecified | Cutoff, S - Europe without Switzerland	2.3701	MJ deprived				0	treatment of biowaste by anaerobic digestion | biowaste | Cutoff, S - RoW	0.0277713	MJ deprived
		0.0088	diesel, burned in building machine | diesel, burned in building machine | Cutoff, S - GLO	2.49173	MJ deprived				0.0026	market for electricity, medium voltage | electricity, medium voltage | Cutoff, S - NO	0.0051235	MJ deprived				0.0049	Production of ELT	1.17366	MJ deprived				0	market for electricity, medium voltage | electricity, medium voltage | Cutoff, S - NO	0.0051235	MJ deprived
		0.0052	market for inorganic phosphorus fertiliser, as P2O5 | inorganic phosphorus fertiliser, as P2O5 | Cutoff, S - NO	1.48427	MJ deprived
		0.0022	market for inorganic nitrogen fertiliser, as N | inorganic nitrogen fertiliser, as N | Cutoff, S - NO	0.638729	MJ deprived
		0.001	market for inorganic potassium fertiliser, as K2O | inorganic potassium fertiliser, as K2O | Cutoff, S - NO	0.284764	MJ deprived
		0.0007	irrigation, sprinkler | irrigation | Cutoff, S - DE	0.200818	MJ deprived
		0.0004	market for grass seed, organic, for sowing | grass seed, organic, for sowing | Cutoff, S - GLO	0.112261	MJ deprived
	0.0168		Renovation: Natural Turf	4.77267	MJ deprived
		0.0106	treatment of biowaste by anaerobic digestion | biowaste | Cutoff, S - RoW	3.00341	MJ deprived
		0.0044	diesel, burned in building machine | diesel, burned in building machine | Cutoff, S - GLO	1.24801	MJ deprived
		0.0018	Construction of natural gras	0.521258	MJ deprived

## Sheet: FreshwaterAcidification
Natural Gras							Wood-Based Infill							ELT - Base							EPDM - Base
Percentual Contribution			Process	Amount	Unit		Percentual Contribution			Process	Amount	Unit		Percentual Contribution			Process	Amount	Unit		Percentual Contribution			Process	Amount	Unit
1			Natural Gras - Benchmark	3.41273e-12	kg SO2 eq		1			GOE - Wood based infill	3.10035e-13	kg SO2 eq		1			Artificial Gras - ELT - Base Case	3.08256e-13	kg SO2 eq		1			Artificial Gras - EPDM - Base Case	6.04635e-13	kg SO2 eq
	0.8696		Maintenance: Natural Gras	2.96758e-12	kg SO2 eq			0.4057		Construction of the base layer - Football Pitch - Artificial Turf	1.25796e-13	kg SO2 eq			0.4081		Construction of the base layer - Football Pitch - Artificial Turf	1.25796e-13	kg SO2 eq			0.5125		EPDM - Base Case	3.09846e-13	kg SO2 eq
		0.0245	market for grass seed, organic, for sowing | grass seed, organic, for sowing | Cutoff, S - GLO	8.34637e-14	kg SO2 eq				0.2427	mastic asphalt production | mastic asphalt | Cutoff, S - RoW	7.52583e-14	kg SO2 eq				0.2441	mastic asphalt production | mastic asphalt | Cutoff, S - RoW	7.52583e-14	kg SO2 eq				0.4965	synthetic rubber production | synthetic rubber | Cutoff, S - RER	3.00173e-13	kg SO2 eq
		0.0238	diesel, burned in building machine | diesel, burned in building machine | Cutoff, S - GLO	8.11804e-14	kg SO2 eq				0.1323	market for gravel, crushed | gravel, crushed | Cutoff, S - RoW	4.10144e-14	kg SO2 eq				0.1331	market for gravel, crushed | gravel, crushed | Cutoff, S - RoW	4.10144e-14	kg SO2 eq				0.016	treatment of waste rubber, unspecified, municipal incineration | waste rubber, unspecified | Cutoff, S - Europe without Switzerland	9.67242e-15	kg SO2 eq
		0.0118	market for inorganic nitrogen fertiliser, as N | inorganic nitrogen fertiliser, as N | Cutoff, S - NO	4.04343e-14	kg SO2 eq				0.0218	diesel, burned in building machine | diesel, burned in building machine | Cutoff, S - GLO	6.76502e-15	kg SO2 eq				0.0219	diesel, burned in building machine | diesel, burned in building machine | Cutoff, S - GLO	6.76502e-15	kg SO2 eq			0.2081		Construction of the base layer - Football Pitch - Artificial Turf	1.25796e-13	kg SO2 eq
		0.0113	Construction of natural gras	3.85988e-14	kg SO2 eq				0.0074	market for sand | sand | Cutoff, S - RoW	2.294e-15	kg SO2 eq				0.0074	market for sand | sand | Cutoff, S - RoW	2.294e-15	kg SO2 eq				0.1245	mastic asphalt production | mastic asphalt | Cutoff, S - RoW	7.52583e-14	kg SO2 eq
		0.0089	treatment of biowaste by anaerobic digestion | biowaste | Cutoff, S - RoW	3.04009e-14	kg SO2 eq				0.0015	concrete block production | concrete block | Cutoff, S - RoW	4.63985e-16	kg SO2 eq				0.0015	concrete block production | concrete block | Cutoff, S - RoW	4.63985e-16	kg SO2 eq				0.0678	market for gravel, crushed | gravel, crushed | Cutoff, S - RoW	4.10144e-14	kg SO2 eq
		0.0072	market for inorganic potassium fertiliser, as K2O | inorganic potassium fertiliser, as K2O | Cutoff, S - NO	2.45293e-14	kg SO2 eq			0.151		Renovation: Artificial Turf	4.68013e-14	kg SO2 eq			0.1518		Renovation: Artificial Turf	4.68013e-14	kg SO2 eq				0.0112	diesel, burned in building machine | diesel, burned in building machine | Cutoff, S - GLO	6.76502e-15	kg SO2 eq
		0.0068	market for alkyd paint, white, without solvent, in 60% solution state | alkyd paint, white, without solvent, in 60% solution state | Cutoff, S - RER	2.31905e-14	kg SO2 eq				0.046	polyethylene production, high density, granulate | polyethylene, high density, granulate | Cutoff, S - RER	1.42472e-14	kg SO2 eq				0.0462	polyethylene production, high density, granulate | polyethylene, high density, granulate | Cutoff, S - RER	1.42472e-14	kg SO2 eq				0.0038	market for sand | sand | Cutoff, S - RoW	2.294e-15	kg SO2 eq
		0.0042	market for irrigation | irrigation | Cutoff, S - DE	1.43208e-14	kg SO2 eq				0.0449	polypropylene production, granulate | polypropylene, granulate | Cutoff, S - RER	1.39352e-14	kg SO2 eq				0.0452	polypropylene production, granulate | polypropylene, granulate | Cutoff, S - RER	1.39352e-14	kg SO2 eq				0.0008	concrete block production | concrete block | Cutoff, S - RoW	4.63985e-16	kg SO2 eq
		0.0027	market for sand | sand | Cutoff, S - CH	9.34979e-15	kg SO2 eq				0.0277	diesel, burned in building machine | diesel, burned in building machine | Cutoff, S - GLO	8.57325e-15	kg SO2 eq				0.0278	diesel, burned in building machine | diesel, burned in building machine | Cutoff, S - GLO	8.57325e-15	kg SO2 eq			0.0774		Renovation: Artificial Turf	4.68013e-14	kg SO2 eq
		0.002	market for inorganic phosphorus fertiliser, as P2O5 | inorganic phosphorus fertiliser, as P2O5 | Cutoff, S - NO	6.67742e-15	kg SO2 eq				0.0264	silica sand production | silica sand | Cutoff, S - RoW	8.17365e-15	kg SO2 eq				0.0265	silica sand production | silica sand | Cutoff, S - RoW	8.17365e-15	kg SO2 eq				0.0236	polyethylene production, high density, granulate | polyethylene, high density, granulate | Cutoff, S - RER	1.42472e-14	kg SO2 eq
		0.0007	market for pesticide, unspecified | pesticide, unspecified | Cutoff, S - GLO	2.38882e-15	kg SO2 eq				0.006	treatment of waste plastic, mixture, municipal incineration | waste plastic, mixture | Cutoff, S - RoW	1.87198e-15	kg SO2 eq				0.0061	treatment of waste plastic, mixture, municipal incineration | waste plastic, mixture | Cutoff, S - RoW	1.87198e-15	kg SO2 eq				0.023	polypropylene production, granulate | polypropylene, granulate | Cutoff, S - RER	1.39352e-14	kg SO2 eq
		0.0001	treatment of municipal solid waste, incineration | municipal solid waste | Cutoff, S - NO	2.87662e-16	kg SO2 eq			0.1041		Football Stadium: Infrastructure, Lights, Fence and Mowing edges	3.22688e-14	kg SO2 eq			0.1047		Football Stadium: Infrastructure, Lights, Fence and Mowing edges	3.22688e-14	kg SO2 eq				0.0142	diesel, burned in building machine | diesel, burned in building machine | Cutoff, S - GLO	8.57325e-15	kg SO2 eq
		0.0001	market for steel, low-alloyed, hot rolled | steel, low-alloyed, hot rolled | Cutoff, S - GLO	1.7198e-16	kg SO2 eq				0.0294	market for concrete, normal strength | concrete, normal strength | Cutoff, S - AT	9.10196e-15	kg SO2 eq				0.0295	market for concrete, normal strength | concrete, normal strength | Cutoff, S - AT	9.10196e-15	kg SO2 eq				0.0135	silica sand production | silica sand | Cutoff, S - RoW	8.17365e-15	kg SO2 eq
		0	market for fosetyl-Al | fosetyl-Al | Cutoff, S - GLO	1.60664e-16	kg SO2 eq				0.0148	electronic component production, passive, unspecified | electronic component, passive, unspecified | Cutoff, S - GLO	4.60071e-15	kg SO2 eq				0.0149	electronic component production, passive, unspecified | electronic component, passive, unspecified | Cutoff, S - GLO	4.60071e-15	kg SO2 eq				0.0031	treatment of waste plastic, mixture, municipal incineration | waste plastic, mixture | Cutoff, S - RoW	1.87198e-15	kg SO2 eq
		0	market for chlorothalonil | chlorothalonil | Cutoff, S - GLO	8.86571e-17	kg SO2 eq				0.0141	market for steel, low-alloyed | steel, low-alloyed | Cutoff, S - GLO	4.38242e-15	kg SO2 eq				0.0142	market for steel, low-alloyed | steel, low-alloyed | Cutoff, S - GLO	4.38242e-15	kg SO2 eq			0.0534		Football Stadium: Infrastructure, Lights, Fence and Mowing edges	3.22688e-14	kg SO2 eq
		0	market for tap water | tap water | Cutoff, S - Europe without Switzerland	1.59205e-17	kg SO2 eq				0.0125	market for reinforcing steel | reinforcing steel | Cutoff, S - GLO	3.86698e-15	kg SO2 eq				0.0125	market for reinforcing steel | reinforcing steel | Cutoff, S - GLO	3.86698e-15	kg SO2 eq				0.0151	market for concrete, normal strength | concrete, normal strength | Cutoff, S - AT	9.10196e-15	kg SO2 eq
		0	market for electricity, medium voltage | electricity, medium voltage | Cutoff, S - NO	1.2602e-17	kg SO2 eq				0.0114	aluminium production, primary, ingot | aluminium, primary, ingot | Cutoff, S - IAI Area, EU27 & EFTA	3.52508e-15	kg SO2 eq				0.0114	aluminium production, primary, ingot | aluminium, primary, ingot | Cutoff, S - IAI Area, EU27 & EFTA	3.52508e-15	kg SO2 eq				0.0076	electronic component production, passive, unspecified | electronic component, passive, unspecified | Cutoff, S - GLO	4.60071e-15	kg SO2 eq
	0.033		Construction of the base layer - Football Pitch - Natural Turf	1.12786e-13	kg SO2 eq				0.0052	metal working, average for aluminium product manufacturing | metal working, average for aluminium product manufacturing | Cutoff, S - RER	1.62177e-15	kg SO2 eq				0.0053	metal working, average for aluminium product manufacturing | metal working, average for aluminium product manufacturing | Cutoff, S - RER	1.62177e-15	kg SO2 eq				0.0072	market for steel, low-alloyed | steel, low-alloyed | Cutoff, S - GLO	4.38242e-15	kg SO2 eq
		0.0299	market for silica sand | silica sand | Cutoff, S - GLO	1.02081e-13	kg SO2 eq				0.0051	diesel, burned in building machine | diesel, burned in building machine | Cutoff, S - GLO	1.59326e-15	kg SO2 eq				0.0052	diesel, burned in building machine | diesel, burned in building machine | Cutoff, S - GLO	1.59326e-15	kg SO2 eq				0.0064	market for reinforcing steel | reinforcing steel | Cutoff, S - GLO	3.86698e-15	kg SO2 eq
		0.0027	diesel, burned in building machine | diesel, burned in building machine | Cutoff, S - GLO	9.18021e-15	kg SO2 eq				0.0046	market for polyethylene, high density, granulate | polyethylene, high density, granulate | Cutoff, S - GLO	1.43431e-15	kg SO2 eq				0.0047	market for polyethylene, high density, granulate | polyethylene, high density, granulate | Cutoff, S - GLO	1.43431e-15	kg SO2 eq				0.0058	aluminium production, primary, ingot | aluminium, primary, ingot | Cutoff, S - IAI Area, EU27 & EFTA	3.52508e-15	kg SO2 eq
		0.0004	limestone production, crushed, washed | limestone, crushed, washed | Cutoff, S - RoW	1.52435e-15	kg SO2 eq				0.003	concrete block production | concrete block | Cutoff, S - DE	9.2096e-16	kg SO2 eq				0.003	concrete block production | concrete block | Cutoff, S - DE	9.2096e-16	kg SO2 eq				0.0027	metal working, average for aluminium product manufacturing | metal working, average for aluminium product manufacturing | Cutoff, S - RER	1.62177e-15	kg SO2 eq
	0.0203		Construction of natural gras	6.91738e-14	kg SO2 eq				0.0023	market for polypropylene, granulate | polypropylene, granulate | Cutoff, S - GLO	7.08337e-16	kg SO2 eq				0.0023	market for polypropylene, granulate | polypropylene, granulate | Cutoff, S - GLO	7.08337e-16	kg SO2 eq				0.0026	diesel, burned in building machine | diesel, burned in building machine | Cutoff, S - GLO	1.59326e-15	kg SO2 eq
		0.0022	diesel, burned in building machine | diesel, burned in building machine | Cutoff, S - GLO	7.34671e-15	kg SO2 eq				0.0017	market for extrusion, plastic pipes | extrusion, plastic pipes | Cutoff, S - GLO	5.12923e-16	kg SO2 eq				0.0017	market for extrusion, plastic pipes | extrusion, plastic pipes | Cutoff, S - GLO	5.12923e-16	kg SO2 eq				0.0024	market for polyethylene, high density, granulate | polyethylene, high density, granulate | Cutoff, S - GLO	1.43431e-15	kg SO2 eq
		0.0007	market for inorganic phosphorus fertiliser, as P2O5 | inorganic phosphorus fertiliser, as P2O5 | Cutoff, S - NO	2.2258e-15	kg SO2 eq			0.0927		Football Stadium: Construction of Groundworks - Artificial Turf - NO	2.87521e-14	kg SO2 eq			0.0933		Football Stadium: Construction of Groundworks - Artificial Turf - NO	2.87521e-14	kg SO2 eq				0.0015	concrete block production | concrete block | Cutoff, S - DE	9.2096e-16	kg SO2 eq
		0.0004	market for grass seed, organic, for sowing | grass seed, organic, for sowing | Cutoff, S - GLO	1.46793e-15	kg SO2 eq				0.0489	diesel, burned in building machine | diesel, burned in building machine | Cutoff, S - GLO	1.51739e-14	kg SO2 eq				0.0492	diesel, burned in building machine | diesel, burned in building machine | Cutoff, S - GLO	1.51739e-14	kg SO2 eq				0.0012	market for polypropylene, granulate | polypropylene, granulate | Cutoff, S - GLO	7.08337e-16	kg SO2 eq
		0.0003	market for inorganic nitrogen fertiliser, as N | inorganic nitrogen fertiliser, as N | Cutoff, S - NO	8.98542e-16	kg SO2 eq				0.0224	market for quicklime, milled, packed | quicklime, milled, packed | Cutoff, S - RER	6.93625e-15	kg SO2 eq				0.0225	market for quicklime, milled, packed | quicklime, milled, packed | Cutoff, S - RER	6.93625e-15	kg SO2 eq				0.0008	market for extrusion, plastic pipes | extrusion, plastic pipes | Cutoff, S - GLO	5.12923e-16	kg SO2 eq
		0.0001	market for inorganic potassium fertiliser, as K2O | inorganic potassium fertiliser, as K2O | Cutoff, S - NO	4.08822e-16	kg SO2 eq				0.0214	treatment of biowaste by anaerobic digestion | biowaste | Cutoff, S - RoW	6.6419e-15	kg SO2 eq				0.0215	treatment of biowaste by anaerobic digestion | biowaste | Cutoff, S - RoW	6.6419e-15	kg SO2 eq			0.0476		Football Stadium: Construction of Groundworks - Artificial Turf - NO	2.87521e-14	kg SO2 eq
		0.0001	irrigation, sprinkler | irrigation | Cutoff, S - DE	2.97322e-16	kg SO2 eq			0.0759		Football Stadium: Consturction of Piping System - NO	2.35258e-14	kg SO2 eq			0.0763		Football Stadium: Consturction of Piping System - NO	2.35258e-14	kg SO2 eq				0.0251	diesel, burned in building machine | diesel, burned in building machine | Cutoff, S - GLO	1.51739e-14	kg SO2 eq
	0.0189		Football Stadium: Infrastructure, Lights, Fence and Mowing edges	6.45375e-14	kg SO2 eq				0.0324	market for gravel, round | gravel, round | Cutoff, S - RoW	1.00417e-14	kg SO2 eq				0.0326	market for gravel, round | gravel, round | Cutoff, S - RoW	1.00417e-14	kg SO2 eq				0.0115	market for quicklime, milled, packed | quicklime, milled, packed | Cutoff, S - RER	6.93625e-15	kg SO2 eq
		0.0053	market for concrete, normal strength | concrete, normal strength | Cutoff, S - AT	1.82039e-14	kg SO2 eq				0.0306	diesel, burned in building machine | diesel, burned in building machine | Cutoff, S - GLO	9.48369e-15	kg SO2 eq				0.0308	diesel, burned in building machine | diesel, burned in building machine | Cutoff, S - GLO	9.48369e-15	kg SO2 eq				0.011	treatment of biowaste by anaerobic digestion | biowaste | Cutoff, S - RoW	6.6419e-15	kg SO2 eq
		0.0027	electronic component production, passive, unspecified | electronic component, passive, unspecified | Cutoff, S - GLO	9.20142e-15	kg SO2 eq				0.0056	market for polyethylene, high density, granulate | polyethylene, high density, granulate | Cutoff, S - GLO	1.72117e-15	kg SO2 eq				0.0056	market for polyethylene, high density, granulate | polyethylene, high density, granulate | Cutoff, S - GLO	1.72117e-15	kg SO2 eq			0.0389		Football Stadium: Consturction of Piping System - NO	2.35258e-14	kg SO2 eq
		0.0026	market for steel, low-alloyed | steel, low-alloyed | Cutoff, S - GLO	8.76483e-15	kg SO2 eq				0.0055	market for polypropylene, granulate | polypropylene, granulate | Cutoff, S - GLO	1.70001e-15	kg SO2 eq				0.0055	market for polypropylene, granulate | polypropylene, granulate | Cutoff, S - GLO	1.70001e-15	kg SO2 eq				0.0166	market for gravel, round | gravel, round | Cutoff, S - RoW	1.00417e-14	kg SO2 eq
		0.0023	market for reinforcing steel | reinforcing steel | Cutoff, S - GLO	7.73396e-15	kg SO2 eq				0.0016	extrusion, plastic pipes | extrusion, plastic pipes | Cutoff, S - RER	5.09575e-16	kg SO2 eq				0.0017	extrusion, plastic pipes | extrusion, plastic pipes | Cutoff, S - RER	5.09575e-16	kg SO2 eq				0.0157	diesel, burned in building machine | diesel, burned in building machine | Cutoff, S - GLO	9.48369e-15	kg SO2 eq
		0.0021	aluminium production, primary, ingot | aluminium, primary, ingot | Cutoff, S - IAI Area, EU27 & EFTA	7.05017e-15	kg SO2 eq				0.0002	market for concrete, normal strength | concrete, normal strength | Cutoff, S - RoW	6.96485e-17	kg SO2 eq				0.0002	market for concrete, normal strength | concrete, normal strength | Cutoff, S - RoW	6.96485e-17	kg SO2 eq				0.0028	market for polyethylene, high density, granulate | polyethylene, high density, granulate | Cutoff, S - GLO	1.72117e-15	kg SO2 eq
		0.001	metal working, average for aluminium product manufacturing | metal working, average for aluminium product manufacturing | Cutoff, S - RER	3.24354e-15	kg SO2 eq			0.056		Demolition of a football pitch: Artificial Gras	1.73609e-14	kg SO2 eq			0.0563		Demolition of a football pitch: Artificial Gras	1.73609e-14	kg SO2 eq				0.0028	market for polypropylene, granulate | polypropylene, granulate | Cutoff, S - GLO	1.70001e-15	kg SO2 eq
		0.0009	diesel, burned in building machine | diesel, burned in building machine | Cutoff, S - GLO	3.18652e-15	kg SO2 eq				0.0241	treatment of waste asphalt, sanitary landfill | waste asphalt | Cutoff, S - RoW	7.47804e-15	kg SO2 eq				0.0243	treatment of waste asphalt, sanitary landfill | waste asphalt | Cutoff, S - RoW	7.47804e-15	kg SO2 eq				0.0008	extrusion, plastic pipes | extrusion, plastic pipes | Cutoff, S - RER	5.09575e-16	kg SO2 eq
		0.0008	market for polyethylene, high density, granulate | polyethylene, high density, granulate | Cutoff, S - GLO	2.86862e-15	kg SO2 eq				0.0226	diesel, burned in building machine | diesel, burned in building machine | Cutoff, S - GLO	7.01794e-15	kg SO2 eq				0.0228	diesel, burned in building machine | diesel, burned in building machine | Cutoff, S - GLO	7.01794e-15	kg SO2 eq				0.0001	market for concrete, normal strength | concrete, normal strength | Cutoff, S - RoW	6.96485e-17	kg SO2 eq
		0.0005	concrete block production | concrete block | Cutoff, S - DE	1.84192e-15	kg SO2 eq				0.005	market for waste concrete | waste concrete | Cutoff, S - Europe without Switzerland	1.55431e-15	kg SO2 eq				0.005	market for waste concrete | waste concrete | Cutoff, S - Europe without Switzerland	1.55431e-15	kg SO2 eq			0.0287		Demolition of a football pitch: Artificial Gras	1.73609e-14	kg SO2 eq
		0.0004	market for polypropylene, granulate | polypropylene, granulate | Cutoff, S - GLO	1.41667e-15	kg SO2 eq				0.0026	market for waste reinforced concrete | waste reinforced concrete | Cutoff, S - Europe without Switzerland	8.09435e-16	kg SO2 eq				0.0026	market for waste reinforced concrete | waste reinforced concrete | Cutoff, S - Europe without Switzerland	8.09435e-16	kg SO2 eq				0.0124	treatment of waste asphalt, sanitary landfill | waste asphalt | Cutoff, S - RoW	7.47804e-15	kg SO2 eq
		0.0003	market for extrusion, plastic pipes | extrusion, plastic pipes | Cutoff, S - GLO	1.02585e-15	kg SO2 eq				0.0013	market for waste polypropylene | waste polypropylene | Cutoff, S - NO	3.94719e-16	kg SO2 eq				0.0013	market for waste polypropylene | waste polypropylene | Cutoff, S - NO	3.94719e-16	kg SO2 eq				0.0116	diesel, burned in building machine | diesel, burned in building machine | Cutoff, S - GLO	7.01794e-15	kg SO2 eq
	0.018		Demolition of a football pitch: Natural Gras	6.13925e-14	kg SO2 eq				0.0002	market for waste polyethylene | waste polyethylene | Cutoff, S - NO	6.57931e-17	kg SO2 eq				0.0002	market for waste polyethylene | waste polyethylene | Cutoff, S - NO	6.57931e-17	kg SO2 eq				0.0026	market for waste concrete | waste concrete | Cutoff, S - Europe without Switzerland	1.55431e-15	kg SO2 eq
		0.0078	treatment of inert waste, sanitary landfill | inert waste | Cutoff, S - Europe without Switzerland	2.64988e-14	kg SO2 eq				0.0001	market for scrap steel | scrap steel | Cutoff, S - Europe without Switzerland	4.06492e-17	kg SO2 eq				0.0001	market for scrap steel | scrap steel | Cutoff, S - Europe without Switzerland	4.06492e-17	kg SO2 eq				0.0013	market for waste reinforced concrete | waste reinforced concrete | Cutoff, S - Europe without Switzerland	8.09435e-16	kg SO2 eq
		0.0055	market for waste concrete | waste concrete | Cutoff, S - Europe without Switzerland	1.891e-14	kg SO2 eq			0.0492		GoE - Wood-Based Infill	1.52459e-14	kg SO2 eq			0.0437		ELT - Base Case	1.34654e-14	kg SO2 eq				0.0007	market for waste polypropylene | waste polypropylene | Cutoff, S - NO	3.94719e-16	kg SO2 eq
		0.0041	diesel, burned in building machine | diesel, burned in building machine | Cutoff, S - GLO	1.40359e-14	kg SO2 eq				0.0396	Birch wood infill	1.22791e-14	kg SO2 eq				0.0329	treatment of waste rubber, unspecified, municipal incineration | waste rubber, unspecified | Cutoff, S - Europe without Switzerland	1.01292e-14	kg SO2 eq				0.0001	market for waste polyethylene | waste polyethylene | Cutoff, S - NO	6.57931e-17	kg SO2 eq
		0.0005	market for waste reinforced concrete | waste reinforced concrete | Cutoff, S - Europe without Switzerland	1.61887e-15	kg SO2 eq				0.0096	treatment of waste wood, untreated, municipal incineration | waste wood, untreated | Cutoff, S - RoW	2.96673e-15	kg SO2 eq				0.0108	Production of ELT	3.33617e-15	kg SO2 eq				0.0001	market for scrap steel | scrap steel | Cutoff, S - Europe without Switzerland	4.06492e-17	kg SO2 eq
		0	market for waste polyethylene | waste polyethylene | Cutoff, S - NO	1.31586e-16	kg SO2 eq			0.0397		Maintenance: Artificial Gras	1.23071e-14	kg SO2 eq			0.0399	0	Maintenance: Artificial Gras	1.23071e-14	kg SO2 eq			0.0204		Maintenance: Artificial Gras	1.23071e-14	kg SO2 eq
		0	market for waste polypropylene | waste polypropylene | Cutoff, S - NO	1.15999e-16	kg SO2 eq				0.0312	diesel, burned in building machine | diesel, burned in building machine | Cutoff, S - GLO	9.67335e-15	kg SO2 eq				0.0314	diesel, burned in building machine | diesel, burned in building machine | Cutoff, S - GLO	9.67335e-15	kg SO2 eq				0.016	diesel, burned in building machine | diesel, burned in building machine | Cutoff, S - GLO	9.67335e-15	kg SO2 eq
		0	market for scrap steel | scrap steel | Cutoff, S - Europe without Switzerland	8.12983e-17	kg SO2 eq				0.0074	market for irrigation | irrigation | Cutoff, S - DE	2.28329e-15	kg SO2 eq				0.0074	market for irrigation | irrigation | Cutoff, S - DE	2.28329e-15	kg SO2 eq				0.0038	market for irrigation | irrigation | Cutoff, S - DE	2.28329e-15	kg SO2 eq
	0.0138		Football Stadium: Consturction of Piping System - NO	4.70517e-14	kg SO2 eq				0.0009	treatment of municipal solid waste, incineration | municipal solid waste | Cutoff, S - NO	2.68738e-16	kg SO2 eq				0.0009	treatment of municipal solid waste, incineration | municipal solid waste | Cutoff, S - NO	2.68738e-16	kg SO2 eq				0.0004	treatment of municipal solid waste, incineration | municipal solid waste | Cutoff, S - NO	2.68738e-16	kg SO2 eq
		0.0059	market for gravel, round | gravel, round | Cutoff, S - RoW	2.00834e-14	kg SO2 eq				0.0002	treatment of biowaste by anaerobic digestion | biowaste | Cutoff, S - RoW	7.68562e-17	kg SO2 eq				0.0002	treatment of biowaste by anaerobic digestion | biowaste | Cutoff, S - RoW	7.68562e-17	kg SO2 eq				0.0001	treatment of biowaste by anaerobic digestion | biowaste | Cutoff, S - RoW	7.68562e-17	kg SO2 eq
		0.0056	diesel, burned in building machine | diesel, burned in building machine | Cutoff, S - GLO	1.89674e-14	kg SO2 eq					market for electricity, medium voltage | electricity, medium voltage | Cutoff, S - NO	4.85885e-18	kg SO2 eq				0	market for electricity, medium voltage | electricity, medium voltage | Cutoff, S - NO	4.85885e-18	kg SO2 eq				0	market for electricity, medium voltage | electricity, medium voltage | Cutoff, S - NO	4.85885e-18	kg SO2 eq
		0.001	market for polyethylene, high density, granulate | polyethylene, high density, granulate | Cutoff, S - GLO	3.44234e-15	kg SO2 eq			0.0257	0	Construction of Artificial Gras	7.97838e-15	kg SO2 eq			0.0259	0	Construction of Artificial Gras	7.97838e-15	kg SO2 eq			0.0132		Construction of Artificial Gras	7.97838e-15	kg SO2 eq
		0.001	market for polypropylene, granulate | polypropylene, granulate | Cutoff, S - GLO	3.40002e-15	kg SO2 eq				0.0153	market for silica sand | silica sand | Cutoff, S - GLO	4.73573e-15	kg SO2 eq				0.0154	market for silica sand | silica sand | Cutoff, S - GLO	4.73573e-15	kg SO2 eq				0.0078	market for silica sand | silica sand | Cutoff, S - GLO	4.73573e-15	kg SO2 eq
		0.0003	extrusion, plastic pipes | extrusion, plastic pipes | Cutoff, S - RER	1.01915e-15	kg SO2 eq				0.0059	diesel, burned in building machine | diesel, burned in building machine | Cutoff, S - GLO	1.83351e-15	kg SO2 eq				0.0059	diesel, burned in building machine | diesel, burned in building machine | Cutoff, S - GLO	1.83351e-15	kg SO2 eq				0.003	diesel, burned in building machine | diesel, burned in building machine | Cutoff, S - GLO	1.83351e-15	kg SO2 eq
		0	market for concrete, normal strength | concrete, normal strength | Cutoff, S - RoW	1.39297e-16	kg SO2 eq				0.0023	polyethylene production, high density, granulate | polyethylene, high density, granulate | Cutoff, S - RER	7.1236e-16	kg SO2 eq				0.0023	polyethylene production, high density, granulate | polyethylene, high density, granulate | Cutoff, S - RER	7.1236e-16	kg SO2 eq				0.0012	polyethylene production, high density, granulate | polyethylene, high density, granulate | Cutoff, S - RER	7.1236e-16	kg SO2 eq
	0.0106		Football Stadium: Construction of Groundworks - Natural Turf - NO	3.61711e-14	kg SO2 eq				0.0022	polypropylene production, granulate | polypropylene, granulate | Cutoff, S - RER	6.96763e-16	kg SO2 eq				0.0023	polypropylene production, granulate | polypropylene, granulate | Cutoff, S - RER	6.96763e-16	kg SO2 eq				0.0012	polypropylene production, granulate | polypropylene, granulate | Cutoff, S - RER	6.96763e-16	kg SO2 eq
		0.0067	diesel, burned in building machine | diesel, burned in building machine | Cutoff, S - GLO	2.28873e-14	kg SO2 eq
		0.0039	treatment of biowaste by anaerobic digestion | biowaste | Cutoff, S - RoW	1.32838e-14	kg SO2 eq
		0	Football Stadium: Construction of the Drainage Layer - NO	3.51285e-14	kg SO2 eq			1
		0.0078	market for sand | sand | Cutoff, S - RoW	2.65552e-14	kg SO2 eq
		0.0025	diesel, burned in building machine | diesel, burned in building machine | Cutoff, S - GLO	8.57325e-15	kg SO2 eq
	0.0055		Renovation: Natural Turf	1.89089e-14	kg SO2 eq
		0.0024	treatment of biowaste by anaerobic digestion | biowaste | Cutoff, S - RoW	8.31183e-15	kg SO2 eq
		0.002	Construction of natural gras	6.91738e-15	kg SO2 eq
		0.0011	diesel, burned in building machine | diesel, burned in building machine | Cutoff, S - GLO	3.67967e-15	kg SO2 eq

## Sheet: FreshwaterEcotoxicity
Natural Gras							Wood-Based Infill							ELT - Base							EPDM - Base
Percentual Contribution			Process	Amount	Unit		Percentual Contribution			Process	Amount	Unit		Percentual Contribution			Process	Amount	Unit		Percentual Contribution			Process	Amount	Unit
1		0	Natural Gras - Benchmark	3.93587e+06	CTUe		1			GOE - Wood based infill	115758	CTUe		1			Artificial Gras - ELT - Base Case	199650	CTUe		1			#REF!	276596	CTUe
	0.9406	0	Demolition of a football pitch: Natural Gras	3702250	CTUe			0.3375		Football Stadium: Infrastructure, Lights, Fence and Mowing edges	39063.8	CTUe			0.4459		ELT - Base Case	89024.8	CTUe			0.6		EPDM - Base Case	165972	CTUe
		0.9359	treatment of inert waste, sanitary landfill | inert waste | Cutoff, S - Europe without Switzerland	3.6837e+06	CTUe				0.2284	electronic component production, passive, unspecified | electronic component, passive, unspecified | Cutoff, S - GLO	26436.9	CTUe				0.4121	Production of ELT	82266.9	CTUe				0.5767	synthetic rubber production | synthetic rubber | Cutoff, S - RER	159519	CTUe
		0.0039	market for waste reinforced concrete | waste reinforced concrete | Cutoff, S - Europe without Switzerland	15517.8	CTUe				0.0275	aluminium production, primary, ingot | aluminium, primary, ingot | Cutoff, S - IAI Area, EU27 & EFTA	3180.56	CTUe					treatment of waste rubber, unspecified, municipal incineration | waste rubber, unspecified | Cutoff, S - Europe without Switzerland	6757.96	CTUe				0.0233	treatment of waste rubber, unspecified, municipal incineration | waste rubber, unspecified | Cutoff, S - Europe without Switzerland	6453.21	CTUe
		0.0005	market for waste concrete | waste concrete | Cutoff, S - Europe without Switzerland	2125	CTUe				0.0237	market for concrete, normal strength | concrete, normal strength | Cutoff, S - AT	2741.52	CTUe			0.1957		Football Stadium: Infrastructure, Lights, Fence and Mowing edges	39063.8	CTUe			0.1412		Football Stadium: Infrastructure, Lights, Fence and Mowing edges	39063.8	CTUe
		0.0001	market for scrap steel | scrap steel | Cutoff, S - Europe without Switzerland	399.245	CTUe				0.0209	market for steel, low-alloyed | steel, low-alloyed | Cutoff, S - GLO	2415.81	CTUe				0.1324	electronic component production, passive, unspecified | electronic component, passive, unspecified | Cutoff, S - GLO	26436.9	CTUe				0.0956	electronic component production, passive, unspecified | electronic component, passive, unspecified | Cutoff, S - GLO	26436.9	CTUe
		0.0001	diesel, burned in building machine | diesel, burned in building machine | Cutoff, S - GLO	289.013	CTUe				0.0129	market for reinforcing steel | reinforcing steel | Cutoff, S - GLO	1487.96	CTUe				0.0159	aluminium production, primary, ingot | aluminium, primary, ingot | Cutoff, S - IAI Area, EU27 & EFTA	3180.56	CTUe				0.0115	aluminium production, primary, ingot | aluminium, primary, ingot | Cutoff, S - IAI Area, EU27 & EFTA	3180.56	CTUe
		0	market for waste polyethylene | waste polyethylene | Cutoff, S - NO	115.65	CTUe				0.0123	metal working, average for aluminium product manufacturing | metal working, average for aluminium product manufacturing | Cutoff, S - RER	1425.95	CTUe				0.0137	market for concrete, normal strength | concrete, normal strength | Cutoff, S - AT	2741.52	CTUe				0.0099	market for concrete, normal strength | concrete, normal strength | Cutoff, S - AT	2741.52	CTUe
		0	market for waste polypropylene | waste polypropylene | Cutoff, S - NO	98.76	CTUe				0.0046	market for polyethylene, high density, granulate | polyethylene, high density, granulate | Cutoff, S - GLO	527.24	CTUe				0.0121	market for steel, low-alloyed | steel, low-alloyed | Cutoff, S - GLO	2415.81	CTUe				0.0087	market for steel, low-alloyed | steel, low-alloyed | Cutoff, S - GLO	2415.81	CTUe
	0.0299	0	Maintenance: Natural Gras	117778	CTUe				0.0035	concrete block production | concrete block | Cutoff, S - DE	405.879	CTUe				0.0075	market for reinforcing steel | reinforcing steel | Cutoff, S - GLO	1487.96	CTUe				0.0054	market for reinforcing steel | reinforcing steel | Cutoff, S - GLO	1487.96	CTUe
		0.008	market for inorganic nitrogen fertiliser, as N | inorganic nitrogen fertiliser, as N | Cutoff, S - NO	31319.5	CTUe				0.0023	market for polypropylene, granulate | polypropylene, granulate | Cutoff, S - GLO	260.55	CTUe				0.0071	metal working, average for aluminium product manufacturing | metal working, average for aluminium product manufacturing | Cutoff, S - RER	1425.95	CTUe			0		metal working, average for aluminium product manufacturing | metal working, average for aluminium product manufacturing | Cutoff, S - RER	1425.95	CTUe
		0.0078	market for irrigation | irrigation | Cutoff, S - DE	30882.9	CTUe				0.0013	market for extrusion, plastic pipes | extrusion, plastic pipes | Cutoff, S - GLO	148.641	CTUe				0.0026	market for polyethylene, high density, granulate | polyethylene, high density, granulate | Cutoff, S - GLO	527.24	CTUe				0.0019	market for polyethylene, high density, granulate | polyethylene, high density, granulate | Cutoff, S - GLO	527.24	CTUe
		0.0047	market for inorganic potassium fertiliser, as K2O | inorganic potassium fertiliser, as K2O | Cutoff, S - NO	18420.2	CTUe				0.0003	diesel, burned in building machine | diesel, burned in building machine | Cutoff, S - GLO	32.8069	CTUe				0.002	concrete block production | concrete block | Cutoff, S - DE	405.879	CTUe				0.0015	concrete block production | concrete block | Cutoff, S - DE	405.879	CTUe
		0.0022	treatment of municipal solid waste, incineration | municipal solid waste | Cutoff, S - NO	8853.58	CTUe			0.2226		Construction of the base layer - Football Pitch - Artificial Turf	25764.4	CTUe				0.0013	market for polypropylene, granulate | polypropylene, granulate | Cutoff, S - GLO	260.55	CTUe				0.0009	market for polypropylene, granulate | polypropylene, granulate | Cutoff, S - GLO	260.55	CTUe
		0.0018	market for grass seed, organic, for sowing | grass seed, organic, for sowing | Cutoff, S - GLO	6959.33	CTUe				0.1105	mastic asphalt production | mastic asphalt | Cutoff, S - RoW	12793.3	CTUe				0.0007	market for extrusion, plastic pipes | extrusion, plastic pipes | Cutoff, S - GLO	148.641	CTUe				0.0005	market for extrusion, plastic pipes | extrusion, plastic pipes | Cutoff, S - GLO	148.641	CTUe
		0.0015	treatment of biowaste by anaerobic digestion | biowaste | Cutoff, S - RoW	5877.79	CTUe				0.105	market for gravel, crushed | gravel, crushed | Cutoff, S - RoW	12153.7	CTUe				0.0002	diesel, burned in building machine | diesel, burned in building machine | Cutoff, S - GLO	32.8069	CTUe				0.0001	diesel, burned in building machine | diesel, burned in building machine | Cutoff, S - GLO	32.8069	CTUe
		0.0012	market for inorganic phosphorus fertiliser, as P2O5 | inorganic phosphorus fertiliser, as P2O5 | Cutoff, S - NO	4805.58	CTUe				0.0041	market for sand | sand | Cutoff, S - RoW	475.269	CTUe			0.129		Construction of the base layer - Football Pitch - Artificial Turf	25764.4	CTUe			0.0931		Construction of the base layer - Football Pitch - Artificial Turf	25764.4	CTUe
		0.0009	market for alkyd paint, white, without solvent, in 60% solution state | alkyd paint, white, without solvent, in 60% solution state | Cutoff, S - RER	3402.64	CTUe				0.0018	concrete block production | concrete block | Cutoff, S - RoW	202.89	CTUe				0.0641	mastic asphalt production | mastic asphalt | Cutoff, S - RoW	12793.3	CTUe				0.0463	mastic asphalt production | mastic asphalt | Cutoff, S - RoW	12793.3	CTUe
		0.0007	market for sand | sand | Cutoff, S - CH	2701.47	CTUe				0.0012	diesel, burned in building machine | diesel, burned in building machine | Cutoff, S - GLO	139.299	CTUe				0.0609	market for gravel, crushed | gravel, crushed | Cutoff, S - RoW	12153.7	CTUe				0.0439	market for gravel, crushed | gravel, crushed | Cutoff, S - RoW	12153.7	CTUe
		0.0005	Construction of natural gras	1970.03	CTUe			0.1277		Renovation: Artificial Turf	14784.5	CTUe				0.0024	market for sand | sand | Cutoff, S - RoW	475.269	CTUe				0.0017	market for sand | sand | Cutoff, S - RoW	475.269	CTUe
		0.0004	diesel, burned in building machine | diesel, burned in building machine | Cutoff, S - GLO	1671.59	CTUe				0.0452	polyethylene production, high density, granulate | polyethylene, high density, granulate | Cutoff, S - RER	5227.06	CTUe				0.001	concrete block production | concrete block | Cutoff, S - RoW	202.89	CTUe				0.0007	concrete block production | concrete block | Cutoff, S - RoW	202.89	CTUe
		0.0002	market for pesticide, unspecified | pesticide, unspecified | Cutoff, S - GLO	629.042	CTUe				0.0427	polypropylene production, granulate | polypropylene, granulate | Cutoff, S - RER	4941.04	CTUe				0.0007	diesel, burned in building machine | diesel, burned in building machine | Cutoff, S - GLO	139.299	CTUe				0.0005	diesel, burned in building machine | diesel, burned in building machine | Cutoff, S - GLO	139.299	CTUe
		0	market for fosetyl-Al | fosetyl-Al | Cutoff, S - GLO	100.809	CTUe				0.029	treatment of waste plastic, mixture, municipal incineration | waste plastic, mixture | Cutoff, S - RoW	3360.29	CTUe			0.0741		Renovation: Artificial Turf	14784.5	CTUe				0	Renovation: Artificial Turf	14784.5	CTUe
		0	market for steel, low-alloyed, hot rolled | steel, low-alloyed, hot rolled | Cutoff, S - GLO	92.4771	CTUe				0.0093	silica sand production | silica sand | Cutoff, S - RoW	1079.63	CTUe				0.0262	polyethylene production, high density, granulate | polyethylene, high density, granulate | Cutoff, S - RER	5227.06	CTUe				0.0189	polyethylene production, high density, granulate | polyethylene, high density, granulate | Cutoff, S - RER	5227.06	CTUe
		0	market for chlorothalonil | chlorothalonil | Cutoff, S - GLO	49.4433	CTUe				0.0015	diesel, burned in building machine | diesel, burned in building machine | Cutoff, S - GLO	176.532	CTUe				0.0247	polypropylene production, granulate | polypropylene, granulate | Cutoff, S - RER	4941.04	CTUe				0.0179	polypropylene production, granulate | polypropylene, granulate | Cutoff, S - RER	4941.04	CTUe
		0	market for electricity, medium voltage | electricity, medium voltage | Cutoff, S - NO	25.7683	CTUe			0.1159		Maintenance: Artificial Gras	13419	CTUe				0.0168	treatment of waste plastic, mixture, municipal incineration | waste plastic, mixture | Cutoff, S - RoW	3360.29	CTUe				0.0121	treatment of waste plastic, mixture, municipal incineration | waste plastic, mixture | Cutoff, S - RoW	3360.29	CTUe
		0	market for tap water | tap water | Cutoff, S - Europe without Switzerland	6.54004	CTUe				0.0715	treatment of municipal solid waste, incineration | municipal solid waste | Cutoff, S - NO	8271.12	CTUe				0.0054	silica sand production | silica sand | Cutoff, S - RoW	1079.63	CTUe				0.0039	silica sand production | silica sand | Cutoff, S - RoW	1079.63	CTUe
	0.0199	0	Football Stadium: Infrastructure, Lights, Fence and Mowing edges	78127.5	CTUe				0.0425	market for irrigation | irrigation | Cutoff, S - DE	4923.94	CTUe				0.0009	diesel, burned in building machine | diesel, burned in building machine | Cutoff, S - GLO	176.532	CTUe				0.0006	diesel, burned in building machine | diesel, burned in building machine | Cutoff, S - GLO	176.532	CTUe
		0.0134	electronic component production, passive, unspecified | electronic component, passive, unspecified | Cutoff, S - GLO	52873.8	CTUe				0.0017	diesel, burned in building machine | diesel, burned in building machine | Cutoff, S - GLO	199.185	CTUe			0.0672		Maintenance: Artificial Gras	13419	CTUe			0.0485		Maintenance: Artificial Gras	13419	CTUe
		0.0016	aluminium production, primary, ingot | aluminium, primary, ingot | Cutoff, S - IAI Area, EU27 & EFTA	6361.12	CTUe				0.0001	treatment of biowaste by anaerobic digestion | biowaste | Cutoff, S - RoW	14.8596	CTUe				0.0414	treatment of municipal solid waste, incineration | municipal solid waste | Cutoff, S - NO	8271.12	CTUe				0.0299	treatment of municipal solid waste, incineration | municipal solid waste | Cutoff, S - NO	8271.12	CTUe
		0.0014	market for concrete, normal strength | concrete, normal strength | Cutoff, S - AT	5483.04	CTUe				0.0001	market for electricity, medium voltage | electricity, medium voltage | Cutoff, S - NO	9.93527	CTUe				0.0247	market for irrigation | irrigation | Cutoff, S - DE	4923.94	CTUe				0.0178	market for irrigation | irrigation | Cutoff, S - DE	4923.94	CTUe
		0.0012	market for steel, low-alloyed | steel, low-alloyed | Cutoff, S - GLO	4831.62	CTUe			0.0845		Demolition of a football pitch: Artificial Gras	9784.62	CTUe				0.001	diesel, burned in building machine | diesel, burned in building machine | Cutoff, S - GLO	199.185	CTUe				0.0007	diesel, burned in building machine | diesel, burned in building machine | Cutoff, S - GLO	199.185	CTUe
		0.0008	market for reinforcing steel | reinforcing steel | Cutoff, S - GLO	2975.93	CTUe				0.067	market for waste reinforced concrete | waste reinforced concrete | Cutoff, S - Europe without Switzerland	7758.88	CTUe				0.0001	treatment of biowaste by anaerobic digestion | biowaste | Cutoff, S - RoW	14.8596	CTUe			0		treatment of biowaste by anaerobic digestion | biowaste | Cutoff, S - RoW	14.8596	CTUe
		0.0007	metal working, average for aluminium product manufacturing | metal working, average for aluminium product manufacturing | Cutoff, S - RER	2851.89	CTUe				0.0096	treatment of waste asphalt, sanitary landfill | waste asphalt | Cutoff, S - RoW	1113.08	CTUe				0	market for electricity, medium voltage | electricity, medium voltage | Cutoff, S - NO	9.93527	CTUe				0	market for electricity, medium voltage | electricity, medium voltage | Cutoff, S - NO	9.93527	CTUe
		0.0003	market for polyethylene, high density, granulate | polyethylene, high density, granulate | Cutoff, S - GLO	1054.48	CTUe				0.0029	market for waste polypropylene | waste polypropylene | Cutoff, S - NO	336.058	CTUe			0.049		Demolition of a football pitch: Artificial Gras	9784.62	CTUe				0	Demolition of a football pitch: Artificial Gras	9784.62	CTUe
		0.0002	concrete block production | concrete block | Cutoff, S - DE	811.758	CTUe				0.0017	market for scrap steel | scrap steel | Cutoff, S - Europe without Switzerland	199.622	CTUe				0.0389	market for waste reinforced concrete | waste reinforced concrete | Cutoff, S - Europe without Switzerland	7758.88	CTUe				0.0281	market for waste reinforced concrete | waste reinforced concrete | Cutoff, S - Europe without Switzerland	7758.88	CTUe
		0.0001	market for polypropylene, granulate | polypropylene, granulate | Cutoff, S - GLO	521.1	CTUe				0.0015	market for waste concrete | waste concrete | Cutoff, S - Europe without Switzerland	174.664	CTUe				0.0056	treatment of waste asphalt, sanitary landfill | waste asphalt | Cutoff, S - RoW	1113.08	CTUe				0.004	treatment of waste asphalt, sanitary landfill | waste asphalt | Cutoff, S - RoW	1113.08	CTUe
		0.0001	market for extrusion, plastic pipes | extrusion, plastic pipes | Cutoff, S - GLO	297.282	CTUe				0.0012	diesel, burned in building machine | diesel, burned in building machine | Cutoff, S - GLO	144.507	CTUe				0.0017	market for waste polypropylene | waste polypropylene | Cutoff, S - NO	336.058	CTUe				0.0012	market for waste polypropylene | waste polypropylene | Cutoff, S - NO	336.058	CTUe
		0	diesel, burned in building machine | diesel, burned in building machine | Cutoff, S - GLO	65.6137	CTUe				0.0005	market for waste polyethylene | waste polyethylene | Cutoff, S - NO	57.825	CTUe				0.001	market for scrap steel | scrap steel | Cutoff, S - Europe without Switzerland	199.622	CTUe				0.0007	market for scrap steel | scrap steel | Cutoff, S - Europe without Switzerland	199.622	CTUe
	0.0039	0	Construction of the base layer - Football Pitch - Natural Turf	15208.3	CTUe			0.0443		GoE - Wood-Based Infill	5132.67	CTUe				0.0009	market for waste concrete | waste concrete | Cutoff, S - Europe without Switzerland	174.664	CTUe			0		market for waste concrete | waste concrete | Cutoff, S - Europe without Switzerland	174.664	CTUe
		0.0037	market for silica sand | silica sand | Cutoff, S - GLO	14751.3	CTUe				0.0385	Birch wood infill	4452.88	CTUe				0.0007	diesel, burned in building machine | diesel, burned in building machine | Cutoff, S - GLO	144.507	CTUe				0.0005	diesel, burned in building machine | diesel, burned in building machine | Cutoff, S - GLO	144.507	CTUe
		0.0001	limestone production, crushed, washed | limestone, crushed, washed | Cutoff, S - RoW	267.979	CTUe				0.0059	treatment of waste wood, untreated, municipal incineration | waste wood, untreated | Cutoff, S - RoW	679.794	CTUe				0.0003	market for waste polyethylene | waste polyethylene | Cutoff, S - NO	57.825	CTUe				0.0002	market for waste polyethylene | waste polyethylene | Cutoff, S - NO	57.825	CTUe
		0	diesel, burned in building machine | diesel, burned in building machine | Cutoff, S - GLO	189.03	CTUe			0.0355		Football Stadium: Consturction of Piping System - NO	4109.75	CTUe			0.0206		Football Stadium: Consturction of Piping System - NO	4109.75	CTUe				0	Football Stadium: Consturction of Piping System - NO	4109.75	CTUe
	0.0021	0	Football Stadium: Consturction of Piping System - NO	8219.5	CTUe				0.0214	market for gravel, round | gravel, round | Cutoff, S - RoW	2476.12	CTUe				0.0124	market for gravel, round | gravel, round | Cutoff, S - RoW	2476.12	CTUe				0.009	market for gravel, round | gravel, round | Cutoff, S - RoW	2476.12	CTUe
		0.0013	market for gravel, round | gravel, round | Cutoff, S - RoW	4952.25	CTUe				0.0055	market for polyethylene, high density, granulate | polyethylene, high density, granulate | Cutoff, S - GLO	632.688	CTUe				0.0032	market for polyethylene, high density, granulate | polyethylene, high density, granulate | Cutoff, S - GLO	632.688	CTUe				0.0023	market for polyethylene, high density, granulate | polyethylene, high density, granulate | Cutoff, S - GLO	632.688	CTUe
		0.0003	market for polyethylene, high density, granulate | polyethylene, high density, granulate | Cutoff, S - GLO	1265.38	CTUe				0.0054	market for polypropylene, granulate | polypropylene, granulate | Cutoff, S - GLO	625.319	CTUe				0.0031	market for polypropylene, granulate | polypropylene, granulate | Cutoff, S - GLO	625.319	CTUe				0.0023	market for polypropylene, granulate | polypropylene, granulate | Cutoff, S - GLO	625.319	CTUe
		0.0003	market for polypropylene, granulate | polypropylene, granulate | Cutoff, S - GLO	1250.64	CTUe				0.0017	diesel, burned in building machine | diesel, burned in building machine | Cutoff, S - GLO	195.279	CTUe				0.001	diesel, burned in building machine | diesel, burned in building machine | Cutoff, S - GLO	195.279	CTUe				0.0007	diesel, burned in building machine | diesel, burned in building machine | Cutoff, S - GLO	195.279	CTUe
		0.0001	diesel, burned in building machine | diesel, burned in building machine | Cutoff, S - GLO	390.558	CTUe				0.0014	extrusion, plastic pipes | extrusion, plastic pipes | Cutoff, S - RER	160.627	CTUe				0.0008	extrusion, plastic pipes | extrusion, plastic pipes | Cutoff, S - RER	160.627	CTUe			0		extrusion, plastic pipes | extrusion, plastic pipes | Cutoff, S - RER	160.627	CTUe
		0.0001	extrusion, plastic pipes | extrusion, plastic pipes | Cutoff, S - RER	321.253	CTUe				0.0002	market for concrete, normal strength | concrete, normal strength | Cutoff, S - RoW	19.7044	CTUe				0.0001	market for concrete, normal strength | concrete, normal strength | Cutoff, S - RoW	19.7044	CTUe				0.0001	market for concrete, normal strength | concrete, normal strength | Cutoff, S - RoW	19.7044	CTUe
		0	market for concrete, normal strength | concrete, normal strength | Cutoff, S - RoW	39.4087	CTUe			0.0213		Football Stadium: Construction of Groundworks - Artificial Turf - NO	2468.5	CTUe			0.0124		Football Stadium: Construction of Groundworks - Artificial Turf - NO	2468.5	CTUe				0	Football Stadium: Construction of Groundworks - Artificial Turf - NO	2468.5	CTUe
	0.0014	0	Football Stadium: Construction of the Drainage Layer - NO	5678.21	CTUe				0.0111	treatment of biowaste by anaerobic digestion | biowaste | Cutoff, S - RoW	1284.16	CTUe				0.0064	treatment of biowaste by anaerobic digestion | biowaste | Cutoff, S - RoW	1284.16	CTUe				0.0046	treatment of biowaste by anaerobic digestion | biowaste | Cutoff, S - RoW	1284.16	CTUe
		0.0014	market for sand | sand | Cutoff, S - RoW	5501.67	CTUe				0.0075	market for quicklime, milled, packed | quicklime, milled, packed | Cutoff, S - RER	871.89	CTUe				0.0044	market for quicklime, milled, packed | quicklime, milled, packed | Cutoff, S - RER	871.89	CTUe				0.0032	market for quicklime, milled, packed | quicklime, milled, packed | Cutoff, S - RER	871.89	CTUe
		0	diesel, burned in building machine | diesel, burned in building machine | Cutoff, S - GLO	176.532	CTUe				0.0027	diesel, burned in building machine | diesel, burned in building machine | Cutoff, S - GLO	312.446	CTUe				0.0016	diesel, burned in building machine | diesel, burned in building machine | Cutoff, S - GLO	312.446	CTUe				0.0011	diesel, burned in building machine | diesel, burned in building machine | Cutoff, S - GLO	312.446	CTUe
		0	Construction of natural gras	3530.52	CTUe			0.0106		Construction of Artificial Gras	1230.5	CTUe			0.0062		Construction of Artificial Gras	1230.5	CTUe			0.0044		Construction of Artificial Gras	1230.5	CTUe
		0.0004	market for inorganic phosphorus fertiliser, as P2O5 | inorganic phosphorus fertiliser, as P2O5 | Cutoff, S - NO	1601.87	CTUe				0.0059	market for silica sand | silica sand | Cutoff, S - GLO	684.337	CTUe				0.0034	market for silica sand | silica sand | Cutoff, S - GLO	684.337	CTUe				0.0025	market for silica sand | silica sand | Cutoff, S - GLO	684.337	CTUe
		0.0002	market for inorganic nitrogen fertiliser, as N | inorganic nitrogen fertiliser, as N | Cutoff, S - NO	695.987	CTUe				0.0023	polyethylene production, high density, granulate | polyethylene, high density, granulate | Cutoff, S - RER	261.352	CTUe				0.0013	polyethylene production, high density, granulate | polyethylene, high density, granulate | Cutoff, S - RER	261.352	CTUe				0.0009	polyethylene production, high density, granulate | polyethylene, high density, granulate | Cutoff, S - RER	261.352	CTUe
		0.0002	irrigation, sprinkler | irrigation | Cutoff, S - DE	651.979	CTUe				0.0021	polypropylene production, granulate | polypropylene, granulate | Cutoff, S - RER	247.052	CTUe				0.0012	polypropylene production, granulate | polypropylene, granulate | Cutoff, S - RER	247.052	CTUe				0.0009	polypropylene production, granulate | polypropylene, granulate | Cutoff, S - RER	247.052	CTUe
		0.0001	market for inorganic potassium fertiliser, as K2O | inorganic potassium fertiliser, as K2O | Cutoff, S - NO	307.004	CTUe				0.0003	diesel, burned in building machine | diesel, burned in building machine | Cutoff, S - GLO	37.754	CTUe				0.0002	diesel, burned in building machine | diesel, burned in building machine | Cutoff, S - GLO	37.754	CTUe				0.0001	diesel, burned in building machine | diesel, burned in building machine | Cutoff, S - GLO	37.754	CTUe
		0	diesel, burned in building machine | diesel, burned in building machine | Cutoff, S - GLO	151.276	CTUe
		0	market for grass seed, organic, for sowing | grass seed, organic, for sowing | Cutoff, S - GLO	122.398	CTUe
	0.0008	0	Football Stadium: Construction of Groundworks - Natural Turf - NO	3039.6	CTUe			0.9999
		0.0007	treatment of biowaste by anaerobic digestion | biowaste | Cutoff, S - RoW	2568.33	CTUe
		0.0001	diesel, burned in building machine | diesel, burned in building machine | Cutoff, S - GLO	471.275	CTUe
	0.0005	0	Renovation: Natural Turf	2035.86	CTUe
		0.0004	treatment of biowaste by anaerobic digestion | biowaste | Cutoff, S - RoW	1607.04	CTUe
		0.0001	Construction of natural gras	353.052	CTUe
		0	diesel, burned in building machine | diesel, burned in building machine | Cutoff, S - GLO	75.7683	CTUe

## Sheet: FreshwaterEutrophication
Natural Gras							Wood-Based Infill								ELT - Base							EPDM - Base
Percentual Contribution			Process	Amount	Unit		Percentual Contribution				Process	Amount	Unit		Percentual Contribution			Process	Amount	Unit		Percentual Contribution			Process	Amount	Unit
1			Natural Gras - Benchmark	0.000191658	kg PO4 P-lim eq		1				GOE - Wood based infill	3.8308e-05	kg PO4 P-lim eq		1			Artificial Gras - ELT - Base Case	4.62402e-05	kg PO4 P-lim eq		1			Artificial Gras - EPDM - Base Case	6.16235e-05	kg PO4 P-lim eq
	0.8596		Maintenance: Natural Gras	0.000164755	kg PO4 P-lim eq			0.7933			GoE - Wood-Based Infill	3.03894e-05	kg PO4 P-lim eq			0.5433		ELT - Base Case	2.5124e-05	kg PO4 P-lim eq			0.6573		EPDM - Base Case	4.05071e-05	kg PO4 P-lim eq
		0.2537	market for grass seed, organic, for sowing | grass seed, organic, for sowing | Cutoff, S - GLO	4.86192e-05	kg PO4 P-lim eq				0.7074		Birch wood infill	2.70975e-05	kg PO4 P-lim eq				0.4667	treatment of waste rubber, unspecified, municipal incineration | waste rubber, unspecified | Cutoff, S - Europe without Switzerland	2.15817e-05	kg PO4 P-lim eq				0.3344	treatment of waste rubber, unspecified, municipal incineration | waste rubber, unspecified | Cutoff, S - Europe without Switzerland	2.06083e-05	kg PO4 P-lim eq
		0.0799	market for inorganic nitrogen fertiliser, as N | inorganic nitrogen fertiliser, as N | Cutoff, S - NO	1.53212e-05	kg PO4 P-lim eq					0.6857	market for wood chips and particles, willow | wood chips and particles, willow | Cutoff, S - RER	2.62664e-05	kg PO4 P-lim eq				0.0766	Production of ELT	3.54229e-06	kg PO4 P-lim eq				0.3229	synthetic rubber production | synthetic rubber | Cutoff, S - RER	1.98987e-05	kg PO4 P-lim eq
		0.0572	market for inorganic potassium fertiliser, as K2O | inorganic potassium fertiliser, as K2O | Cutoff, S - NO	1.09542e-05	kg PO4 P-lim eq					0.0215	treatment of waste wood, untreated, municipal incineration | waste wood, untreated | Cutoff, S - RoW	8.22969e-07	kg PO4 P-lim eq			0.1232		Construction of the base layer - Football Pitch - Artificial Turf	5.69792e-06	kg PO4 P-lim eq			0.0925		Construction of the base layer - Football Pitch - Artificial Turf	5.69792e-06	kg PO4 P-lim eq
		0.0537	treatment of biowaste by anaerobic digestion | biowaste | Cutoff, S - RoW	1.02917e-05	kg PO4 P-lim eq						market for electricity, medium voltage | electricity, medium voltage | Cutoff, S - NO	8.04688e-09	kg PO4 P-lim eq				0.0842	mastic asphalt production | mastic asphalt | Cutoff, S - RoW	3.8925e-06	kg PO4 P-lim eq				0.0632	mastic asphalt production | mastic asphalt | Cutoff, S - RoW	3.8925e-06	kg PO4 P-lim eq
		0.0172	market for alkyd paint, white, without solvent, in 60% solution state | alkyd paint, white, without solvent, in 60% solution state | Cutoff, S - RER	3.29083e-06	kg PO4 P-lim eq				0.0859		treatment of waste wood, untreated, municipal incineration | waste wood, untreated | Cutoff, S - RoW	3.29188e-06	kg PO4 P-lim eq				0.0344	market for gravel, crushed | gravel, crushed | Cutoff, S - RoW	1.59125e-06	kg PO4 P-lim eq				0.0258	market for gravel, crushed | gravel, crushed | Cutoff, S - RoW	1.59125e-06	kg PO4 P-lim eq
		0.0161	market for inorganic phosphorus fertiliser, as P2O5 | inorganic phosphorus fertiliser, as P2O5 | Cutoff, S - NO	3.09125e-06	kg PO4 P-lim eq			0.0558			Construction of the base layer - Football Pitch - Artificial Turf	2.13672e-06	kg PO4 P-lim eq				0.0024	diesel, burned in building machine | diesel, burned in building machine | Cutoff, S - GLO	1.125e-07	kg PO4 P-lim eq				0.0018	diesel, burned in building machine | diesel, burned in building machine | Cutoff, S - GLO	1.125e-07	kg PO4 P-lim eq
		0.0151	market for pesticide, unspecified | pesticide, unspecified | Cutoff, S - GLO	2.9e-06	kg PO4 P-lim eq				0.0381		mastic asphalt production | mastic asphalt | Cutoff, S - RoW	1.45969e-06	kg PO4 P-lim eq				0.0016	market for sand | sand | Cutoff, S - RoW	7.29167e-08	kg PO4 P-lim eq				0.0012	market for sand | sand | Cutoff, S - RoW	7.29167e-08	kg PO4 P-lim eq
		0.0077	Construction of natural gras	1.47042e-06	kg PO4 P-lim eq				0.0156		market for gravel, crushed | gravel, crushed | Cutoff, S - RoW	5.96719e-07	kg PO4 P-lim eq				0.0006	concrete block production | concrete block | Cutoff, S - RoW	2.875e-08	kg PO4 P-lim eq				0.0005	concrete block production | concrete block | Cutoff, S - RoW	2.875e-08	kg PO4 P-lim eq
		0.0072	market for fosetyl-Al | fosetyl-Al | Cutoff, S - GLO	1.38625e-06	kg PO4 P-lim eq				0.0011		diesel, burned in building machine | diesel, burned in building machine | Cutoff, S - GLO	4.21875e-08	kg PO4 P-lim eq			0.1021		Football Stadium: Infrastructure, Lights, Fence and Mowing edges	4.72146e-06	kg PO4 P-lim eq			0.0766		Football Stadium: Infrastructure, Lights, Fence and Mowing edges	4.72146e-06	kg PO4 P-lim eq
		0.007	diesel, burned in building machine | diesel, burned in building machine | Cutoff, S - GLO	1.35083e-06	kg PO4 P-lim eq				0.0007		market for sand | sand | Cutoff, S - RoW	2.73437e-08	kg PO4 P-lim eq				0.0515	market for steel, low-alloyed | steel, low-alloyed | Cutoff, S - GLO	2.38062e-06	kg PO4 P-lim eq				0.0386	market for steel, low-alloyed | steel, low-alloyed | Cutoff, S - GLO	2.38062e-06	kg PO4 P-lim eq
		0.0033	market for irrigation | irrigation | Cutoff, S - DE	6.3e-07	kg PO4 P-lim eq				0.0003		concrete block production | concrete block | Cutoff, S - RoW	1.07812e-08	kg PO4 P-lim eq				0.0221	market for reinforcing steel | reinforcing steel | Cutoff, S - GLO	1.02125e-06	kg PO4 P-lim eq				0.0166	market for reinforcing steel | reinforcing steel | Cutoff, S - GLO	1.02125e-06	kg PO4 P-lim eq
		0.0031	market for sand | sand | Cutoff, S - CH	5.97083e-07	kg PO4 P-lim eq			0.0462	0		Football Stadium: Infrastructure, Lights, Fence and Mowing edges	1.77055e-06	kg PO4 P-lim eq				0.0128	electronic component production, passive, unspecified | electronic component, passive, unspecified | Cutoff, S - GLO	5.90208e-07	kg PO4 P-lim eq				0.0096	electronic component production, passive, unspecified | electronic component, passive, unspecified | Cutoff, S - GLO	5.90208e-07	kg PO4 P-lim eq
		0.002	treatment of municipal solid waste, incineration | municipal solid waste | Cutoff, S - NO	3.89583e-07	kg PO4 P-lim eq				0.0233		market for steel, low-alloyed | steel, low-alloyed | Cutoff, S - GLO	8.92734e-07	kg PO4 P-lim eq				0.0066	market for concrete, normal strength | concrete, normal strength | Cutoff, S - AT	3.05833e-07	kg PO4 P-lim eq				0.005	market for concrete, normal strength | concrete, normal strength | Cutoff, S - AT	3.05833e-07	kg PO4 P-lim eq
		0.0004	market for steel, low-alloyed, hot rolled | steel, low-alloyed, hot rolled | Cutoff, S - GLO	8.58333e-08	kg PO4 P-lim eq				0.01		market for reinforcing steel | reinforcing steel | Cutoff, S - GLO	3.82969e-07	kg PO4 P-lim eq				0.0032	metal working, average for aluminium product manufacturing | metal working, average for aluminium product manufacturing | Cutoff, S - RER	1.48333e-07	kg PO4 P-lim eq				0.0024	metal working, average for aluminium product manufacturing | metal working, average for aluminium product manufacturing | Cutoff, S - RER	1.48333e-07	kg PO4 P-lim eq
		0	market for chlorothalonil | chlorothalonil | Cutoff, S - GLO	6.66667e-09	kg PO4 P-lim eq				0.0058		electronic component production, passive, unspecified | electronic component, passive, unspecified | Cutoff, S - GLO	2.21328e-07	kg PO4 P-lim eq				0.0018	market for polyethylene, high density, granulate | polyethylene, high density, granulate | Cutoff, S - GLO	8.375e-08	kg PO4 P-lim eq			0		market for polyethylene, high density, granulate | polyethylene, high density, granulate | Cutoff, S - GLO	8.375e-08	kg PO4 P-lim eq
		0	market for electricity, medium voltage | electricity, medium voltage | Cutoff, S - NO	9.24125e-10	kg PO4 P-lim eq				0.003		market for concrete, normal strength | concrete, normal strength | Cutoff, S - AT	1.14688e-07	kg PO4 P-lim eq				0.0012	concrete block production | concrete block | Cutoff, S - DE	5.72917e-08	kg PO4 P-lim eq				0.0009	concrete block production | concrete block | Cutoff, S - DE	5.72917e-08	kg PO4 P-lim eq
		0	market for tap water | tap water | Cutoff, S - Europe without Switzerland	6.98108e-10	kg PO4 P-lim eq				0.0015		metal working, average for aluminium product manufacturing | metal working, average for aluminium product manufacturing | Cutoff, S - RER	5.5625e-08	kg PO4 P-lim eq				0.0012	aluminium production, primary, ingot | aluminium, primary, ingot | Cutoff, S - IAI Area, EU27 & EFTA	5.64583e-08	kg PO4 P-lim eq				0.0009	aluminium production, primary, ingot | aluminium, primary, ingot | Cutoff, S - IAI Area, EU27 & EFTA	5.64583e-08	kg PO4 P-lim eq
	0.0493		Football Stadium: Infrastructure, Lights, Fence and Mowing edges	9.44292e-06	kg PO4 P-lim eq				0.0008		market for polyethylene, high density, granulate | polyethylene, high density, granulate | Cutoff, S - GLO	3.14063e-08	kg PO4 P-lim eq				0.0008	market for polypropylene, granulate | polypropylene, granulate | Cutoff, S - GLO	3.625e-08	kg PO4 P-lim eq				0.0006	market for polypropylene, granulate | polypropylene, granulate | Cutoff, S - GLO	3.625e-08	kg PO4 P-lim eq
		0.0248	market for steel, low-alloyed | steel, low-alloyed | Cutoff, S - GLO	4.76125e-06	kg PO4 P-lim eq				0.0006		concrete block production | concrete block | Cutoff, S - DE	2.14844e-08	kg PO4 P-lim eq				0.0006	diesel, burned in building machine | diesel, burned in building machine | Cutoff, S - GLO	2.64583e-08	kg PO4 P-lim eq				0.0004	diesel, burned in building machine | diesel, burned in building machine | Cutoff, S - GLO	2.64583e-08	kg PO4 P-lim eq
		0.0107	market for reinforcing steel | reinforcing steel | Cutoff, S - GLO	2.0425e-06	kg PO4 P-lim eq				0.0006		aluminium production, primary, ingot | aluminium, primary, ingot | Cutoff, S - IAI Area, EU27 & EFTA	2.11719e-08	kg PO4 P-lim eq				0.0003	market for extrusion, plastic pipes | extrusion, plastic pipes | Cutoff, S - GLO	1.52083e-08	kg PO4 P-lim eq				0.0002	market for extrusion, plastic pipes | extrusion, plastic pipes | Cutoff, S - GLO	1.52083e-08	kg PO4 P-lim eq
		0.0062	electronic component production, passive, unspecified | electronic component, passive, unspecified | Cutoff, S - GLO	1.18042e-06	kg PO4 P-lim eq				0.0004		market for polypropylene, granulate | polypropylene, granulate | Cutoff, S - GLO	1.35938e-08	kg PO4 P-lim eq			0.095		Renovation: Artificial Turf	4.39125e-06	kg PO4 P-lim eq				0	Renovation: Artificial Turf	4.39125e-06	kg PO4 P-lim eq
		0.0032	market for concrete, normal strength | concrete, normal strength | Cutoff, S - AT	6.11667e-07	kg PO4 P-lim eq				0.0003		diesel, burned in building machine | diesel, burned in building machine | Cutoff, S - GLO	9.92188e-09	kg PO4 P-lim eq				0.0556	treatment of waste plastic, mixture, municipal incineration | waste plastic, mixture | Cutoff, S - RoW	2.57104e-06	kg PO4 P-lim eq				0.0417	treatment of waste plastic, mixture, municipal incineration | waste plastic, mixture | Cutoff, S - RoW	2.57104e-06	kg PO4 P-lim eq
		0.0015	metal working, average for aluminium product manufacturing | metal working, average for aluminium product manufacturing | Cutoff, S - RER	2.96667e-07	kg PO4 P-lim eq				0.0001		market for extrusion, plastic pipes | extrusion, plastic pipes | Cutoff, S - GLO	5.70312e-09	kg PO4 P-lim eq				0.0185	polyethylene production, high density, granulate | polyethylene, high density, granulate | Cutoff, S - RER	8.54375e-07	kg PO4 P-lim eq				0.0139	polyethylene production, high density, granulate | polyethylene, high density, granulate | Cutoff, S - RER	8.54375e-07	kg PO4 P-lim eq
		0.0009	market for polyethylene, high density, granulate | polyethylene, high density, granulate | Cutoff, S - GLO	1.675e-07	kg PO4 P-lim eq			0.043			Renovation: Artificial Turf	1.64672e-06	kg PO4 P-lim eq				0.015	polypropylene production, granulate | polypropylene, granulate | Cutoff, S - RER	6.94375e-07	kg PO4 P-lim eq				0.0113	polypropylene production, granulate | polypropylene, granulate | Cutoff, S - RER	6.94375e-07	kg PO4 P-lim eq
		0.0006	concrete block production | concrete block | Cutoff, S - DE	1.14583e-07	kg PO4 P-lim eq				0.0252		treatment of waste plastic, mixture, municipal incineration | waste plastic, mixture | Cutoff, S - RoW	9.64141e-07	kg PO4 P-lim eq				0.0031	diesel, burned in building machine | diesel, burned in building machine | Cutoff, S - GLO	1.42708e-07	kg PO4 P-lim eq				0.0023	diesel, burned in building machine | diesel, burned in building machine | Cutoff, S - GLO	1.42708e-07	kg PO4 P-lim eq
		0.0006	aluminium production, primary, ingot | aluminium, primary, ingot | Cutoff, S - IAI Area, EU27 & EFTA	1.12917e-07	kg PO4 P-lim eq				0.0084		polyethylene production, high density, granulate | polyethylene, high density, granulate | Cutoff, S - RER	3.20391e-07	kg PO4 P-lim eq				0.0028	silica sand production | silica sand | Cutoff, S - RoW	1.2875e-07	kg PO4 P-lim eq				0.0021	silica sand production | silica sand | Cutoff, S - RoW	1.2875e-07	kg PO4 P-lim eq
		0.0004	market for polypropylene, granulate | polypropylene, granulate | Cutoff, S - GLO	7.25e-08	kg PO4 P-lim eq				0.0068		polypropylene production, granulate | polypropylene, granulate | Cutoff, S - RER	2.60391e-07	kg PO4 P-lim eq			0.0647		Football Stadium: Construction of Groundworks - Artificial Turf - NO	2.99167e-06	kg PO4 P-lim eq			0.0485		Football Stadium: Construction of Groundworks - Artificial Turf - NO	2.99167e-06	kg PO4 P-lim eq
		0.0003	diesel, burned in building machine | diesel, burned in building machine | Cutoff, S - GLO	5.29167e-08	kg PO4 P-lim eq				0.0014		diesel, burned in building machine | diesel, burned in building machine | Cutoff, S - GLO	5.35156e-08	kg PO4 P-lim eq				0.0486	treatment of biowaste by anaerobic digestion | biowaste | Cutoff, S - RoW	2.24854e-06	kg PO4 P-lim eq				0.0365	treatment of biowaste by anaerobic digestion | biowaste | Cutoff, S - RoW	2.24854e-06	kg PO4 P-lim eq
		0.0002	market for extrusion, plastic pipes | extrusion, plastic pipes | Cutoff, S - GLO	3.04167e-08	kg PO4 P-lim eq				0.0013		silica sand production | silica sand | Cutoff, S - RoW	4.82813e-08	kg PO4 P-lim eq				0.0106	market for quicklime, milled, packed | quicklime, milled, packed | Cutoff, S - RER	4.90625e-07	kg PO4 P-lim eq				0.008	market for quicklime, milled, packed | quicklime, milled, packed | Cutoff, S - RER	4.90625e-07	kg PO4 P-lim eq
	0.0255		Football Stadium: Construction of Groundworks - Natural Turf - NO	4.87792e-06	kg PO4 P-lim eq			0.0293	0		Football Stadium: Construction of Groundworks - Artificial Turf - NO	1.12187e-06	kg PO4 P-lim eq				0.0055	diesel, burned in building machine | diesel, burned in building machine | Cutoff, S - GLO	2.525e-07	kg PO4 P-lim eq				0.0041	diesel, burned in building machine | diesel, burned in building machine | Cutoff, S - GLO	2.525e-07	kg PO4 P-lim eq
		0.0235	treatment of biowaste by anaerobic digestion | biowaste | Cutoff, S - RoW	4.49708e-06	kg PO4 P-lim eq				0.022		treatment of biowaste by anaerobic digestion | biowaste | Cutoff, S - RoW	8.43203e-07	kg PO4 P-lim eq			0.0374		Demolition of a football pitch: Artificial Gras	1.73083e-06	kg PO4 P-lim eq			0.0281		Demolition of a football pitch: Artificial Gras	1.73083e-06	kg PO4 P-lim eq
		0.002	diesel, burned in building machine | diesel, burned in building machine | Cutoff, S - GLO	3.80833e-07	kg PO4 P-lim eq				0.0048		market for quicklime, milled, packed | quicklime, milled, packed | Cutoff, S - RER	1.83984e-07	kg PO4 P-lim eq				0.0164	market for waste polypropylene | waste polypropylene | Cutoff, S - NO	7.57083e-07	kg PO4 P-lim eq				0.0123	market for waste polypropylene | waste polypropylene | Cutoff, S - NO	7.57083e-07	kg PO4 P-lim eq
	0.0164		Renovation: Natural Turf	3.13875e-06	kg PO4 P-lim eq				0.0025		diesel, burned in building machine | diesel, burned in building machine | Cutoff, S - GLO	9.46875e-08	kg PO4 P-lim eq				0.014	treatment of waste asphalt, sanitary landfill | waste asphalt | Cutoff, S - RoW	6.49375e-07	kg PO4 P-lim eq				0.0105	treatment of waste asphalt, sanitary landfill | waste asphalt | Cutoff, S - RoW	6.49375e-07	kg PO4 P-lim eq
		0.0147	treatment of biowaste by anaerobic digestion | biowaste | Cutoff, S - RoW	2.81375e-06	kg PO4 P-lim eq			0.0169			Demolition of a football pitch: Artificial Gras	6.49062e-07	kg PO4 P-lim eq				0.0028	market for waste polyethylene | waste polyethylene | Cutoff, S - NO	1.31667e-07	kg PO4 P-lim eq				0.0021	market for waste polyethylene | waste polyethylene | Cutoff, S - NO	1.31667e-07	kg PO4 P-lim eq
		0.0014	Construction of natural gras	2.63333e-07	kg PO4 P-lim eq				0.0074		market for waste polypropylene | waste polypropylene | Cutoff, S - NO	2.83906e-07	kg PO4 P-lim eq				0.0025	diesel, burned in building machine | diesel, burned in building machine | Cutoff, S - GLO	1.16667e-07	kg PO4 P-lim eq				0.0019	diesel, burned in building machine | diesel, burned in building machine | Cutoff, S - GLO	1.16667e-07	kg PO4 P-lim eq
		0.0003	diesel, burned in building machine | diesel, burned in building machine | Cutoff, S - GLO	6.125e-08	kg PO4 P-lim eq				0.0064		treatment of waste asphalt, sanitary landfill | waste asphalt | Cutoff, S - RoW	2.43516e-07	kg PO4 P-lim eq				0.0012	market for waste concrete | waste concrete | Cutoff, S - Europe without Switzerland	5.375e-08	kg PO4 P-lim eq				0.0009	market for waste concrete | waste concrete | Cutoff, S - Europe without Switzerland	5.375e-08	kg PO4 P-lim eq
	0.0137		Construction of natural gras	2.635e-06	kg PO4 P-lim eq				0.0013		market for waste polyethylene | waste polyethylene | Cutoff, S - NO	4.9375e-08	kg PO4 P-lim eq				0.0005	market for waste reinforced concrete | waste reinforced concrete | Cutoff, S - Europe without Switzerland	2.10417e-08	kg PO4 P-lim eq				0.0003	market for waste reinforced concrete | waste reinforced concrete | Cutoff, S - Europe without Switzerland	2.10417e-08	kg PO4 P-lim eq
		0.0054	market for inorganic phosphorus fertiliser, as P2O5 | inorganic phosphorus fertiliser, as P2O5 | Cutoff, S - NO	1.03042e-06	kg PO4 P-lim eq				0.0011		diesel, burned in building machine | diesel, burned in building machine | Cutoff, S - GLO	4.375e-08	kg PO4 P-lim eq				0	market for scrap steel | scrap steel | Cutoff, S - Europe without Switzerland	1.42041e-09	kg PO4 P-lim eq			0		market for scrap steel | scrap steel | Cutoff, S - Europe without Switzerland	1.42041e-09	kg PO4 P-lim eq
		0.0045	market for grass seed, organic, for sowing | grass seed, organic, for sowing | Cutoff, S - GLO	8.55e-07	kg PO4 P-lim eq				0.0005		market for waste concrete | waste concrete | Cutoff, S - Europe without Switzerland	2.01562e-08	kg PO4 P-lim eq			0.0159		Football Stadium: Consturction of Piping System - NO	7.36042e-07	kg PO4 P-lim eq				0	Football Stadium: Consturction of Piping System - NO	7.36042e-07	kg PO4 P-lim eq
		0.0018	market for inorganic nitrogen fertiliser, as N | inorganic nitrogen fertiliser, as N | Cutoff, S - NO	3.40417e-07	kg PO4 P-lim eq				0.0002		market for waste reinforced concrete | waste reinforced concrete | Cutoff, S - Europe without Switzerland	7.89063e-09	kg PO4 P-lim eq				0.0078	market for gravel, round | gravel, round | Cutoff, S - RoW	3.58333e-07	kg PO4 P-lim eq				0.0058	market for gravel, round | gravel, round | Cutoff, S - RoW	3.58333e-07	kg PO4 P-lim eq
		0.001	market for inorganic potassium fertiliser, as K2O | inorganic potassium fertiliser, as K2O | Cutoff, S - NO	1.825e-07	kg PO4 P-lim eq				0		market for scrap steel | scrap steel | Cutoff, S - Europe without Switzerland	5.32652e-10	kg PO4 P-lim eq				0.0034	diesel, burned in building machine | diesel, burned in building machine | Cutoff, S - GLO	1.57708e-07	kg PO4 P-lim eq				0.0026	diesel, burned in building machine | diesel, burned in building machine | Cutoff, S - GLO	1.57708e-07	kg PO4 P-lim eq
		0.0006	diesel, burned in building machine | diesel, burned in building machine | Cutoff, S - GLO	1.22083e-07	kg PO4 P-lim eq			0.0072			Football Stadium: Consturction of Piping System - NO	2.76016e-07	kg PO4 P-lim eq				0.0022	market for polyethylene, high density, granulate | polyethylene, high density, granulate | Cutoff, S - GLO	1.00625e-07	kg PO4 P-lim eq				0.0016	market for polyethylene, high density, granulate | polyethylene, high density, granulate | Cutoff, S - GLO	1.00625e-07	kg PO4 P-lim eq
		0.0001	irrigation, sprinkler | irrigation | Cutoff, S - DE	1.16667e-08	kg PO4 P-lim eq				0.0035		market for gravel, round | gravel, round | Cutoff, S - RoW	1.34375e-07	kg PO4 P-lim eq				0.0019	market for polypropylene, granulate | polypropylene, granulate | Cutoff, S - GLO	8.70833e-08	kg PO4 P-lim eq				0.0014	market for polypropylene, granulate | polypropylene, granulate | Cutoff, S - GLO	8.70833e-08	kg PO4 P-lim eq
	0.0119		Demolition of a football pitch: Natural Gras	2.28667e-06	kg PO4 P-lim eq				0.0015		diesel, burned in building machine | diesel, burned in building machine | Cutoff, S - GLO	5.91406e-08	kg PO4 P-lim eq				0.0007	extrusion, plastic pipes | extrusion, plastic pipes | Cutoff, S - RER	3.02083e-08	kg PO4 P-lim eq				0.0005	extrusion, plastic pipes | extrusion, plastic pipes | Cutoff, S - RER	3.02083e-08	kg PO4 P-lim eq
		0.0045	treatment of inert waste, sanitary landfill | inert waste | Cutoff, S - Europe without Switzerland	8.6875e-07	kg PO4 P-lim eq				0.001		market for polyethylene, high density, granulate | polyethylene, high density, granulate | Cutoff, S - GLO	3.77344e-08	kg PO4 P-lim eq				0	market for concrete, normal strength | concrete, normal strength | Cutoff, S - RoW	1.82373e-09	kg PO4 P-lim eq				0	market for concrete, normal strength | concrete, normal strength | Cutoff, S - RoW	1.82373e-09	kg PO4 P-lim eq
		0.0034	market for waste concrete | waste concrete | Cutoff, S - Europe without Switzerland	6.5375e-07	kg PO4 P-lim eq				0.0009		market for polypropylene, granulate | polypropylene, granulate | Cutoff, S - GLO	3.26562e-08	kg PO4 P-lim eq			0.0141		Maintenance: Artificial Gras	6.51875e-07	kg PO4 P-lim eq			0.0106		Maintenance: Artificial Gras	6.51875e-07	kg PO4 P-lim eq
		0.0014	market for waste polyethylene | waste polyethylene | Cutoff, S - NO	2.63333e-07	kg PO4 P-lim eq				0.0003		extrusion, plastic pipes | extrusion, plastic pipes | Cutoff, S - RER	1.13281e-08	kg PO4 P-lim eq				0.0079	treatment of municipal solid waste, incineration | municipal solid waste | Cutoff, S - NO	3.64167e-07	kg PO4 P-lim eq				0.0059	treatment of municipal solid waste, incineration | municipal solid waste | Cutoff, S - NO	3.64167e-07	kg PO4 P-lim eq
		0.0012	diesel, burned in building machine | diesel, burned in building machine | Cutoff, S - GLO	2.33333e-07	kg PO4 P-lim eq				0		market for concrete, normal strength | concrete, normal strength | Cutoff, S - RoW	6.839e-10	kg PO4 P-lim eq				0.0035	diesel, burned in building machine | diesel, burned in building machine | Cutoff, S - GLO	1.61042e-07	kg PO4 P-lim eq				0.0026	diesel, burned in building machine | diesel, burned in building machine | Cutoff, S - GLO	1.61042e-07	kg PO4 P-lim eq
		0.0012	market for waste polypropylene | waste polypropylene | Cutoff, S - NO	2.225e-07	kg PO4 P-lim eq			0.0064			Maintenance: Artificial Gras	2.44453e-07	kg PO4 P-lim eq				0.0022	market for irrigation | irrigation | Cutoff, S - DE	1.00417e-07	kg PO4 P-lim eq				0.0016	market for irrigation | irrigation | Cutoff, S - DE	1.00417e-07	kg PO4 P-lim eq
		0.0002	market for waste reinforced concrete | waste reinforced concrete | Cutoff, S - Europe without Switzerland	4.20833e-08	kg PO4 P-lim eq				0.0036		treatment of municipal solid waste, incineration | municipal solid waste | Cutoff, S - NO	1.36562e-07	kg PO4 P-lim eq				0.0006	treatment of biowaste by anaerobic digestion | biowaste | Cutoff, S - RoW	2.60417e-08	kg PO4 P-lim eq				0.0004	treatment of biowaste by anaerobic digestion | biowaste | Cutoff, S - RoW	2.60417e-08	kg PO4 P-lim eq
		0	market for scrap steel | scrap steel | Cutoff, S - Europe without Switzerland	2.84081e-09	kg PO4 P-lim eq				0.0016		diesel, burned in building machine | diesel, burned in building machine | Cutoff, S - GLO	6.03906e-08	kg PO4 P-lim eq				0	market for electricity, medium voltage | electricity, medium voltage | Cutoff, S - NO	3.56306e-10	kg PO4 P-lim eq				0	market for electricity, medium voltage | electricity, medium voltage | Cutoff, S - NO	3.56306e-10	kg PO4 P-lim eq
	0.0108		Construction of the base layer - Football Pitch - Natural Turf	2.06375e-06	kg PO4 P-lim eq				0.001		market for irrigation | irrigation | Cutoff, S - DE	3.76562e-08	kg PO4 P-lim eq			0.0042		Construction of Artificial Gras	1.95417e-07	kg PO4 P-lim eq			0.0032		Construction of Artificial Gras	1.95417e-07	kg PO4 P-lim eq
		0.0098	market for silica sand | silica sand | Cutoff, S - GLO	1.885e-06	kg PO4 P-lim eq				0.0003		treatment of biowaste by anaerobic digestion | biowaste | Cutoff, S - RoW	9.76563e-09	kg PO4 P-lim eq				0.0019	market for silica sand | silica sand | Cutoff, S - GLO	8.75e-08	kg PO4 P-lim eq				0.0014	market for silica sand | silica sand | Cutoff, S - GLO	8.75e-08	kg PO4 P-lim eq
		0.0008	diesel, burned in building machine | diesel, burned in building machine | Cutoff, S - GLO	1.52917e-07	kg PO4 P-lim eq				0		market for electricity, medium voltage | electricity, medium voltage | Cutoff, S - NO	1.33615e-10	kg PO4 P-lim eq				0.0009	polyethylene production, high density, granulate | polyethylene, high density, granulate | Cutoff, S - RER	4.27083e-08	kg PO4 P-lim eq				0.0007	polyethylene production, high density, granulate | polyethylene, high density, granulate | Cutoff, S - RER	4.27083e-08	kg PO4 P-lim eq
		0.0001	limestone production, crushed, washed | limestone, crushed, washed | Cutoff, S - RoW	2.625e-08	kg PO4 P-lim eq			0.0019	0		Construction of Artificial Gras	7.32812e-08	kg PO4 P-lim eq				0.0008	polypropylene production, granulate | polypropylene, granulate | Cutoff, S - RER	3.47917e-08	kg PO4 P-lim eq				0.0006	polypropylene production, granulate | polypropylene, granulate | Cutoff, S - RER	3.47917e-08	kg PO4 P-lim eq
	0.0077		Football Stadium: Consturction of Piping System - NO	1.47208e-06	kg PO4 P-lim eq				0.0009		market for silica sand | silica sand | Cutoff, S - GLO	3.28125e-08	kg PO4 P-lim eq				0.0007	diesel, burned in building machine | diesel, burned in building machine | Cutoff, S - GLO	3.04167e-08	kg PO4 P-lim eq				0.0005	diesel, burned in building machine | diesel, burned in building machine | Cutoff, S - GLO	3.04167e-08	kg PO4 P-lim eq
		0.0037	market for gravel, round | gravel, round | Cutoff, S - RoW	7.16667e-07	kg PO4 P-lim eq
		0.0016	diesel, burned in building machine | diesel, burned in building machine | Cutoff, S - GLO	3.15417e-07	kg PO4 P-lim eq
		0.001	market for polyethylene, high density, granulate | polyethylene, high density, granulate | Cutoff, S - GLO	2.0125e-07	kg PO4 P-lim eq			0.9981
		0.0009	market for polypropylene, granulate | polypropylene, granulate | Cutoff, S - GLO	1.74167e-07	kg PO4 P-lim eq
		0.0003	extrusion, plastic pipes | extrusion, plastic pipes | Cutoff, S - RER	6.04167e-08	kg PO4 P-lim eq
		0	market for concrete, normal strength | concrete, normal strength | Cutoff, S - RoW	3.64747e-09	kg PO4 P-lim eq
	0.0052		Football Stadium: Construction of the Drainage Layer - NO	9.87083e-07	kg PO4 P-lim eq
		0.0044	market for sand | sand | Cutoff, S - RoW	8.44583e-07	kg PO4 P-lim eq
		0.0007	diesel, burned in building machine | diesel, burned in building machine | Cutoff, S - GLO	1.425e-07	kg PO4 P-lim eq

## Sheet: HumanToxicityCancer
Natural Gras							Wood-Based Infill							ELT - Base							EPDM - Base
Percentual Contribution			Process	Amount	Unit		Percentual Contribution			Process	Amount	Unit		Percentual Contribution			Process	Amount	Unit		Percentual Contribution			Process	Amount	Unit
1			Natural Gras - Benchmark	3.08125e-06	CTUh		1			GOE - Wood based infill	1.41542e-06	CTUh		1			Artificial Gras - ELT - Base Case	1.47938e-06	CTUh		1	0	0	Artificial Gras - EPDM - Base Case	2.34958e-06	CTUh
	0.444		Football Stadium: Infrastructure, Lights, Fence and Mowing edges	1.36792e-06	CTUh			0.4833	0	Football Stadium: Infrastructure, Lights, Fence and Mowing edges	6.83958e-07	CTUh			0.4624	0	Football Stadium: Infrastructure, Lights, Fence and Mowing edges	6.83958e-07	CTUh			0.4253	0	EPDM - Base Case	9.99167e-07	CTUh
		0.2323	market for steel, low-alloyed | steel, low-alloyed | Cutoff, S - GLO	7.15833e-07	CTUh			0	0.2528	market for steel, low-alloyed | steel, low-alloyed | Cutoff, S - GLO	3.57917e-07	CTUh			0	0.2419	market for steel, low-alloyed | steel, low-alloyed | Cutoff, S - GLO	3.57917e-07	CTUh			0	0.4134	synthetic rubber production | synthetic rubber | Cutoff, S - RER	9.7125e-07	CTUh
		0.1294	market for reinforcing steel | reinforcing steel | Cutoff, S - GLO	3.9875e-07	CTUh			0	0.1408	market for reinforcing steel | reinforcing steel | Cutoff, S - GLO	1.99375e-07	CTUh			0	0.1347	market for reinforcing steel | reinforcing steel | Cutoff, S - GLO	1.99375e-07	CTUh			0	0.0118	treatment of waste rubber, unspecified, municipal incineration | waste rubber, unspecified | Cutoff, S - Europe without Switzerland	2.77083e-08	CTUh
		0.0299	aluminium production, primary, ingot | aluminium, primary, ingot | Cutoff, S - IAI Area, EU27 & EFTA	9.20833e-08	CTUh			0	0.0326	aluminium production, primary, ingot | aluminium, primary, ingot | Cutoff, S - IAI Area, EU27 & EFTA	4.60417e-08	CTUh			0	0.0312	aluminium production, primary, ingot | aluminium, primary, ingot | Cutoff, S - IAI Area, EU27 & EFTA	4.60417e-08	CTUh			0.2911	0	Football Stadium: Infrastructure, Lights, Fence and Mowing edges	6.83958e-07	CTUh
		0.019	electronic component production, passive, unspecified | electronic component, passive, unspecified | Cutoff, S - GLO	5.875e-08	CTUh			0	0.0207	electronic component production, passive, unspecified | electronic component, passive, unspecified | Cutoff, S - GLO	2.9375e-08	CTUh			0	0.0198	electronic component production, passive, unspecified | electronic component, passive, unspecified | Cutoff, S - GLO	2.9375e-08	CTUh			0	0.1523	market for steel, low-alloyed | steel, low-alloyed | Cutoff, S - GLO	3.57917e-07	CTUh
		0.0172	market for concrete, normal strength | concrete, normal strength | Cutoff, S - AT	5.33333e-08	CTUh			0	0.0188	market for concrete, normal strength | concrete, normal strength | Cutoff, S - AT	2.66667e-08	CTUh			0	0.018	market for concrete, normal strength | concrete, normal strength | Cutoff, S - AT	2.66667e-08	CTUh			0	0.0848	market for reinforcing steel | reinforcing steel | Cutoff, S - GLO	1.99375e-07	CTUh
		0.0069	metal working, average for aluminium product manufacturing | metal working, average for aluminium product manufacturing | Cutoff, S - RER	2.125e-08	CTUh			0	0.0075	metal working, average for aluminium product manufacturing | metal working, average for aluminium product manufacturing | Cutoff, S - RER	1.0625e-08	CTUh			0	0.0072	metal working, average for aluminium product manufacturing | metal working, average for aluminium product manufacturing | Cutoff, S - RER	1.0625e-08	CTUh			0	0.0196	aluminium production, primary, ingot | aluminium, primary, ingot | Cutoff, S - IAI Area, EU27 & EFTA	4.60417e-08	CTUh
		0.0034	concrete block production | concrete block | Cutoff, S - DE	1.04167e-08	CTUh			0	0.0037	concrete block production | concrete block | Cutoff, S - DE	5.20833e-09	CTUh			0	0.0036	concrete block production | concrete block | Cutoff, S - DE	5.20833e-09	CTUh			0	0.0125	electronic component production, passive, unspecified | electronic component, passive, unspecified | Cutoff, S - GLO	2.9375e-08	CTUh
		0.0025	market for polyethylene, high density, granulate | polyethylene, high density, granulate | Cutoff, S - GLO	7.5e-09	CTUh			0	0.0027	market for polyethylene, high density, granulate | polyethylene, high density, granulate | Cutoff, S - GLO	3.75e-09	CTUh			0	0.0026	market for polyethylene, high density, granulate | polyethylene, high density, granulate | Cutoff, S - GLO	3.75e-09	CTUh			0	0.0113	market for concrete, normal strength | concrete, normal strength | Cutoff, S - AT	2.66667e-08	CTUh
		0.0013	diesel, burned in building machine | diesel, burned in building machine | Cutoff, S - GLO	3.89287e-09	CTUh			0	0.0014	diesel, burned in building machine | diesel, burned in building machine | Cutoff, S - GLO	1.94644e-09	CTUh			0	0.0013	diesel, burned in building machine | diesel, burned in building machine | Cutoff, S - GLO	1.94644e-09	CTUh			0	0.0045	metal working, average for aluminium product manufacturing | metal working, average for aluminium product manufacturing | Cutoff, S - RER	1.0625e-08	CTUh
		0.0011	market for extrusion, plastic pipes | extrusion, plastic pipes | Cutoff, S - GLO	3.23574e-09	CTUh			0	0.0011	market for extrusion, plastic pipes | extrusion, plastic pipes | Cutoff, S - GLO	1.61787e-09	CTUh			0	0.0011	market for extrusion, plastic pipes | extrusion, plastic pipes | Cutoff, S - GLO	1.61787e-09	CTUh			0	0.0022	concrete block production | concrete block | Cutoff, S - DE	5.20833e-09	CTUh
		0.001	market for polypropylene, granulate | polypropylene, granulate | Cutoff, S - GLO	3.18373e-09	CTUh			0	0.0011	market for polypropylene, granulate | polypropylene, granulate | Cutoff, S - GLO	1.59187e-09	CTUh			0	0.0011	market for polypropylene, granulate | polypropylene, granulate | Cutoff, S - GLO	1.59187e-09	CTUh			0	0.0016	market for polyethylene, high density, granulate | polyethylene, high density, granulate | Cutoff, S - GLO	3.75e-09	CTUh
	0.2502		Maintenance: Natural Gras	7.70833e-07	CTUh			0.2236	0	Construction of the base layer - Football Pitch - Artificial Turf	3.16458e-07	CTUh			0.2139	0	Construction of the base layer - Football Pitch - Artificial Turf	3.16458e-07	CTUh			0	0.0008	diesel, burned in building machine | diesel, burned in building machine | Cutoff, S - GLO	1.94644e-09	CTUh
		0.0462	market for inorganic nitrogen fertiliser, as N | inorganic nitrogen fertiliser, as N | Cutoff, S - NO	1.42083e-07	CTUh			0	0.1212	market for gravel, crushed | gravel, crushed | Cutoff, S - RoW	1.71667e-07	CTUh			0	0.116	market for gravel, crushed | gravel, crushed | Cutoff, S - RoW	1.71667e-07	CTUh			0	0.0007	market for extrusion, plastic pipes | extrusion, plastic pipes | Cutoff, S - GLO	1.61787e-09	CTUh
		0.0407	market for irrigation | irrigation | Cutoff, S - DE	1.25417e-07	CTUh			0	0.0898	mastic asphalt production | mastic asphalt | Cutoff, S - RoW	1.27083e-07	CTUh			0	0.0859	mastic asphalt production | mastic asphalt | Cutoff, S - RoW	1.27083e-07	CTUh			0	0.0007	market for polypropylene, granulate | polypropylene, granulate | Cutoff, S - GLO	1.59187e-09	CTUh
		0.0375	treatment of biowaste by anaerobic digestion | biowaste | Cutoff, S - RoW	1.15417e-07	CTUh			0	0.0058	diesel, burned in building machine | diesel, burned in building machine | Cutoff, S - GLO	8.33333e-09	CTUh			0	0.0056	diesel, burned in building machine | diesel, burned in building machine | Cutoff, S - GLO	8.33333e-09	CTUh			0.1347	0	Construction of the base layer - Football Pitch - Artificial Turf	3.16458e-07	CTUh
		0.0322	diesel, burned in building machine | diesel, burned in building machine | Cutoff, S - GLO	9.91667e-08	CTUh			0	0.0048	market for sand | sand | Cutoff, S - RoW	6.875e-09	CTUh			0	0.0046	market for sand | sand | Cutoff, S - RoW	6.875e-09	CTUh			0	0.073	market for gravel, crushed | gravel, crushed | Cutoff, S - RoW	1.71667e-07	CTUh
		0.0276	market for inorganic potassium fertiliser, as K2O | inorganic potassium fertiliser, as K2O | Cutoff, S - NO	8.5e-08	CTUh			0	0.0019	concrete block production | concrete block | Cutoff, S - RoW	2.70833e-09	CTUh			0	0.0018	concrete block production | concrete block | Cutoff, S - RoW	2.70833e-09	CTUh			0	0.0541	mastic asphalt production | mastic asphalt | Cutoff, S - RoW	1.27083e-07	CTUh
		0.0228	market for grass seed, organic, for sowing | grass seed, organic, for sowing | Cutoff, S - GLO	7.04167e-08	CTUh			0.0957	0	Renovation: Artificial Turf	1.35417e-07	CTUh			0.0915	0	Renovation: Artificial Turf	1.35417e-07	CTUh			0	0.0035	diesel, burned in building machine | diesel, burned in building machine | Cutoff, S - GLO	8.33333e-09	CTUh
		0.0161	market for sand | sand | Cutoff, S - CH	4.95833e-08	CTUh			0	0.029	treatment of waste plastic, mixture, municipal incineration | waste plastic, mixture | Cutoff, S - RoW	4.10417e-08	CTUh			0	0.0278	treatment of waste plastic, mixture, municipal incineration | waste plastic, mixture | Cutoff, S - RoW	4.10417e-08	CTUh			0	0.0029	market for sand | sand | Cutoff, S - RoW	6.875e-09	CTUh
		0.0072	market for inorganic phosphorus fertiliser, as P2O5 | inorganic phosphorus fertiliser, as P2O5 | Cutoff, S - NO	2.20833e-08	CTUh			0	0.0289	polyethylene production, high density, granulate | polyethylene, high density, granulate | Cutoff, S - RER	4.08333e-08	CTUh			0	0.0276	polyethylene production, high density, granulate | polyethylene, high density, granulate | Cutoff, S - RER	4.08333e-08	CTUh			0	0.0011	concrete block production | concrete block | Cutoff, S - RoW	2.70833e-09	CTUh
		0.0063	market for alkyd paint, white, without solvent, in 60% solution state | alkyd paint, white, without solvent, in 60% solution state | Cutoff, S - RER	1.91667e-08	CTUh			0	0.022	polypropylene production, granulate | polypropylene, granulate | Cutoff, S - RER	3.125e-08	CTUh			0	0.0211	polypropylene production, granulate | polypropylene, granulate | Cutoff, S - RER	3.125e-08	CTUh			0.0576	0	Renovation: Artificial Turf	1.35417e-07	CTUh
		0.0045	Construction of natural gras	1.41667e-08	CTUh			0	0.0083	silica sand production | silica sand | Cutoff, S - RoW	1.1875e-08	CTUh			0	0.008	silica sand production | silica sand | Cutoff, S - RoW	1.1875e-08	CTUh			0	0.0175	treatment of waste plastic, mixture, municipal incineration | waste plastic, mixture | Cutoff, S - RoW	4.10417e-08	CTUh
		0.0044	market for steel, low-alloyed, hot rolled | steel, low-alloyed, hot rolled | Cutoff, S - GLO	1.33333e-08	CTUh			0	0.0074	diesel, burned in building machine | diesel, burned in building machine | Cutoff, S - GLO	1.04167e-08	CTUh			0	0.0071	diesel, burned in building machine | diesel, burned in building machine | Cutoff, S - GLO	1.04167e-08	CTUh			0	0.0174	polyethylene production, high density, granulate | polyethylene, high density, granulate | Cutoff, S - RER	4.08333e-08	CTUh
		0.0033	treatment of municipal solid waste, incineration | municipal solid waste | Cutoff, S - NO	1e-08	CTUh			0.046	0	GoE - Wood-Based Infill	6.5e-08	CTUh			0.0872	0	ELT - Base Case	1.29167e-07	CTUh			0	0.0133	polypropylene production, granulate | polypropylene, granulate | Cutoff, S - RER	3.125e-08	CTUh
		0.0009	market for pesticide, unspecified | pesticide, unspecified | Cutoff, S - GLO	2.86004e-09	CTUh			0	0.034	Birch wood infill	4.8125e-08	CTUh			0	0.0676	Production of ELT	1e-07	CTUh			0	0.005	silica sand production | silica sand | Cutoff, S - RoW	1.1875e-08	CTUh
		0.0003	market for fosetyl-Al | fosetyl-Al | Cutoff, S - GLO	7.83421e-10	CTUh			0	0.012	treatment of waste wood, untreated, municipal incineration | waste wood, untreated | Cutoff, S - RoW	1.70833e-08	CTUh			0	0.0197	treatment of waste rubber, unspecified, municipal incineration | waste rubber, unspecified | Cutoff, S - Europe without Switzerland	2.91667e-08	CTUh			0	0.0045	diesel, burned in building machine | diesel, burned in building machine | Cutoff, S - GLO	1.04167e-08	CTUh
		0.0002	market for tap water | tap water | Cutoff, S - Europe without Switzerland	5.97683e-10	CTUh			0.0397	0	Football Stadium: Consturction of Piping System - NO	5.625e-08	CTUh			0.038	0	Football Stadium: Consturction of Piping System - NO	5.625e-08	CTUh			0.0239	0	Football Stadium: Consturction of Piping System - NO	5.625e-08	CTUh
		0.0001	market for chlorothalonil | chlorothalonil | Cutoff, S - GLO	2.48229e-10	CTUh			0	0.0238	market for gravel, round | gravel, round | Cutoff, S - RoW	3.375e-08	CTUh			0	0.0228	market for gravel, round | gravel, round | Cutoff, S - RoW	3.375e-08	CTUh			0	0.0144	market for gravel, round | gravel, round | Cutoff, S - RoW	3.375e-08	CTUh
		0	market for electricity, medium voltage | electricity, medium voltage | Cutoff, S - NO	1.16437e-10	CTUh			0	0.0082	diesel, burned in building machine | diesel, burned in building machine | Cutoff, S - GLO	1.16667e-08	CTUh			0	0.0078	diesel, burned in building machine | diesel, burned in building machine | Cutoff, S - GLO	1.16667e-08	CTUh			0	0.0049	diesel, burned in building machine | diesel, burned in building machine | Cutoff, S - GLO	1.16667e-08	CTUh
	0.1359		Demolition of a football pitch: Natural Gras	4.1875e-07	CTUh			0	0.0032	market for polyethylene, high density, granulate | polyethylene, high density, granulate | Cutoff, S - GLO	4.58333e-09	CTUh			0	0.0031	market for polyethylene, high density, granulate | polyethylene, high density, granulate | Cutoff, S - GLO	4.58333e-09	CTUh			0	0.0019	market for polyethylene, high density, granulate | polyethylene, high density, granulate | Cutoff, S - GLO	4.58333e-09	CTUh
		0.1133	treatment of inert waste, sanitary landfill | inert waste | Cutoff, S - Europe without Switzerland	3.49167e-07	CTUh			0	0.0027	market for polypropylene, granulate | polypropylene, granulate | Cutoff, S - GLO	3.75e-09	CTUh			0	0.0026	market for polypropylene, granulate | polypropylene, granulate | Cutoff, S - GLO	3.75e-09	CTUh			0	0.0016	market for polypropylene, granulate | polypropylene, granulate | Cutoff, S - GLO	3.75e-09	CTUh
		0.0145	market for waste concrete | waste concrete | Cutoff, S - Europe without Switzerland	4.45833e-08	CTUh			0	0.0017	extrusion, plastic pipes | extrusion, plastic pipes | Cutoff, S - RER	2.29167e-09	CTUh			0	0.0016	extrusion, plastic pipes | extrusion, plastic pipes | Cutoff, S - RER	2.29167e-09	CTUh			0	0.001	extrusion, plastic pipes | extrusion, plastic pipes | Cutoff, S - RER	2.29167e-09	CTUh
		0.0056	diesel, burned in building machine | diesel, burned in building machine | Cutoff, S - GLO	1.70833e-08	CTUh			0	0.0001	market for concrete, normal strength | concrete, normal strength | Cutoff, S - RoW	1.62619e-10	CTUh			0	0.0001	market for concrete, normal strength | concrete, normal strength | Cutoff, S - RoW	1.62619e-10	CTUh			0	0.0001	market for concrete, normal strength | concrete, normal strength | Cutoff, S - RoW	1.62619e-10	CTUh
		0.0016	market for waste reinforced concrete | waste reinforced concrete | Cutoff, S - Europe without Switzerland	5e-09	CTUh			0.0369	0	Football Stadium: Construction of Groundworks - Artificial Turf - NO	5.22917e-08	CTUh			0.0353	0	Football Stadium: Construction of Groundworks - Artificial Turf - NO	5.22917e-08	CTUh			0.0222	0	Football Stadium: Construction of Groundworks - Artificial Turf - NO	5.22917e-08	CTUh
		0.0004	market for waste polyethylene | waste polyethylene | Cutoff, S - NO	1.26807e-09	CTUh			0	0.0178	treatment of biowaste by anaerobic digestion | biowaste | Cutoff, S - RoW	2.52083e-08	CTUh			0	0.0171	treatment of biowaste by anaerobic digestion | biowaste | Cutoff, S - RoW	2.52083e-08	CTUh			0	0.0107	treatment of biowaste by anaerobic digestion | biowaste | Cutoff, S - RoW	2.52083e-08	CTUh
		0.0004	market for waste polypropylene | waste polypropylene | Cutoff, S - NO	1.10844e-09	CTUh			0	0.0131	diesel, burned in building machine | diesel, burned in building machine | Cutoff, S - GLO	1.85417e-08	CTUh			0	0.0125	diesel, burned in building machine | diesel, burned in building machine | Cutoff, S - GLO	1.85417e-08	CTUh			0	0.0079	diesel, burned in building machine | diesel, burned in building machine | Cutoff, S - GLO	1.85417e-08	CTUh
		0.0002	market for scrap steel | scrap steel | Cutoff, S - Europe without Switzerland	5.39462e-10	CTUh			0	0.0059	market for quicklime, milled, packed | quicklime, milled, packed | Cutoff, S - RER	8.33333e-09	CTUh			0	0.0057	market for quicklime, milled, packed | quicklime, milled, packed | Cutoff, S - RER	8.33333e-09	CTUh			0	0.0036	market for quicklime, milled, packed | quicklime, milled, packed | Cutoff, S - RER	8.33333e-09	CTUh
	0.0584		Construction of the base layer - Football Pitch - Natural Turf	1.8e-07	CTUh			0.036	0	Demolition of a football pitch: Artificial Gras	5.08333e-08	CTUh			0.0344	0	Demolition of a football pitch: Artificial Gras	5.08333e-08	CTUh			0.0217	0	Demolition of a football pitch: Artificial Gras	5.08333e-08	CTUh
		0.0542	market for silica sand | silica sand | Cutoff, S - GLO	1.67083e-07	CTUh			0	0.0223	treatment of waste asphalt, sanitary landfill | waste asphalt | Cutoff, S - RoW	3.14583e-08	CTUh			0	0.0213	treatment of waste asphalt, sanitary landfill | waste asphalt | Cutoff, S - RoW	3.14583e-08	CTUh			0	0.0134	treatment of waste asphalt, sanitary landfill | waste asphalt | Cutoff, S - RoW	3.14583e-08	CTUh
		0.0036	diesel, burned in building machine | diesel, burned in building machine | Cutoff, S - GLO	1.125e-08	CTUh			0	0.0061	diesel, burned in building machine | diesel, burned in building machine | Cutoff, S - GLO	8.54167e-09	CTUh			0	0.0058	diesel, burned in building machine | diesel, burned in building machine | Cutoff, S - GLO	8.54167e-09	CTUh			0	0.0036	diesel, burned in building machine | diesel, burned in building machine | Cutoff, S - GLO	8.54167e-09	CTUh
		0.0006	limestone production, crushed, washed | limestone, crushed, washed | Cutoff, S - RoW	1.83174e-09	CTUh			0	0.0027	market for waste polypropylene | waste polypropylene | Cutoff, S - NO	3.75e-09	CTUh			0	0.0025	market for waste polypropylene | waste polypropylene | Cutoff, S - NO	3.75e-09	CTUh			0	0.0016	market for waste polypropylene | waste polypropylene | Cutoff, S - NO	3.75e-09	CTUh
	0.0365		Football Stadium: Consturction of Piping System - NO	1.125e-07	CTUh			0	0.0026	market for waste concrete | waste concrete | Cutoff, S - Europe without Switzerland	3.75e-09	CTUh			0	0.0025	market for waste concrete | waste concrete | Cutoff, S - Europe without Switzerland	3.75e-09	CTUh			0	0.0016	market for waste concrete | waste concrete | Cutoff, S - Europe without Switzerland	3.75e-09	CTUh
		0.0219	market for gravel, round | gravel, round | Cutoff, S - RoW	6.75e-08	CTUh			0	0.0017	market for waste reinforced concrete | waste reinforced concrete | Cutoff, S - Europe without Switzerland	2.5e-09	CTUh			0	0.0016	market for waste reinforced concrete | waste reinforced concrete | Cutoff, S - Europe without Switzerland	2.5e-09	CTUh			0	0.001	market for waste reinforced concrete | waste reinforced concrete | Cutoff, S - Europe without Switzerland	2.5e-09	CTUh
		0.0075	diesel, burned in building machine | diesel, burned in building machine | Cutoff, S - GLO	2.33333e-08	CTUh			0	0.0004	market for waste polyethylene | waste polyethylene | Cutoff, S - NO	6.34033e-10	CTUh			0	0.0004	market for waste polyethylene | waste polyethylene | Cutoff, S - NO	6.34033e-10	CTUh			0	0.0003	market for waste polyethylene | waste polyethylene | Cutoff, S - NO	6.34033e-10	CTUh
		0.0029	market for polyethylene, high density, granulate | polyethylene, high density, granulate | Cutoff, S - GLO	9.16667e-09	CTUh			0	0.0002	market for scrap steel | scrap steel | Cutoff, S - Europe without Switzerland	2.69731e-10	CTUh			0	0.0002	market for scrap steel | scrap steel | Cutoff, S - Europe without Switzerland	2.69731e-10	CTUh			0	0.0001	market for scrap steel | scrap steel | Cutoff, S - Europe without Switzerland	2.69731e-10	CTUh
		0.0025	market for polypropylene, granulate | polypropylene, granulate | Cutoff, S - GLO	7.5e-09	CTUh			0.0294	0	Maintenance: Artificial Gras	4.16667e-08	CTUh			0.0281	0	Maintenance: Artificial Gras	4.16667e-08	CTUh			0.0177	0	Maintenance: Artificial Gras	4.16667e-08	CTUh
		0.0015	extrusion, plastic pipes | extrusion, plastic pipes | Cutoff, S - RER	4.58333e-09	CTUh			0	0.0141	market for irrigation | irrigation | Cutoff, S - DE	2e-08	CTUh			0	0.0135	market for irrigation | irrigation | Cutoff, S - DE	2e-08	CTUh			0	0.0085	market for irrigation | irrigation | Cutoff, S - DE	2e-08	CTUh
		0.0001	market for concrete, normal strength | concrete, normal strength | Cutoff, S - RoW	3.25238e-10	CTUh			0	0.0083	diesel, burned in building machine | diesel, burned in building machine | Cutoff, S - GLO	1.1875e-08	CTUh			0	0.008	diesel, burned in building machine | diesel, burned in building machine | Cutoff, S - GLO	1.1875e-08	CTUh			0	0.005	diesel, burned in building machine | diesel, burned in building machine | Cutoff, S - GLO	1.1875e-08	CTUh
	0.0289		Football Stadium: Construction of the Drainage Layer - NO	8.91667e-08	CTUh			0	0.0067	treatment of municipal solid waste, incineration | municipal solid waste | Cutoff, S - NO	9.58333e-09	CTUh			0	0.0064	treatment of municipal solid waste, incineration | municipal solid waste | Cutoff, S - NO	9.58333e-09	CTUh			0	0.004	treatment of municipal solid waste, incineration | municipal solid waste | Cutoff, S - NO	9.58333e-09	CTUh
		0.0255	market for sand | sand | Cutoff, S - RoW	7.875e-08	CTUh			0	0.0002	treatment of biowaste by anaerobic digestion | biowaste | Cutoff, S - RoW	2.921e-10	CTUh			0	0.0002	treatment of biowaste by anaerobic digestion | biowaste | Cutoff, S - RoW	2.921e-10	CTUh			0	0.0001	treatment of biowaste by anaerobic digestion | biowaste | Cutoff, S - RoW	2.921e-10	CTUh
		0.0034	diesel, burned in building machine | diesel, burned in building machine | Cutoff, S - GLO	1.04167e-08	CTUh			0	0	market for electricity, medium voltage | electricity, medium voltage | Cutoff, S - NO	4.4894e-11	CTUh			0	0	market for electricity, medium voltage | electricity, medium voltage | Cutoff, S - NO	4.4894e-11	CTUh			0	0	market for electricity, medium voltage | electricity, medium voltage | Cutoff, S - NO	4.4894e-11	CTUh
	0.0255		Football Stadium: Construction of Groundworks - Natural Turf - NO	7.83333e-08	CTUh			0.0096	0	Construction of Artificial Gras	1.35417e-08	CTUh			0.0092	0	Construction of Artificial Gras	1.35417e-08	CTUh			0.0058	0	Construction of Artificial Gras	1.35417e-08	CTUh
		0.0164	treatment of biowaste by anaerobic digestion | biowaste | Cutoff, S - RoW	5.04167e-08	CTUh			0	0.0055	market for silica sand | silica sand | Cutoff, S - GLO	7.70833e-09	CTUh			0	0.0052	market for silica sand | silica sand | Cutoff, S - GLO	7.70833e-09	CTUh			0	0.0033	market for silica sand | silica sand | Cutoff, S - GLO	7.70833e-09	CTUh
		0.0091	diesel, burned in building machine | diesel, burned in building machine | Cutoff, S - GLO	2.79167e-08	CTUh			0	0.0016	diesel, burned in building machine | diesel, burned in building machine | Cutoff, S - GLO	2.29167e-09	CTUh			0	0.0015	diesel, burned in building machine | diesel, burned in building machine | Cutoff, S - GLO	2.29167e-09	CTUh			0	0.001	diesel, burned in building machine | diesel, burned in building machine | Cutoff, S - GLO	2.29167e-09	CTUh
	0.0125		Renovation: Natural Turf	3.875e-08	CTUh			0	0.0014	polyethylene production, high density, granulate | polyethylene, high density, granulate | Cutoff, S - RER	2.04191e-09	CTUh			0	0.0014	polyethylene production, high density, granulate | polyethylene, high density, granulate | Cutoff, S - RER	2.04191e-09	CTUh			0	0.0009	polyethylene production, high density, granulate | polyethylene, high density, granulate | Cutoff, S - RER	2.04191e-09	CTUh
		0.0103	treatment of biowaste by anaerobic digestion | biowaste | Cutoff, S - RoW	3.16667e-08	CTUh			0	0.0011	polypropylene production, granulate | polypropylene, granulate | Cutoff, S - RER	1.55977e-09	CTUh			0	0.0011	polypropylene production, granulate | polypropylene, granulate | Cutoff, S - RER	1.55977e-09	CTUh			0	0.0007	polypropylene production, granulate | polypropylene, granulate | Cutoff, S - RER	1.55977e-09	CTUh
		0.0015	diesel, burned in building machine | diesel, burned in building machine | Cutoff, S - GLO	4.58333e-09	CTUh
		0.0008	Construction of natural gras	2.50316e-09	CTUh
	0.0081		Construction of natural gras	2.5e-08	CTUh
		0.0029	diesel, burned in building machine | diesel, burned in building machine | Cutoff, S - GLO	9.16667e-09	CTUh
		0.0024	market for inorganic phosphorus fertiliser, as P2O5 | inorganic phosphorus fertiliser, as P2O5 | Cutoff, S - NO	7.5e-09	CTUh
		0.001	market for inorganic nitrogen fertiliser, as N | inorganic nitrogen fertiliser, as N | Cutoff, S - NO	3.16151e-09	CTUh
		0.0009	irrigation, sprinkler | irrigation | Cutoff, S - DE	2.8427e-09	CTUh
		0.0005	market for inorganic potassium fertiliser, as K2O | inorganic potassium fertiliser, as K2O | Cutoff, S - NO	1.41818e-09	CTUh
		0.0004	market for grass seed, organic, for sowing | grass seed, organic, for sowing | Cutoff, S - GLO	1.23527e-09	CTUh

## Sheet: HumanToxicityNonCancer
Natural Gras							Wood-Based Infill							ELT - Base							EPDM - Base
Percentual Contribution			Process	Amount	Unit		Percentual Contribution			Process	Amount	Unit		Percentual Contribution			Process	Amount	Unit		Percentual Contribution			Process	Amount	Unit
1			Natural Gras - Benchmark	1.09396e-05	CTUh		1			GOE - Wood based infill	1.43104e-06	CTUh		1			Artificial Gras - ELT - Base Case	1.71417e-06	CTUh		1			Artificial Gras - EPDM - Base Case	3.34854e-06	CTUh
	0.5815	0	Demolition of a football pitch: Natural Gras	6.36125e-06	CTUh			0.2978		Construction of the base layer - Football Pitch - Artificial Turf	4.2625e-07	CTUh			0.2486		Construction of the base layer - Football Pitch - Artificial Turf	4.2625e-07	CTUh			0.6111		EPDM - Base Case	2.04625e-06	CTUh
	0	0.571	treatment of inert waste, sanitary landfill | inert waste | Cutoff, S - Europe without Switzerland	6.24625e-06	CTUh				0.1712	mastic asphalt production | mastic asphalt | Cutoff, S - RoW	2.45e-07	CTUh				0.1429	mastic asphalt production | mastic asphalt | Cutoff, S - RoW	2.45e-07	CTUh				0.5584	synthetic rubber production | synthetic rubber | Cutoff, S - RER	1.87e-06	CTUh
	0	0.004	market for waste concrete | waste concrete | Cutoff, S - Europe without Switzerland	4.33333e-08	CTUh				0.1168	market for gravel, crushed | gravel, crushed | Cutoff, S - RoW	1.67292e-07	CTUh				0.0975	market for gravel, crushed | gravel, crushed | Cutoff, S - RoW	1.67292e-07	CTUh				0.0527	treatment of waste rubber, unspecified, municipal incineration | waste rubber, unspecified | Cutoff, S - Europe without Switzerland	1.76458e-07	CTUh
	0	0.0027	market for waste reinforced concrete | waste reinforced concrete | Cutoff, S - Europe without Switzerland	2.91667e-08	CTUh				0.0048	market for sand | sand | Cutoff, S - RoW	6.875e-09	CTUh				0.004	market for sand | sand | Cutoff, S - RoW	6.875e-09	CTUh			0.1273		Construction of the base layer - Football Pitch - Artificial Turf	4.2625e-07	CTUh
	0	0.0017	market for waste polyethylene | waste polyethylene | Cutoff, S - NO	1.875e-08	CTUh				0.0028	diesel, burned in building machine | diesel, burned in building machine | Cutoff, S - GLO	3.95833e-09	CTUh				0.0023	diesel, burned in building machine | diesel, burned in building machine | Cutoff, S - GLO	3.95833e-09	CTUh				0.0732	mastic asphalt production | mastic asphalt | Cutoff, S - RoW	2.45e-07	CTUh
	0	0.0014	market for waste polypropylene | waste polypropylene | Cutoff, S - NO	1.58333e-08	CTUh				0.0022	concrete block production | concrete block | Cutoff, S - RoW	3.125e-09	CTUh				0.0018	concrete block production | concrete block | Cutoff, S - RoW	3.125e-09	CTUh				0.0499	market for gravel, crushed | gravel, crushed | Cutoff, S - RoW	1.67292e-07	CTUh
	0	0.0007	diesel, burned in building machine | diesel, burned in building machine | Cutoff, S - GLO	8.33333e-09	CTUh			0.212		Football Stadium: Infrastructure, Lights, Fence and Mowing edges	3.03333e-07	CTUh			0.2404		ELT - Base Case	4.12083e-07	CTUh				0.0021	market for sand | sand | Cutoff, S - RoW	6.875e-09	CTUh
	0	0	market for scrap steel | scrap steel | Cutoff, S - Europe without Switzerland	2.86813e-10	CTUh				0.0665	electronic component production, passive, unspecified | electronic component, passive, unspecified | Cutoff, S - GLO	9.52083e-08	CTUh				0.1326	Production of ELT	2.27292e-07	CTUh				0.0012	diesel, burned in building machine | diesel, burned in building machine | Cutoff, S - GLO	3.95833e-09	CTUh
	0.302	0	Maintenance: Natural Gras	3.30375e-06	CTUh				0.0387	market for concrete, normal strength | concrete, normal strength | Cutoff, S - AT	5.54167e-08	CTUh				0.1078	treatment of waste rubber, unspecified, municipal incineration | waste rubber, unspecified | Cutoff, S - Europe without Switzerland	1.84792e-07	CTUh				0.0009	concrete block production | concrete block | Cutoff, S - RoW	3.125e-09	CTUh
	0	0.2061	market for grass seed, organic, for sowing | grass seed, organic, for sowing | Cutoff, S - GLO	2.25417e-06	CTUh				0.0384	market for steel, low-alloyed | steel, low-alloyed | Cutoff, S - GLO	5.5e-08	CTUh				0	Football Stadium: Infrastructure, Lights, Fence and Mowing edges	3.03333e-07	CTUh				0	Football Stadium: Infrastructure, Lights, Fence and Mowing edges	3.03333e-07	CTUh
	0	0.0244	market for inorganic nitrogen fertiliser, as N | inorganic nitrogen fertiliser, as N | Cutoff, S - NO	2.67083e-07	CTUh				0.0248	aluminium production, primary, ingot | aluminium, primary, ingot | Cutoff, S - IAI Area, EU27 & EFTA	3.54167e-08	CTUh				0.0555	electronic component production, passive, unspecified | electronic component, passive, unspecified | Cutoff, S - GLO	9.52083e-08	CTUh				0.0284	electronic component production, passive, unspecified | electronic component, passive, unspecified | Cutoff, S - GLO	9.52083e-08	CTUh
	0	0.0221	market for irrigation | irrigation | Cutoff, S - DE	2.4125e-07	CTUh				0.0237	market for reinforcing steel | reinforcing steel | Cutoff, S - GLO	3.39583e-08	CTUh				0.0323	market for concrete, normal strength | concrete, normal strength | Cutoff, S - AT	5.54167e-08	CTUh				0.0165	market for concrete, normal strength | concrete, normal strength | Cutoff, S - AT	5.54167e-08	CTUh
	0	0.0146	market for inorganic potassium fertiliser, as K2O | inorganic potassium fertiliser, as K2O | Cutoff, S - NO	1.59583e-07	CTUh				0.008	metal working, average for aluminium product manufacturing | metal working, average for aluminium product manufacturing | Cutoff, S - RER	1.14583e-08	CTUh				0.0321	market for steel, low-alloyed | steel, low-alloyed | Cutoff, S - GLO	5.5e-08	CTUh				0.0164	market for steel, low-alloyed | steel, low-alloyed | Cutoff, S - GLO	5.5e-08	CTUh
	0	0.0126	treatment of biowaste by anaerobic digestion | biowaste | Cutoff, S - RoW	1.38333e-07	CTUh				0.0043	concrete block production | concrete block | Cutoff, S - DE	6.25e-09	CTUh				0.0207	aluminium production, primary, ingot | aluminium, primary, ingot | Cutoff, S - IAI Area, EU27 & EFTA	3.54167e-08	CTUh				0.0106	aluminium production, primary, ingot | aluminium, primary, ingot | Cutoff, S - IAI Area, EU27 & EFTA	3.54167e-08	CTUh
	0	0.0043	diesel, burned in building machine | diesel, burned in building machine | Cutoff, S - GLO	4.70833e-08	CTUh				0.0036	market for polyethylene, high density, granulate | polyethylene, high density, granulate | Cutoff, S - GLO	5e-09	CTUh				0.0198	market for reinforcing steel | reinforcing steel | Cutoff, S - GLO	3.39583e-08	CTUh				0.0101	market for reinforcing steel | reinforcing steel | Cutoff, S - GLO	3.39583e-08	CTUh
	0	0.0038	market for inorganic phosphorus fertiliser, as P2O5 | inorganic phosphorus fertiliser, as P2O5 | Cutoff, S - NO	4.16667e-08	CTUh				0.0017	market for polypropylene, granulate | polypropylene, granulate | Cutoff, S - GLO	2.5e-09	CTUh				0.0067	metal working, average for aluminium product manufacturing | metal working, average for aluminium product manufacturing | Cutoff, S - RER	1.14583e-08	CTUh				0.0034	metal working, average for aluminium product manufacturing | metal working, average for aluminium product manufacturing | Cutoff, S - RER	1.14583e-08	CTUh
	0	0.0037	market for alkyd paint, white, without solvent, in 60% solution state | alkyd paint, white, without solvent, in 60% solution state | Cutoff, S - RER	4.04167e-08	CTUh				0.0017	market for extrusion, plastic pipes | extrusion, plastic pipes | Cutoff, S - GLO	2.5e-09	CTUh				0.0036	concrete block production | concrete block | Cutoff, S - DE	6.25e-09	CTUh				0.0018	concrete block production | concrete block | Cutoff, S - DE	6.25e-09	CTUh
	0	0.0036	Construction of natural gras	4e-08	CTUh				0.0006	diesel, burned in building machine | diesel, burned in building machine | Cutoff, S - GLO	9.28125e-10	CTUh				0.003	market for polyethylene, high density, granulate | polyethylene, high density, granulate | Cutoff, S - GLO	5e-09	CTUh				0.0015	market for polyethylene, high density, granulate | polyethylene, high density, granulate | Cutoff, S - GLO	5e-09	CTUh
	0	0.0035	market for sand | sand | Cutoff, S - CH	3.875e-08	CTUh			0.1743		Renovation: Artificial Turf	2.49375e-07	CTUh				0.0014	market for polypropylene, granulate | polypropylene, granulate | Cutoff, S - GLO	2.5e-09	CTUh				0.0007	market for polypropylene, granulate | polypropylene, granulate | Cutoff, S - GLO	2.5e-09	CTUh
	0	0.0023	treatment of municipal solid waste, incineration | municipal solid waste | Cutoff, S - NO	2.5e-08	CTUh				0.0913	treatment of waste plastic, mixture, municipal incineration | waste plastic, mixture | Cutoff, S - RoW	1.30625e-07	CTUh				0.0014	market for extrusion, plastic pipes | extrusion, plastic pipes | Cutoff, S - GLO	2.5e-09	CTUh				0.0007	market for extrusion, plastic pipes | extrusion, plastic pipes | Cutoff, S - GLO	2.5e-09	CTUh
	0	0.0006	market for pesticide, unspecified | pesticide, unspecified | Cutoff, S - GLO	6.66667e-09	CTUh				0.034	polyethylene production, high density, granulate | polyethylene, high density, granulate | Cutoff, S - RER	4.85417e-08	CTUh				0.0005	diesel, burned in building machine | diesel, burned in building machine | Cutoff, S - GLO	9.28125e-10	CTUh				0.0003	diesel, burned in building machine | diesel, burned in building machine | Cutoff, S - GLO	9.28125e-10	CTUh
	0	0.0002	market for steel, low-alloyed, hot rolled | steel, low-alloyed, hot rolled | Cutoff, S - GLO	2.06669e-09	CTUh				0.031	polypropylene production, granulate | polypropylene, granulate | Cutoff, S - RER	4.4375e-08	CTUh			0.1455		Renovation: Artificial Turf	2.49375e-07	CTUh			0.0745		Renovation: Artificial Turf	2.49375e-07	CTUh
	0	0.0001	market for fosetyl-Al | fosetyl-Al | Cutoff, S - GLO	1.10066e-09	CTUh				0.0146	silica sand production | silica sand | Cutoff, S - RoW	2.08333e-08	CTUh				0.0762	treatment of waste plastic, mixture, municipal incineration | waste plastic, mixture | Cutoff, S - RoW	1.30625e-07	CTUh				0.039	treatment of waste plastic, mixture, municipal incineration | waste plastic, mixture | Cutoff, S - RoW	1.30625e-07	CTUh
	0	0.0001	market for chlorothalonil | chlorothalonil | Cutoff, S - GLO	5.62488e-10	CTUh				0.0035	diesel, burned in building machine | diesel, burned in building machine | Cutoff, S - GLO	5e-09	CTUh				0.0284	polyethylene production, high density, granulate | polyethylene, high density, granulate | Cutoff, S - RER	4.85417e-08	CTUh				0.0145	polyethylene production, high density, granulate | polyethylene, high density, granulate | Cutoff, S - RER	4.85417e-08	CTUh
	0	0	market for tap water | tap water | Cutoff, S - Europe without Switzerland	3.4482e-10	CTUh			0.0916		Demolition of a football pitch: Artificial Gras	1.31042e-07	CTUh				0.0258	polypropylene production, granulate | polypropylene, granulate | Cutoff, S - RER	4.4375e-08	CTUh				0.0132	polypropylene production, granulate | polypropylene, granulate | Cutoff, S - RER	4.4375e-08	CTUh
	0	0	market for electricity, medium voltage | electricity, medium voltage | Cutoff, S - NO	1.9854e-10	CTUh				0.0374	market for waste polypropylene | waste polypropylene | Cutoff, S - NO	5.35417e-08	CTUh				0.0122	silica sand production | silica sand | Cutoff, S - RoW	2.08333e-08	CTUh				0.0062	silica sand production | silica sand | Cutoff, S - RoW	2.08333e-08	CTUh
	0.0555	0	Football Stadium: Infrastructure, Lights, Fence and Mowing edges	6.06667e-07	CTUh				0.0322	treatment of waste asphalt, sanitary landfill | waste asphalt | Cutoff, S - RoW	4.60417e-08	CTUh				0.0029	diesel, burned in building machine | diesel, burned in building machine | Cutoff, S - GLO	5e-09	CTUh				0.0015	diesel, burned in building machine | diesel, burned in building machine | Cutoff, S - GLO	5e-09	CTUh
	0	0.0174	electronic component production, passive, unspecified | electronic component, passive, unspecified | Cutoff, S - GLO	1.90417e-07	CTUh				0.0102	market for waste reinforced concrete | waste reinforced concrete | Cutoff, S - Europe without Switzerland	1.45833e-08	CTUh			0.0765		Demolition of a football pitch: Artificial Gras	1.31042e-07	CTUh			0.0392		Demolition of a football pitch: Artificial Gras	1.31042e-07	CTUh
	0	0.0101	market for concrete, normal strength | concrete, normal strength | Cutoff, S - AT	1.10833e-07	CTUh				0.0065	market for waste polyethylene | waste polyethylene | Cutoff, S - NO	9.375e-09	CTUh				0.0312	market for waste polypropylene | waste polypropylene | Cutoff, S - NO	5.35417e-08	CTUh				0.016	market for waste polypropylene | waste polypropylene | Cutoff, S - NO	5.35417e-08	CTUh
	0	0.01	market for steel, low-alloyed | steel, low-alloyed | Cutoff, S - GLO	1.1e-07	CTUh				0.0029	diesel, burned in building machine | diesel, burned in building machine | Cutoff, S - GLO	4.16667e-09	CTUh				0.0268	treatment of waste asphalt, sanitary landfill | waste asphalt | Cutoff, S - RoW	4.60417e-08	CTUh				0.0137	treatment of waste asphalt, sanitary landfill | waste asphalt | Cutoff, S - RoW	4.60417e-08	CTUh
	0	0.0065	aluminium production, primary, ingot | aluminium, primary, ingot | Cutoff, S - IAI Area, EU27 & EFTA	7.08333e-08	CTUh				0.0025	market for waste concrete | waste concrete | Cutoff, S - Europe without Switzerland	3.54167e-09	CTUh				0.0085	market for waste reinforced concrete | waste reinforced concrete | Cutoff, S - Europe without Switzerland	1.45833e-08	CTUh				0.0043	market for waste reinforced concrete | waste reinforced concrete | Cutoff, S - Europe without Switzerland	1.45833e-08	CTUh
	0	0.0062	market for reinforcing steel | reinforcing steel | Cutoff, S - GLO	6.79167e-08	CTUh				0.0001	market for scrap steel | scrap steel | Cutoff, S - Europe without Switzerland	1.43406e-10	CTUh				0.0054	market for waste polyethylene | waste polyethylene | Cutoff, S - NO	9.375e-09	CTUh				0.0028	market for waste polyethylene | waste polyethylene | Cutoff, S - NO	9.375e-09	CTUh
	0	0.0021	metal working, average for aluminium product manufacturing | metal working, average for aluminium product manufacturing | Cutoff, S - RER	2.29167e-08	CTUh			0.0901		GoE - Wood-Based Infill	1.28958e-07	CTUh				0.0024	diesel, burned in building machine | diesel, burned in building machine | Cutoff, S - GLO	4.16667e-09	CTUh				0.0012	diesel, burned in building machine | diesel, burned in building machine | Cutoff, S - GLO	4.16667e-09	CTUh
	0	0.0011	concrete block production | concrete block | Cutoff, S - DE	1.25e-08	CTUh				0.0711	treatment of waste wood, untreated, municipal incineration | waste wood, untreated | Cutoff, S - RoW	1.01667e-07	CTUh				0.0021	market for waste concrete | waste concrete | Cutoff, S - Europe without Switzerland	3.54167e-09	CTUh				0.0011	market for waste concrete | waste concrete | Cutoff, S - Europe without Switzerland	3.54167e-09	CTUh
	0	0.0009	market for polyethylene, high density, granulate | polyethylene, high density, granulate | Cutoff, S - GLO	1e-08	CTUh				0.019	Birch wood infill	2.70833e-08	CTUh				0.0001	market for scrap steel | scrap steel | Cutoff, S - Europe without Switzerland	1.43406e-10	CTUh				0	market for scrap steel | scrap steel | Cutoff, S - Europe without Switzerland	1.43406e-10	CTUh
	0	0.0004	market for polypropylene, granulate | polypropylene, granulate | Cutoff, S - GLO	5e-09	CTUh			0.0473		Maintenance: Artificial Gras	6.77083e-08	CTUh			0.0395		Maintenance: Artificial Gras	6.77083e-08	CTUh			0.0202		Maintenance: Artificial Gras	6.77083e-08	CTUh
	0	0.0004	market for extrusion, plastic pipes | extrusion, plastic pipes | Cutoff, S - GLO	5e-09	CTUh				0.0269	market for irrigation | irrigation | Cutoff, S - DE	3.85417e-08	CTUh				0.0224	market for irrigation | irrigation | Cutoff, S - DE	3.85417e-08	CTUh				0.0115	market for irrigation | irrigation | Cutoff, S - DE	3.85417e-08	CTUh
	0	0.0002	diesel, burned in building machine | diesel, burned in building machine | Cutoff, S - GLO	1.85625e-09	CTUh				0.0162	treatment of municipal solid waste, incineration | municipal solid waste | Cutoff, S - NO	2.33333e-08	CTUh				0.0136	treatment of municipal solid waste, incineration | municipal solid waste | Cutoff, S - NO	2.33333e-08	CTUh				0.0069	treatment of municipal solid waste, incineration | municipal solid waste | Cutoff, S - NO	2.33333e-08	CTUh
	0.0255	0	Construction of the base layer - Football Pitch - Natural Turf	2.7875e-07	CTUh				0.0039	diesel, burned in building machine | diesel, burned in building machine | Cutoff, S - GLO	5.625e-09	CTUh				0.0033	diesel, burned in building machine | diesel, burned in building machine | Cutoff, S - GLO	5.625e-09	CTUh				0.0017	diesel, burned in building machine | diesel, burned in building machine | Cutoff, S - GLO	5.625e-09	CTUh
	0	0.0249	market for silica sand | silica sand | Cutoff, S - GLO	2.72083e-07	CTUh				0.0002	treatment of biowaste by anaerobic digestion | biowaste | Cutoff, S - RoW	3.495e-10	CTUh				0.0002	treatment of biowaste by anaerobic digestion | biowaste | Cutoff, S - RoW	3.495e-10	CTUh				0.0001	treatment of biowaste by anaerobic digestion | biowaste | Cutoff, S - RoW	3.495e-10	CTUh
	0	0.0005	diesel, burned in building machine | diesel, burned in building machine | Cutoff, S - GLO	5.41667e-09	CTUh				0.0001	market for electricity, medium voltage | electricity, medium voltage | Cutoff, S - NO	7.65492e-11	CTUh				0	market for electricity, medium voltage | electricity, medium voltage | Cutoff, S - NO	7.65492e-11	CTUh				0	market for electricity, medium voltage | electricity, medium voltage | Cutoff, S - NO	7.65492e-11	CTUh
	0	0.0001	limestone production, crushed, washed | limestone, crushed, washed | Cutoff, S - RoW	1.50686e-09	CTUh			0.039		Football Stadium: Consturction of Piping System - NO	5.58333e-08	CTUh			0.0326		Football Stadium: Consturction of Piping System - NO	5.58333e-08	CTUh			0.0167		Football Stadium: Consturction of Piping System - NO	5.58333e-08	CTUh
	0.0102	0	Football Stadium: Consturction of Piping System - NO	1.11667e-07	CTUh				0.0243	market for gravel, round | gravel, round | Cutoff, S - RoW	3.47917e-08	CTUh				0.0203	market for gravel, round | gravel, round | Cutoff, S - RoW	3.47917e-08	CTUh				0.0104	market for gravel, round | gravel, round | Cutoff, S - RoW	3.47917e-08	CTUh
	0	0.0064	market for gravel, round | gravel, round | Cutoff, S - RoW	6.95833e-08	CTUh				0.0043	market for polyethylene, high density, granulate | polyethylene, high density, granulate | Cutoff, S - GLO	6.04167e-09	CTUh				0.0036	market for polyethylene, high density, granulate | polyethylene, high density, granulate | Cutoff, S - GLO	6.04167e-09	CTUh				0.0018	market for polyethylene, high density, granulate | polyethylene, high density, granulate | Cutoff, S - GLO	6.04167e-09	CTUh
	0	0.0011	market for polyethylene, high density, granulate | polyethylene, high density, granulate | Cutoff, S - GLO	1.20833e-08	CTUh				0.0041	market for polypropylene, granulate | polypropylene, granulate | Cutoff, S - GLO	5.83333e-09	CTUh				0.0034	market for polypropylene, granulate | polypropylene, granulate | Cutoff, S - GLO	5.83333e-09	CTUh				0.0018	market for polypropylene, granulate | polypropylene, granulate | Cutoff, S - GLO	5.83333e-09	CTUh
	0	0.0011	market for polypropylene, granulate | polypropylene, granulate | Cutoff, S - GLO	1.16667e-08	CTUh				0.0039	diesel, burned in building machine | diesel, burned in building machine | Cutoff, S - GLO	5.625e-09	CTUh				0.0032	diesel, burned in building machine | diesel, burned in building machine | Cutoff, S - GLO	5.625e-09	CTUh				0.0016	diesel, burned in building machine | diesel, burned in building machine | Cutoff, S - GLO	5.625e-09	CTUh
	0	0.001	diesel, burned in building machine | diesel, burned in building machine | Cutoff, S - GLO	1.125e-08	CTUh				0.0022	extrusion, plastic pipes | extrusion, plastic pipes | Cutoff, S - RER	3.125e-09	CTUh				0.0018	extrusion, plastic pipes | extrusion, plastic pipes | Cutoff, S - RER	3.125e-09	CTUh				0.0009	extrusion, plastic pipes | extrusion, plastic pipes | Cutoff, S - RER	3.125e-09	CTUh
	0	0.0006	extrusion, plastic pipes | extrusion, plastic pipes | Cutoff, S - RER	6.25e-09	CTUh				0.0003	market for concrete, normal strength | concrete, normal strength | Cutoff, S - RoW	3.74194e-10	CTUh				0.0002	market for concrete, normal strength | concrete, normal strength | Cutoff, S - RoW	3.74194e-10	CTUh				0.0001	market for concrete, normal strength | concrete, normal strength | Cutoff, S - RoW	3.74194e-10	CTUh
	0	0.0001	market for concrete, normal strength | concrete, normal strength | Cutoff, S - RoW	7.48387e-10	CTUh			0.0351		Football Stadium: Construction of Groundworks - Artificial Turf - NO	5.02083e-08	CTUh			0.0293		Football Stadium: Construction of Groundworks - Artificial Turf - NO	5.02083e-08	CTUh			0.015		Football Stadium: Construction of Groundworks - Artificial Turf - NO	5.02083e-08	CTUh
	0.0078	0	Football Stadium: Construction of the Drainage Layer - NO	8.5e-08	CTUh				0.0211	treatment of biowaste by anaerobic digestion | biowaste | Cutoff, S - RoW	3.02083e-08	CTUh				0.0176	treatment of biowaste by anaerobic digestion | biowaste | Cutoff, S - RoW	3.02083e-08	CTUh				0.009	treatment of biowaste by anaerobic digestion | biowaste | Cutoff, S - RoW	3.02083e-08	CTUh
	0	0.0073	market for sand | sand | Cutoff, S - RoW	8e-08	CTUh				0.0078	market for quicklime, milled, packed | quicklime, milled, packed | Cutoff, S - RER	1.125e-08	CTUh				0.0065	market for quicklime, milled, packed | quicklime, milled, packed | Cutoff, S - RER	1.125e-08	CTUh				0.0033	market for quicklime, milled, packed | quicklime, milled, packed | Cutoff, S - RER	1.125e-08	CTUh
	0	0.0005	diesel, burned in building machine | diesel, burned in building machine | Cutoff, S - GLO	5e-09	CTUh				0.0062	diesel, burned in building machine | diesel, burned in building machine | Cutoff, S - GLO	8.75e-09	CTUh				0.0052	diesel, burned in building machine | diesel, burned in building machine | Cutoff, S - GLO	8.75e-09	CTUh				0.0026	diesel, burned in building machine | diesel, burned in building machine | Cutoff, S - GLO	8.75e-09	CTUh
	0.0067	0	Football Stadium: Construction of Groundworks - Natural Turf - NO	7.375e-08	CTUh			0.0128		Construction of Artificial Gras	1.83333e-08	CTUh			0.0107		Construction of Artificial Gras	1.83333e-08	CTUh			0.0055		Construction of Artificial Gras	1.83333e-08	CTUh
	0	0.0055	treatment of biowaste by anaerobic digestion | biowaste | Cutoff, S - RoW	6.04167e-08	CTUh				0.0088	market for silica sand | silica sand | Cutoff, S - GLO	1.27083e-08	CTUh				0.0074	market for silica sand | silica sand | Cutoff, S - GLO	1.27083e-08	CTUh				0.0038	market for silica sand | silica sand | Cutoff, S - GLO	1.27083e-08	CTUh
	0	0.0012	diesel, burned in building machine | diesel, burned in building machine | Cutoff, S - GLO	1.33333e-08	CTUh				0.0017	polyethylene production, high density, granulate | polyethylene, high density, granulate | Cutoff, S - RER	2.5e-09	CTUh				0.0014	polyethylene production, high density, granulate | polyethylene, high density, granulate | Cutoff, S - RER	2.5e-09	CTUh				0.0007	polyethylene production, high density, granulate | polyethylene, high density, granulate | Cutoff, S - RER	2.5e-09	CTUh
	0.0065	0	Construction of natural gras	7.125e-08	CTUh				0.0015	polypropylene production, granulate | polypropylene, granulate | Cutoff, S - RER	2.29167e-09	CTUh				0.0013	polypropylene production, granulate | polypropylene, granulate | Cutoff, S - RER	2.29167e-09	CTUh				0.0007	polypropylene production, granulate | polypropylene, granulate | Cutoff, S - RER	2.29167e-09	CTUh
	0	0.0036	market for grass seed, organic, for sowing | grass seed, organic, for sowing | Cutoff, S - GLO	3.95833e-08	CTUh				0.0007	diesel, burned in building machine | diesel, burned in building machine | Cutoff, S - GLO	1.06808e-09	CTUh				0.0006	diesel, burned in building machine | diesel, burned in building machine | Cutoff, S - GLO	1.06808e-09	CTUh				0.0003	diesel, burned in building machine | diesel, burned in building machine | Cutoff, S - GLO	1.06808e-09	CTUh
	0	0.0013	market for inorganic phosphorus fertiliser, as P2O5 | inorganic phosphorus fertiliser, as P2O5 | Cutoff, S - NO	1.375e-08	CTUh
	0	0.0005	market for inorganic nitrogen fertiliser, as N | inorganic nitrogen fertiliser, as N | Cutoff, S - NO	5.83333e-09	CTUh
	0	0.0005	irrigation, sprinkler | irrigation | Cutoff, S - DE	5e-09	CTUh
	0	0.0004	diesel, burned in building machine | diesel, burned in building machine | Cutoff, S - GLO	4.16667e-09	CTUh
	0	0.0002	market for inorganic potassium fertiliser, as K2O | inorganic potassium fertiliser, as K2O | Cutoff, S - NO	2.65813e-09	CTUh
	0.0043	0	Renovation: Natural Turf	4.70833e-08	CTUh
	0	0.0035	treatment of biowaste by anaerobic digestion | biowaste | Cutoff, S - RoW	3.79167e-08	CTUh
	0	0.0007	Construction of natural gras	7.08333e-09	CTUh
	0	0.0002	diesel, burned in building machine | diesel, burned in building machine | Cutoff, S - GLO	2.14353e-09	CTUh

## Sheet: IonizingRadiation
Natural Gras							Wood-Based Infill							ELT - Base							EPDM - Base
Percentual Contribution			Process	Amount	Unit		Percentual Contribution			Process	Amount	Unit		Percentual Contribution			Process	Amount	Unit		Percentual Contribution			Process	Amount	Unit
1			Natural Gras - Benchmark	77.225	Bq C-14 eq		1			GOE - Wood based infill	41.3494	Bq C-14 eq		1			Artificial Gras - ELT - Base Case	39.9658	Bq C-14 eq		1	0	0	Artificial Gras - EPDM - Base Case	201.84	Bq C-14 eq
	0.5556		Maintenance: Natural Gras	42.9067	Bq C-14 eq			0.3312	0	Construction of the base layer - Football Pitch - Artificial Turf	13.6964	Bq C-14 eq			0.3427	0	Construction of the base layer - Football Pitch - Artificial Turf	13.6964	Bq C-14 eq			0.8073	0	EPDM - Base Case	162.953	Bq C-14 eq
		0.1597	market for inorganic nitrogen fertiliser, as N | inorganic nitrogen fertiliser, as N | Cutoff, S - NO	12.3352	Bq C-14 eq			0	0.2062	market for gravel, crushed | gravel, crushed | Cutoff, S - RoW	8.52477	Bq C-14 eq			0	0.2133	market for gravel, crushed | gravel, crushed | Cutoff, S - RoW	8.52477	Bq C-14 eq			0	0.8037	synthetic rubber production | synthetic rubber | Cutoff, S - RER	162.229	Bq C-14 eq
		0.1118	market for irrigation | irrigation | Cutoff, S - DE	8.63167	Bq C-14 eq			0	0.1166	mastic asphalt production | mastic asphalt | Cutoff, S - RoW	4.82304	Bq C-14 eq			0	0.1207	mastic asphalt production | mastic asphalt | Cutoff, S - RoW	4.82304	Bq C-14 eq			0	0.0036	treatment of waste rubber, unspecified, municipal incineration | waste rubber, unspecified | Cutoff, S - Europe without Switzerland	0.724302	Bq C-14 eq
		0.1022	market for inorganic potassium fertiliser, as K2O | inorganic potassium fertiliser, as K2O | Cutoff, S - NO	7.89187	Bq C-14 eq			0	0.0049	market for sand | sand | Cutoff, S - RoW	0.202997	Bq C-14 eq			0	0.0051	market for sand | sand | Cutoff, S - RoW	0.202997	Bq C-14 eq			0.0679	0	Construction of the base layer - Football Pitch - Artificial Turf	13.6964	Bq C-14 eq
		0.0527	market for sand | sand | Cutoff, S - CH	4.06955	Bq C-14 eq			0	0.0024	diesel, burned in building machine | diesel, burned in building machine | Cutoff, S - GLO	0.0994183	Bq C-14 eq			0	0.0025	diesel, burned in building machine | diesel, burned in building machine | Cutoff, S - GLO	0.0994183	Bq C-14 eq			0	0.0422	market for gravel, crushed | gravel, crushed | Cutoff, S - RoW	8.52477	Bq C-14 eq
		0.0317	market for grass seed, organic, for sowing | grass seed, organic, for sowing | Cutoff, S - GLO	2.44572	Bq C-14 eq			0	0.0011	concrete block production | concrete block | Cutoff, S - RoW	0.0461743	Bq C-14 eq			0	0.0012	concrete block production | concrete block | Cutoff, S - RoW	0.0461743	Bq C-14 eq			0	0.0239	mastic asphalt production | mastic asphalt | Cutoff, S - RoW	4.82304	Bq C-14 eq
		0.0269	market for inorganic phosphorus fertiliser, as P2O5 | inorganic phosphorus fertiliser, as P2O5 | Cutoff, S - NO	2.07635	Bq C-14 eq			0.2251	0	Renovation: Artificial Turf	9.3084	Bq C-14 eq			0.2329	0	Renovation: Artificial Turf	9.3084	Bq C-14 eq			0	0.001	market for sand | sand | Cutoff, S - RoW	0.202997	Bq C-14 eq
		0.0237	market for alkyd paint, white, without solvent, in 60% solution state | alkyd paint, white, without solvent, in 60% solution state | Cutoff, S - RER	1.82855	Bq C-14 eq			0	0.1199	polyethylene production, high density, granulate | polyethylene, high density, granulate | Cutoff, S - RER	4.95848	Bq C-14 eq			0	0.1241	polyethylene production, high density, granulate | polyethylene, high density, granulate | Cutoff, S - RER	4.95848	Bq C-14 eq			0	0.0005	diesel, burned in building machine | diesel, burned in building machine | Cutoff, S - GLO	0.0994183	Bq C-14 eq
		0.0154	diesel, burned in building machine | diesel, burned in building machine | Cutoff, S - GLO	1.19302	Bq C-14 eq			0	0.0937	polypropylene production, granulate | polypropylene, granulate | Cutoff, S - RER	3.87342	Bq C-14 eq			0	0.0969	polypropylene production, granulate | polypropylene, granulate | Cutoff, S - RER	3.87342	Bq C-14 eq			0	0.0002	concrete block production | concrete block | Cutoff, S - RoW	0.0461743	Bq C-14 eq
		0.0149	treatment of biowaste by anaerobic digestion | biowaste | Cutoff, S - RoW	1.14762	Bq C-14 eq			0	0.0068	silica sand production | silica sand | Cutoff, S - RoW	0.282808	Bq C-14 eq			0	0.0071	silica sand production | silica sand | Cutoff, S - RoW	0.282808	Bq C-14 eq			0.0461	0	Renovation: Artificial Turf	9.3084	Bq C-14 eq
		0.0104	Construction of natural gras	0.805192	Bq C-14 eq			0	0.003	diesel, burned in building machine | diesel, burned in building machine | Cutoff, S - GLO	0.125992	Bq C-14 eq			0	0.0032	diesel, burned in building machine | diesel, burned in building machine | Cutoff, S - GLO	0.125992	Bq C-14 eq			0	0.0246	polyethylene production, high density, granulate | polyethylene, high density, granulate | Cutoff, S - RER	4.95848	Bq C-14 eq
		0.0036	market for pesticide, unspecified | pesticide, unspecified | Cutoff, S - GLO	0.279021	Bq C-14 eq			0	0.0016	treatment of waste plastic, mixture, municipal incineration | waste plastic, mixture | Cutoff, S - RoW	0.0676927	Bq C-14 eq			0	0.0017	treatment of waste plastic, mixture, municipal incineration | waste plastic, mixture | Cutoff, S - RoW	0.0676927	Bq C-14 eq			0	0.0192	polypropylene production, granulate | polypropylene, granulate | Cutoff, S - RER	3.87342	Bq C-14 eq
		0.0008	market for electricity, medium voltage | electricity, medium voltage | Cutoff, S - NO	0.0589142	Bq C-14 eq			0.1911	0	Football Stadium: Infrastructure, Lights, Fence and Mowing edges	7.89985	Bq C-14 eq			0.1977	0	Football Stadium: Infrastructure, Lights, Fence and Mowing edges	7.89985	Bq C-14 eq			0	0.0014	silica sand production | silica sand | Cutoff, S - RoW	0.282808	Bq C-14 eq
		0.0006	market for fosetyl-Al | fosetyl-Al | Cutoff, S - GLO	0.0467085	Bq C-14 eq			0	0.0637	aluminium production, primary, ingot | aluminium, primary, ingot | Cutoff, S - IAI Area, EU27 & EFTA	2.63267	Bq C-14 eq			0	0.0659	aluminium production, primary, ingot | aluminium, primary, ingot | Cutoff, S - IAI Area, EU27 & EFTA	2.63267	Bq C-14 eq			0	0.0006	diesel, burned in building machine | diesel, burned in building machine | Cutoff, S - GLO	0.125992	Bq C-14 eq
		0.0004	market for chlorothalonil | chlorothalonil | Cutoff, S - GLO	0.0328713	Bq C-14 eq			0	0.0521	market for concrete, normal strength | concrete, normal strength | Cutoff, S - AT	2.1534	Bq C-14 eq			0	0.0539	market for concrete, normal strength | concrete, normal strength | Cutoff, S - AT	2.1534	Bq C-14 eq			0	0.0003	treatment of waste plastic, mixture, municipal incineration | waste plastic, mixture | Cutoff, S - RoW	0.0676927	Bq C-14 eq
		0.0004	market for steel, low-alloyed, hot rolled | steel, low-alloyed, hot rolled | Cutoff, S - GLO	0.0278169	Bq C-14 eq			0	0.0205	electronic component production, passive, unspecified | electronic component, passive, unspecified | Cutoff, S - GLO	0.847877	Bq C-14 eq			0	0.0212	electronic component production, passive, unspecified | electronic component, passive, unspecified | Cutoff, S - GLO	0.847877	Bq C-14 eq			0.0391	0	Football Stadium: Infrastructure, Lights, Fence and Mowing edges	7.89985	Bq C-14 eq
		0.0003	market for tap water | tap water | Cutoff, S - Europe without Switzerland	0.0200065	Bq C-14 eq			0	0.0145	market for steel, low-alloyed | steel, low-alloyed | Cutoff, S - GLO	0.60039	Bq C-14 eq			0	0.015	market for steel, low-alloyed | steel, low-alloyed | Cutoff, S - GLO	0.60039	Bq C-14 eq			0	0.013	aluminium production, primary, ingot | aluminium, primary, ingot | Cutoff, S - IAI Area, EU27 & EFTA	2.63267	Bq C-14 eq
		0.0002	treatment of municipal solid waste, incineration | municipal solid waste | Cutoff, S - NO	0.0167348	Bq C-14 eq			0	0.0132	market for reinforcing steel | reinforcing steel | Cutoff, S - GLO	0.545673	Bq C-14 eq			0	0.0137	market for reinforcing steel | reinforcing steel | Cutoff, S - GLO	0.545673	Bq C-14 eq			0	0.0107	market for concrete, normal strength | concrete, normal strength | Cutoff, S - AT	2.1534	Bq C-14 eq
	0.2046		Football Stadium: Infrastructure, Lights, Fence and Mowing edges	15.7997	Bq C-14 eq			0	0.0114	metal working, average for aluminium product manufacturing | metal working, average for aluminium product manufacturing | Cutoff, S - RER	0.471102	Bq C-14 eq			0	0.0118	metal working, average for aluminium product manufacturing | metal working, average for aluminium product manufacturing | Cutoff, S - RER	0.471102	Bq C-14 eq			0	0.0042	electronic component production, passive, unspecified | electronic component, passive, unspecified | Cutoff, S - GLO	0.847877	Bq C-14 eq
		0.0682	aluminium production, primary, ingot | aluminium, primary, ingot | Cutoff, S - IAI Area, EU27 & EFTA	5.26533	Bq C-14 eq			0	0.0066	market for extrusion, plastic pipes | extrusion, plastic pipes | Cutoff, S - GLO	0.27405	Bq C-14 eq			0	0.0069	market for extrusion, plastic pipes | extrusion, plastic pipes | Cutoff, S - GLO	0.27405	Bq C-14 eq			0	0.003	market for steel, low-alloyed | steel, low-alloyed | Cutoff, S - GLO	0.60039	Bq C-14 eq
		0.0558	market for concrete, normal strength | concrete, normal strength | Cutoff, S - AT	4.30679	Bq C-14 eq			0	0.0045	market for polyethylene, high density, granulate | polyethylene, high density, granulate | Cutoff, S - GLO	0.18571	Bq C-14 eq			0	0.0046	market for polyethylene, high density, granulate | polyethylene, high density, granulate | Cutoff, S - GLO	0.18571	Bq C-14 eq			0	0.0027	market for reinforcing steel | reinforcing steel | Cutoff, S - GLO	0.545673	Bq C-14 eq
		0.022	electronic component production, passive, unspecified | electronic component, passive, unspecified | Cutoff, S - GLO	1.69575	Bq C-14 eq			0	0.0022	concrete block production | concrete block | Cutoff, S - DE	0.0907173	Bq C-14 eq			0	0.0023	concrete block production | concrete block | Cutoff, S - DE	0.0907173	Bq C-14 eq			0	0.0023	metal working, average for aluminium product manufacturing | metal working, average for aluminium product manufacturing | Cutoff, S - RER	0.471102	Bq C-14 eq
		0.0155	market for steel, low-alloyed | steel, low-alloyed | Cutoff, S - GLO	1.20078	Bq C-14 eq			0	0.0018	market for polypropylene, granulate | polypropylene, granulate | Cutoff, S - GLO	0.0748655	Bq C-14 eq			0	0.0019	market for polypropylene, granulate | polypropylene, granulate | Cutoff, S - GLO	0.0748655	Bq C-14 eq			0	0.0014	market for extrusion, plastic pipes | extrusion, plastic pipes | Cutoff, S - GLO	0.27405	Bq C-14 eq
		0.0141	market for reinforcing steel | reinforcing steel | Cutoff, S - GLO	1.09135	Bq C-14 eq			0	0.0006	diesel, burned in building machine | diesel, burned in building machine | Cutoff, S - GLO	0.0234144	Bq C-14 eq			0	0.0006	diesel, burned in building machine | diesel, burned in building machine | Cutoff, S - GLO	0.0234144	Bq C-14 eq			0	0.0009	market for polyethylene, high density, granulate | polyethylene, high density, granulate | Cutoff, S - GLO	0.18571	Bq C-14 eq
		0.0122	metal working, average for aluminium product manufacturing | metal working, average for aluminium product manufacturing | Cutoff, S - RER	0.942204	Bq C-14 eq			0.0595	0	GoE - Wood-Based Infill	2.46227	Bq C-14 eq			0.0615	0	Football Stadium: Consturction of Piping System - NO	2.45733	Bq C-14 eq			0	0.0004	concrete block production | concrete block | Cutoff, S - DE	0.0907173	Bq C-14 eq
		0.0071	market for extrusion, plastic pipes | extrusion, plastic pipes | Cutoff, S - GLO	0.5481	Bq C-14 eq			0	0.058	Birch wood infill	2.39731	Bq C-14 eq			0	0.0282	market for gravel, round | gravel, round | Cutoff, S - RoW	1.1261	Bq C-14 eq			0	0.0004	market for polypropylene, granulate | polypropylene, granulate | Cutoff, S - GLO	0.0748655	Bq C-14 eq
		0.0048	market for polyethylene, high density, granulate | polyethylene, high density, granulate | Cutoff, S - GLO	0.371421	Bq C-14 eq			0	0.0016	treatment of waste wood, untreated, municipal incineration | waste wood, untreated | Cutoff, S - RoW	0.0649616	Bq C-14 eq			0	0.0196	extrusion, plastic pipes | extrusion, plastic pipes | Cutoff, S - RER	0.783648	Bq C-14 eq			0	0.0001	diesel, burned in building machine | diesel, burned in building machine | Cutoff, S - GLO	0.0234144	Bq C-14 eq
		0.0023	concrete block production | concrete block | Cutoff, S - DE	0.181435	Bq C-14 eq			0.0594	0	Football Stadium: Consturction of Piping System - NO	2.45733	Bq C-14 eq			0	0.0056	market for polyethylene, high density, granulate | polyethylene, high density, granulate | Cutoff, S - GLO	0.222852	Bq C-14 eq			0.0122	0	Football Stadium: Consturction of Piping System - NO	2.45733	Bq C-14 eq
		0.0019	market for polypropylene, granulate | polypropylene, granulate | Cutoff, S - GLO	0.149731	Bq C-14 eq			0	0.0272	market for gravel, round | gravel, round | Cutoff, S - RoW	1.1261	Bq C-14 eq			0	0.0045	market for polypropylene, granulate | polypropylene, granulate | Cutoff, S - GLO	0.179677	Bq C-14 eq			0	0.0056	market for gravel, round | gravel, round | Cutoff, S - RoW	1.1261	Bq C-14 eq
		0.0006	diesel, burned in building machine | diesel, burned in building machine | Cutoff, S - GLO	0.0468288	Bq C-14 eq			0	0.019	extrusion, plastic pipes | extrusion, plastic pipes | Cutoff, S - RER	0.783648	Bq C-14 eq			0	0.0035	diesel, burned in building machine | diesel, burned in building machine | Cutoff, S - GLO	0.139371	Bq C-14 eq			0	0.0039	extrusion, plastic pipes | extrusion, plastic pipes | Cutoff, S - RER	0.783648	Bq C-14 eq
	0.0636		Football Stadium: Consturction of Piping System - NO	4.91467	Bq C-14 eq			0	0.0054	market for polyethylene, high density, granulate | polyethylene, high density, granulate | Cutoff, S - GLO	0.222852	Bq C-14 eq			0	0.0001	market for concrete, normal strength | concrete, normal strength | Cutoff, S - RoW	0.00568652	Bq C-14 eq			0	0.0011	market for polyethylene, high density, granulate | polyethylene, high density, granulate | Cutoff, S - GLO	0.222852	Bq C-14 eq
		0.0292	market for gravel, round | gravel, round | Cutoff, S - RoW	2.2522	Bq C-14 eq			0	0.0043	market for polypropylene, granulate | polypropylene, granulate | Cutoff, S - GLO	0.179677	Bq C-14 eq			0.0593	0	Football Stadium: Construction of Groundworks - Artificial Turf - NO	2.36902	Bq C-14 eq			0	0.0009	market for polypropylene, granulate | polypropylene, granulate | Cutoff, S - GLO	0.179677	Bq C-14 eq
		0.0203	extrusion, plastic pipes | extrusion, plastic pipes | Cutoff, S - RER	1.5673	Bq C-14 eq			0	0.0034	diesel, burned in building machine | diesel, burned in building machine | Cutoff, S - GLO	0.139371	Bq C-14 eq			0	0.0474	market for quicklime, milled, packed | quicklime, milled, packed | Cutoff, S - RER	1.8953	Bq C-14 eq			0	0.0007	diesel, burned in building machine | diesel, burned in building machine | Cutoff, S - GLO	0.139371	Bq C-14 eq
		0.0058	market for polyethylene, high density, granulate | polyethylene, high density, granulate | Cutoff, S - GLO	0.445704	Bq C-14 eq			0	0.0001	market for concrete, normal strength | concrete, normal strength | Cutoff, S - RoW	0.00568652	Bq C-14 eq			0	0.0063	treatment of biowaste by anaerobic digestion | biowaste | Cutoff, S - RoW	0.250729	Bq C-14 eq			0	0	market for concrete, normal strength | concrete, normal strength | Cutoff, S - RoW	0.00568652	Bq C-14 eq
		0.0047	market for polypropylene, granulate | polypropylene, granulate | Cutoff, S - GLO	0.359355	Bq C-14 eq			0.0573	0	Football Stadium: Construction of Groundworks - Artificial Turf - NO	2.36902	Bq C-14 eq			0	0.0056	diesel, burned in building machine | diesel, burned in building machine | Cutoff, S - GLO	0.222994	Bq C-14 eq			0.0117	0	Football Stadium: Construction of Groundworks - Artificial Turf - NO	2.36902	Bq C-14 eq
		0.0036	diesel, burned in building machine | diesel, burned in building machine | Cutoff, S - GLO	0.278743	Bq C-14 eq			0	0.0458	market for quicklime, milled, packed | quicklime, milled, packed | Cutoff, S - RER	1.8953	Bq C-14 eq			0.039	0	Maintenance: Artificial Gras	1.55963	Bq C-14 eq			0	0.0094	market for quicklime, milled, packed | quicklime, milled, packed | Cutoff, S - RER	1.8953	Bq C-14 eq
		0.0001	market for concrete, normal strength | concrete, normal strength | Cutoff, S - RoW	0.011373	Bq C-14 eq			0	0.0061	treatment of biowaste by anaerobic digestion | biowaste | Cutoff, S - RoW	0.250729	Bq C-14 eq			0	0.0344	market for irrigation | irrigation | Cutoff, S - DE	1.37622	Bq C-14 eq			0	0.0012	treatment of biowaste by anaerobic digestion | biowaste | Cutoff, S - RoW	0.250729	Bq C-14 eq
	0.054		Demolition of a football pitch: Natural Gras	4.17363	Bq C-14 eq			0	0.0054	diesel, burned in building machine | diesel, burned in building machine | Cutoff, S - GLO	0.222994	Bq C-14 eq			0	0.0036	diesel, burned in building machine | diesel, burned in building machine | Cutoff, S - GLO	0.142159	Bq C-14 eq			0	0.0011	diesel, burned in building machine | diesel, burned in building machine | Cutoff, S - GLO	0.222994	Bq C-14 eq
		0.0287	treatment of inert waste, sanitary landfill | inert waste | Cutoff, S - Europe without Switzerland	2.21607	Bq C-14 eq			0.0377	0	Maintenance: Artificial Gras	1.55963	Bq C-14 eq			0	0.0006	market for electricity, medium voltage | electricity, medium voltage | Cutoff, S - NO	0.0227151	Bq C-14 eq			0.0077	0	Maintenance: Artificial Gras	1.55963	Bq C-14 eq
		0.0195	market for waste concrete | waste concrete | Cutoff, S - Europe without Switzerland	1.50623	Bq C-14 eq			0	0.0333	market for irrigation | irrigation | Cutoff, S - DE	1.37622	Bq C-14 eq			0	0.0004	treatment of municipal solid waste, incineration | municipal solid waste | Cutoff, S - NO	0.0156338	Bq C-14 eq			0	0.0068	market for irrigation | irrigation | Cutoff, S - DE	1.37622	Bq C-14 eq
		0.003	market for waste reinforced concrete | waste reinforced concrete | Cutoff, S - Europe without Switzerland	0.230269	Bq C-14 eq			0	0.0034	diesel, burned in building machine | diesel, burned in building machine | Cutoff, S - GLO	0.142159	Bq C-14 eq			0	0.0001	treatment of biowaste by anaerobic digestion | biowaste | Cutoff, S - RoW	0.00290129	Bq C-14 eq			0	0.0007	diesel, burned in building machine | diesel, burned in building machine | Cutoff, S - GLO	0.142159	Bq C-14 eq
		0.0027	diesel, burned in building machine | diesel, burned in building machine | Cutoff, S - GLO	0.20627	Bq C-14 eq			0	0.0005	market for electricity, medium voltage | electricity, medium voltage | Cutoff, S - NO	0.0227151	Bq C-14 eq			0.027	0	ELT - Base Case	1.07885	Bq C-14 eq			0	0.0001	market for electricity, medium voltage | electricity, medium voltage | Cutoff, S - NO	0.0227151	Bq C-14 eq
		0.0001	market for scrap steel | scrap steel | Cutoff, S - Europe without Switzerland	0.00649086	Bq C-14 eq			0	0.0004	treatment of municipal solid waste, incineration | municipal solid waste | Cutoff, S - NO	0.0156338	Bq C-14 eq			0	0.019	treatment of waste rubber, unspecified, municipal incineration | waste rubber, unspecified | Cutoff, S - Europe without Switzerland	0.758506	Bq C-14 eq			0	0.0001	treatment of municipal solid waste, incineration | municipal solid waste | Cutoff, S - NO	0.0156338	Bq C-14 eq
		0.0001	market for waste polyethylene | waste polyethylene | Cutoff, S - NO	0.00425761	Bq C-14 eq			0	0.0001	treatment of biowaste by anaerobic digestion | biowaste | Cutoff, S - RoW	0.00290129	Bq C-14 eq			0	0.008	Production of ELT	0.32034	Bq C-14 eq			0	0	treatment of biowaste by anaerobic digestion | biowaste | Cutoff, S - RoW	0.00290129	Bq C-14 eq
		0.0001	market for waste polypropylene | waste polypropylene | Cutoff, S - NO	0.00404166	Bq C-14 eq			0.0228	0	Demolition of a football pitch: Artificial Gras	0.943046	Bq C-14 eq			0.0236	0	Demolition of a football pitch: Artificial Gras	0.943046	Bq C-14 eq			0.0047	0	Demolition of a football pitch: Artificial Gras	0.943046	Bq C-14 eq
	0.0539		Construction of the base layer - Football Pitch - Natural Turf	4.16158	Bq C-14 eq			0	0.0141	treatment of waste asphalt, sanitary landfill | waste asphalt | Cutoff, S - RoW	0.581844	Bq C-14 eq			0	0.0146	treatment of waste asphalt, sanitary landfill | waste asphalt | Cutoff, S - RoW	0.581844	Bq C-14 eq			0	0.0029	treatment of waste asphalt, sanitary landfill | waste asphalt | Cutoff, S - RoW	0.581844	Bq C-14 eq
		0.0516	market for silica sand | silica sand | Cutoff, S - GLO	3.9845	Bq C-14 eq			0	0.003	market for waste concrete | waste concrete | Cutoff, S - Europe without Switzerland	0.123805	Bq C-14 eq			0	0.0031	market for waste concrete | waste concrete | Cutoff, S - Europe without Switzerland	0.123805	Bq C-14 eq			0	0.0006	market for waste concrete | waste concrete | Cutoff, S - Europe without Switzerland	0.123805	Bq C-14 eq
		0.0017	diesel, burned in building machine | diesel, burned in building machine | Cutoff, S - GLO	0.134912	Bq C-14 eq			0	0.0028	market for waste reinforced concrete | waste reinforced concrete | Cutoff, S - Europe without Switzerland	0.115135	Bq C-14 eq			0	0.0029	market for waste reinforced concrete | waste reinforced concrete | Cutoff, S - Europe without Switzerland	0.115135	Bq C-14 eq			0	0.0006	market for waste reinforced concrete | waste reinforced concrete | Cutoff, S - Europe without Switzerland	0.115135	Bq C-14 eq
		0.0005	limestone production, crushed, washed | limestone, crushed, washed | Cutoff, S - RoW	0.0421709	Bq C-14 eq			0	0.0025	diesel, burned in building machine | diesel, burned in building machine | Cutoff, S - GLO	0.103135	Bq C-14 eq			0	0.0026	diesel, burned in building machine | diesel, burned in building machine | Cutoff, S - GLO	0.103135	Bq C-14 eq			0	0.0005	diesel, burned in building machine | diesel, burned in building machine | Cutoff, S - GLO	0.103135	Bq C-14 eq
	0.0321		Football Stadium: Construction of the Drainage Layer - NO	2.47587	Bq C-14 eq			0	0.0003	market for waste polypropylene | waste polypropylene | Cutoff, S - NO	0.0137529	Bq C-14 eq			0	0.0003	market for waste polypropylene | waste polypropylene | Cutoff, S - NO	0.0137529	Bq C-14 eq			0	0.0001	market for waste polypropylene | waste polypropylene | Cutoff, S - NO	0.0137529	Bq C-14 eq
		0.0304	market for sand | sand | Cutoff, S - RoW	2.34988	Bq C-14 eq			0	0.0001	market for scrap steel | scrap steel | Cutoff, S - Europe without Switzerland	0.00324543	Bq C-14 eq			0	0.0001	market for scrap steel | scrap steel | Cutoff, S - Europe without Switzerland	0.00324543	Bq C-14 eq			0	0	market for scrap steel | scrap steel | Cutoff, S - Europe without Switzerland	0.00324543	Bq C-14 eq
		0.0016	diesel, burned in building machine | diesel, burned in building machine | Cutoff, S - GLO	0.125992	Bq C-14 eq			0	0.0001	market for waste polyethylene | waste polyethylene | Cutoff, S - NO	0.0021288	Bq C-14 eq			0	0.0001	market for waste polyethylene | waste polyethylene | Cutoff, S - NO	0.0021288	Bq C-14 eq			0	0	market for waste polyethylene | waste polyethylene | Cutoff, S - NO	0.0021288	Bq C-14 eq
	0.0187		Construction of natural gras	1.443	Bq C-14 eq			0.0158	0	Construction of Artificial Gras	0.653388	Bq C-14 eq			0.0163	0	Construction of Artificial Gras	0.653388	Bq C-14 eq			0.0032	0	Construction of Artificial Gras	0.653388	Bq C-14 eq
		0.009	market for inorganic phosphorus fertiliser, as P2O5 | inorganic phosphorus fertiliser, as P2O5 | Cutoff, S - NO	0.692117	Bq C-14 eq			0	0.006	polyethylene production, high density, granulate | polyethylene, high density, granulate | Cutoff, S - RER	0.247925	Bq C-14 eq			0	0.0062	polyethylene production, high density, granulate | polyethylene, high density, granulate | Cutoff, S - RER	0.247925	Bq C-14 eq			0	0.0012	polyethylene production, high density, granulate | polyethylene, high density, granulate | Cutoff, S - RER	0.247925	Bq C-14 eq
		0.0035	market for inorganic nitrogen fertiliser, as N | inorganic nitrogen fertiliser, as N | Cutoff, S - NO	0.274115	Bq C-14 eq			0	0.0047	polypropylene production, granulate | polypropylene, granulate | Cutoff, S - RER	0.193671	Bq C-14 eq			0	0.0048	polypropylene production, granulate | polypropylene, granulate | Cutoff, S - RER	0.193671	Bq C-14 eq			0	0.001	polypropylene production, granulate | polypropylene, granulate | Cutoff, S - RER	0.193671	Bq C-14 eq
		0.0025	irrigation, sprinkler | irrigation | Cutoff, S - DE	0.194255	Bq C-14 eq			0	0.0045	market for silica sand | silica sand | Cutoff, S - GLO	0.184848	Bq C-14 eq			0	0.0046	market for silica sand | silica sand | Cutoff, S - GLO	0.184848	Bq C-14 eq			0	0.0009	market for silica sand | silica sand | Cutoff, S - GLO	0.184848	Bq C-14 eq
		0.0017	market for inorganic potassium fertiliser, as K2O | inorganic potassium fertiliser, as K2O | Cutoff, S - NO	0.131531	Bq C-14 eq			0	0.0007	diesel, burned in building machine | diesel, burned in building machine | Cutoff, S - GLO	0.0269452	Bq C-14 eq			0	0.0007	diesel, burned in building machine | diesel, burned in building machine | Cutoff, S - GLO	0.0269452	Bq C-14 eq			0	0.0001	diesel, burned in building machine | diesel, burned in building machine | Cutoff, S - GLO	0.0269452	Bq C-14 eq
		0.0014	diesel, burned in building machine | diesel, burned in building machine | Cutoff, S - GLO	0.107966	Bq C-14 eq
		0.0006	market for grass seed, organic, for sowing | grass seed, organic, for sowing | Cutoff, S - GLO	0.0430144	Bq C-14 eq
	0.0108		Football Stadium: Construction of Groundworks - Natural Turf - NO	0.837808	Bq C-14 eq
		0.0065	treatment of biowaste by anaerobic digestion | biowaste | Cutoff, S - RoW	0.501458	Bq C-14 eq
		0.0044	diesel, burned in building machine | diesel, burned in building machine | Cutoff, S - GLO	0.33635	Bq C-14 eq
	0.0066		Renovation: Natural Turf	0.512146	Bq C-14 eq
		0.0041	treatment of biowaste by anaerobic digestion | biowaste | Cutoff, S - RoW	0.313769	Bq C-14 eq
		0.0019	Construction of natural gras	0.1443	Bq C-14 eq
		0.0007	diesel, burned in building machine | diesel, burned in building machine | Cutoff, S - GLO	0.0540761	Bq C-14 eq

[truncated: 9 more sheets: LandOccupationBiodiversity, LandTransformationBiodiversity, MarineEutrophication, MineralResources, ODP, ParticulateMatter, POCP, TETP, WaterScarcity]
