# Supplementary material
Source: MDPI journal article supplement (https://www.mdpi.com/2071-1050/16/8/3487)
Supplement: s1 [file s1 › TableS4.xlsx]

## Sheet: ELT Base
Midpoint Category		Total Result (Endpoint)			Result per 1h of football	PDF.m2.yr
Climate change, ecosystem quality, long term		855686	PDF.m2.yr		17.8268	PDF.m2.yr
Climate change, ecosystem quality, short term		260455	PDF.m2.yr		5.42615	PDF.m2.yr
Freshwater acidification		4157.69	PDF.m2.yr		0.0866185	PDF.m2.yr
Freshwater ecotoxicity, long term		5479010	PDF.m2.yr		114.146	PDF.m2.yr
Freshwater ecotoxicity, short term		15033.2	PDF.m2.yr		0.313192	PDF.m2.yr
Freshwater eutrophication		79.6129	PDF.m2.yr		0.0016586	PDF.m2.yr
Ionizing radiation, ecosystem quality		2.71839e-05	PDF.m2.yr		5.66331e-10	PDF.m2.yr
Land occupation, biodiversity		5476.16	PDF.m2.yr		0.114087	PDF.m2.yr
Land transformation, biodiversity		62073.6	PDF.m2.yr		1.2932	PDF.m2.yr
Marine acidification, long term		206256	PDF.m2.yr		4.297	PDF.m2.yr
Marine acidification, short term		22389.6	PDF.m2.yr		0.46645	PDF.m2.yr
Marine eutrophication		872.632	PDF.m2.yr		0.0181798	PDF.m2.yr
Physical Effects on Biota					0.00255	PDF.m2.yr
Terrestrial acidification		28810.2	PDF.m2.yr		0.600213	PDF.m2.yr
Thermally polluted water		0.46625	PDF.m2.yr		9.71354e-06	PDF.m2.yr
Water availability, freshwater ecosystem		11.61	PDF.m2.yr		0.000241875	PDF.m2.yr
Water availability, terrestrial ecosystem		555.934	PDF.m2.yr		0.011582	PDF.m2.yr
Total					144.604	PDF.m2.yr

## Sheet: ELT Best
Midpoint Category		Total Result (Endpoint)			Result per 1h of football	PDF.m2.yr
Climate change, ecosystem quality, long term		858459	PDF.m2.yr		17.8846	PDF.m2.yr
Climate change, ecosystem quality, short term		261238	PDF.m2.yr		5.44246	PDF.m2.yr
Freshwater acidification		4158.48	PDF.m2.yr		0.0866351	PDF.m2.yr
Freshwater ecotoxicity, long term		5480120	PDF.m2.yr		114.169	PDF.m2.yr
Freshwater ecotoxicity, short term		15034.1	PDF.m2.yr		0.31321	PDF.m2.yr
Freshwater eutrophication		79.8372	PDF.m2.yr		0.00166328	PDF.m2.yr
Ionizing radiation, ecosystem quality		2.7187e-05	PDF.m2.yr		5.66396e-10	PDF.m2.yr
Land occupation, biodiversity		5476.54	PDF.m2.yr		0.114095	PDF.m2.yr
Land transformation, biodiversity		62075.7	PDF.m2.yr		1.29324	PDF.m2.yr
Marine acidification, long term		206927	PDF.m2.yr		4.31098	PDF.m2.yr
Marine acidification, short term		22462.5	PDF.m2.yr		0.467969	PDF.m2.yr
Marine eutrophication		872.822	PDF.m2.yr		0.0181838	PDF.m2.yr
Physical Effects on Biota					0.0001	PDF.m2.yr
Terrestrial acidification		28816.1	PDF.m2.yr		0.600335	PDF.m2.yr
Thermally polluted water		0.46633	PDF.m2.yr		9.71521e-06	PDF.m2.yr
Water availability, freshwater ecosystem		11.6117	PDF.m2.yr		0.00024191	PDF.m2.yr
Water availability, terrestrial ecosystem		555.935	PDF.m2.yr		0.011582	PDF.m2.yr
Total					144.714	PDF.m2.yr

## Sheet: ELT Worst
Midpoint Category		Total Result (Endpoint)			Result per 1h of football	PDF.m2.yr
Climate change, ecosystem quality, long term		839260	PDF.m2.yr		17.4846	PDF.m2.yr
Climate change, ecosystem quality, short term		255820	PDF.m2.yr		5.32958	PDF.m2.yr
Freshwater acidification		4152.98	PDF.m2.yr		0.0865203	PDF.m2.yr
Freshwater ecotoxicity, long term		5472400	PDF.m2.yr		114.008	PDF.m2.yr
Freshwater ecotoxicity, short term		15027.8	PDF.m2.yr		0.313079	PDF.m2.yr
Freshwater eutrophication		78.285	PDF.m2.yr		0.00163094	PDF.m2.yr
Ionizing radiation, ecosystem quality		2.71657e-05	PDF.m2.yr		5.65952e-10	PDF.m2.yr
Land occupation, biodiversity		5473.89	PDF.m2.yr		0.114039	PDF.m2.yr
Land transformation, biodiversity		62061.1	PDF.m2.yr		1.29294	PDF.m2.yr
Marine acidification, long term		202280	PDF.m2.yr		4.21417	PDF.m2.yr
Marine acidification, short term		21958.1	PDF.m2.yr		0.45746	PDF.m2.yr
Marine eutrophication		871.506	PDF.m2.yr		0.0181564	PDF.m2.yr
Physical Effects on Biota					0.017	PDF.m2.yr
Terrestrial acidification		28775.2	PDF.m2.yr		0.599483	PDF.m2.yr
Thermally polluted water		0.4658	PDF.m2.yr		9.70417e-06	PDF.m2.yr
Water availability, freshwater ecosystem		11.6	PDF.m2.yr		0.000241666	PDF.m2.yr
Water availability, terrestrial ecosystem		555.929	PDF.m2.yr		0.0115818	PDF.m2.yr
Total					143.949	PDF.m2.yr

## Sheet: EPDM Base
Midpoint Category		Total Result (Endpoint)			Result per 1h of football	PDF.m2.yr
Climate change, ecosystem quality, long term		1108370	PDF.m2.yr		23.091	PDF.m2.yr
Climate change, ecosystem quality, short term		350112	PDF.m2.yr		7.294	PDF.m2.yr
Freshwater acidification		8302.02	PDF.m2.yr		0.172959	PDF.m2.yr
Freshwater ecotoxicity, long term		7592400	PDF.m2.yr		158.175	PDF.m2.yr
Freshwater ecotoxicity, short term		28822.4	PDF.m2.yr		0.600467	PDF.m2.yr
Freshwater eutrophication		106.099	PDF.m2.yr		0.00221039	PDF.m2.yr
Ionizing radiation, ecosystem quality		0.00013	PDF.m2.yr		2.70833e-09	PDF.m2.yr
Land occupation, biodiversity		6709.73	PDF.m2.yr		0.139786	PDF.m2.yr
Land transformation, biodiversity		77694.7	PDF.m2.yr		1.61864	PDF.m2.yr
Marine acidification, long term		266753	PDF.m2.yr		5.55735	PDF.m2.yr
Marine acidification, short term		28956.8	PDF.m2.yr		0.603267	PDF.m2.yr
Marine eutrophication		1445.75	PDF.m2.yr		0.0301197	PDF.m2.yr
Physical Effects on Biota					0.00101	PDF.m2.yr
Terrestrial acidification		55552.5	PDF.m2.yr		1.15734	PDF.m2.yr
Thermally polluted water		2.26658	PDF.m2.yr		4.72204e-05	PDF.m2.yr
Water availability, freshwater ecosystem		13.6424	PDF.m2.yr		0.000284216	PDF.m2.yr
Water availability, terrestrial ecosystem		564.578	PDF.m2.yr		0.0117621	PDF.m2.yr
Total					198.455	PDF.m2.yr

## Sheet: EPDM Best
Midpoint Category		Total Result (Endpoint)			Result per 1h of football	PDF.m2.yr
Climate change, ecosystem quality, long term		1111140	PDF.m2.yr		23.1487	PDF.m2.yr
Climate change, ecosystem quality, short term		350895	PDF.m2.yr		7.31031	PDF.m2.yr
Freshwater acidification		8302.82	PDF.m2.yr		0.172975	PDF.m2.yr
Freshwater ecotoxicity, long term		7593520	PDF.m2.yr		158.198	PDF.m2.yr
Freshwater ecotoxicity, short term		28823.3	PDF.m2.yr		0.600485	PDF.m2.yr
Freshwater eutrophication		106.323	PDF.m2.yr		0.00221506	PDF.m2.yr
Ionizing radiation, ecosystem quality		0.00013	PDF.m2.yr		2.70833e-09	PDF.m2.yr
Land occupation, biodiversity		6710.11	PDF.m2.yr		0.139794	PDF.m2.yr
Land transformation, biodiversity		77696.8	PDF.m2.yr		1.61868	PDF.m2.yr
Marine acidification, long term		267425	PDF.m2.yr		5.57135	PDF.m2.yr
Marine acidification, short term		29029.7	PDF.m2.yr		0.604785	PDF.m2.yr
Marine eutrophication		1445.94	PDF.m2.yr		0.0301237	PDF.m2.yr
Physical Effects on Biota					3.98e-05	PDF.m2.yr
Terrestrial acidification		55558.4	PDF.m2.yr		1.15747	PDF.m2.yr
Thermally polluted water		2.26666	PDF.m2.yr		4.72221e-05	PDF.m2.yr
Water availability, freshwater ecosystem		13.644	PDF.m2.yr		0.000284251	PDF.m2.yr
Water availability, terrestrial ecosystem		564.579	PDF.m2.yr		0.0117621	PDF.m2.yr
Total					198.567	PDF.m2.yr

## Sheet: EPDM Worst
Midpoint Category		Total Result (Endpoint)			Result per 1h of football	PDF.m2.yr
Climate change, ecosystem quality, long term		1091940	PDF.m2.yr		22.7488	PDF.m2.yr
Climate change, ecosystem quality, short term		345477	PDF.m2.yr		7.19744	PDF.m2.yr
Freshwater acidification		8297.31	PDF.m2.yr		0.172861	PDF.m2.yr
Freshwater ecotoxicity, long term		7585790	PDF.m2.yr		158.037	PDF.m2.yr
Freshwater ecotoxicity, short term		28817.1	PDF.m2.yr		0.600356	PDF.m2.yr
Freshwater eutrophication		104.771	PDF.m2.yr		0.00218272	PDF.m2.yr
Ionizing radiation, ecosystem quality		0.00013	PDF.m2.yr		2.70833e-09	PDF.m2.yr
Land occupation, biodiversity		6707.46	PDF.m2.yr		0.139739	PDF.m2.yr
Land transformation, biodiversity		77682.2	PDF.m2.yr		1.61838	PDF.m2.yr
Marine acidification, long term		262778	PDF.m2.yr		5.47454	PDF.m2.yr
Marine acidification, short term		28525.3	PDF.m2.yr		0.594277	PDF.m2.yr
Marine eutrophication		1444.62	PDF.m2.yr		0.0300963	PDF.m2.yr
Physical Effects on Biota					0.00676	PDF.m2.yr
Terrestrial acidification		55517.5	PDF.m2.yr		1.15661	PDF.m2.yr
Thermally polluted water		2.26613	PDF.m2.yr		4.7211e-05	PDF.m2.yr
Water availability, freshwater ecosystem		13.6324	PDF.m2.yr		0.000284007	PDF.m2.yr
Water availability, terrestrial ecosystem		564.573	PDF.m2.yr		0.0117619	PDF.m2.yr
Total					197.791	PDF.m2.yr

## Sheet: Natural Grass
Midpoint Category		Total Result (Endpoint)			Result per 1h of football	PDF.m2.yr
Climate change, ecosystem quality, long term		299111	PDF.m2.yr		12.463	PDF.m2.yr
Climate change, ecosystem quality, short term		120753	PDF.m2.yr		5.03137	PDF.m2.yr
Freshwater acidification		11741	PDF.m2.yr		0.489208	PDF.m2.yr
Freshwater ecotoxicity, long term		54612900	PDF.m2.yr		2275.54	PDF.m2.yr
Freshwater ecotoxicity, short term		10473.2	PDF.m2.yr		0.436383	PDF.m2.yr
Freshwater eutrophication		164.991	PDF.m2.yr		0.00687464	PDF.m2.yr
Ionizing radiation, ecosystem quality		2.46378e-05	PDF.m2.yr		1.02658e-09	PDF.m2.yr
Land occupation, biodiversity		9664.4	PDF.m2.yr		0.402683	PDF.m2.yr
Land transformation, biodiversity		258436	PDF.m2.yr		10.7682	PDF.m2.yr
Marine acidification, long term		67048.2	PDF.m2.yr		2.79367	PDF.m2.yr
Marine acidification, short term		7278.26	PDF.m2.yr		0.303261	PDF.m2.yr
Marine eutrophication		21659.9	PDF.m2.yr		0.902496	PDF.m2.yr
Physical Effects on Biota					0	PDF.m2.yr
Terrestrial acidification		107514	PDF.m2.yr		4.47975	PDF.m2.yr
Thermally polluted water		0.43904	PDF.m2.yr		1.82933e-05	PDF.m2.yr
Water availability, freshwater ecosystem		30.7668	PDF.m2.yr		0.00128195	PDF.m2.yr
Water availability, terrestrial ecosystem		1727.6	PDF.m2.yr		0.0719835	PDF.m2.yr
Total					2313.69	PDF.m2.yr

## Sheet: Wood-based infill
Midpoint Category		Total Result (Endpoint)			Result per 1h of football	PDF.m2.yr
Climate change, ecosystem quality, long term		377239	PDF.m2.yr		7.85915	PDF.m2.yr
Climate change, ecosystem quality, short term		125958	PDF.m2.yr		2.62412	PDF.m2.yr
Freshwater acidification		4186.48	PDF.m2.yr		0.0872184	PDF.m2.yr
Freshwater ecotoxicity, long term		3173930	PDF.m2.yr		66.1235	PDF.m2.yr
Freshwater ecotoxicity, short term		15248.1	PDF.m2.yr		0.317669	PDF.m2.yr
Freshwater eutrophication		175.882	PDF.m2.yr		0.00366421	PDF.m2.yr
Ionizing radiation, ecosystem quality		2.84057e-05	PDF.m2.yr		5.91785e-10	PDF.m2.yr
Land occupation, biodiversity		5454.12	PDF.m2.yr		0.113627	PDF.m2.yr
Land transformation, biodiversity		62295.9	PDF.m2.yr		1.29783	PDF.m2.yr
Marine acidification, long term		90356.7	PDF.m2.yr		1.88243	PDF.m2.yr
Marine acidification, short term		9808.45	PDF.m2.yr		0.204343	PDF.m2.yr
Marine eutrophication		889.954	PDF.m2.yr		0.0185407	PDF.m2.yr
Physical Effects on Biota						PDF.m2.yr
Terrestrial acidification		29125.1	PDF.m2.yr		0.606773	PDF.m2.yr
Thermally polluted water		0.47246	PDF.m2.yr		9.84292e-06	PDF.m2.yr
Water availability, freshwater ecosystem		10.7795	PDF.m2.yr		0.000224573	PDF.m2.yr
Water availability, terrestrial ecosystem		556.096	PDF.m2.yr		0.0115853	PDF.m2.yr
Total					81.1507	PDF.m2.yr
