# Supplementary material
Source: MDPI journal article supplement (https://www.mdpi.com/2071-1050/16/8/3487)
Supplement: s1 [file s1 › TableS5.xlsx]

## Sheet: SensitivityEoL
	Sensitivity Analysis - EoL
	Useful life Pitch	30	years		Best Case MP emissions	57.49	kg / lifetime	CF CO2-eq / kg MP 1	0.0126			CO2, CC-ST	0.177	PDF*m2*year/kg
					Base Case MP emissions	1463	kg / lifetime	CF CO2-eq / kg MP 2	3.5			CO2, CC-LT	0.628	PDF*m2*year/kg
	Playing time AT	1600	hours / year		Worst Case MP emissions	9753	kg / lifetime	CF CO2-eq / kg MP 3	9.3			CH4, CC-ST	6	PDF*m2*year/kg
								CF CO2-eq / kg MP 4	22.2			CH4, CC-LT	0.528	PDF*m2*year/kg
												Factor CH4	0.659	kg CH4 / kg Wood Infill
	Scenario	MP Base	MP Best	MP Worst	Wood Base	Wood Best	Wood Worst
	CO2-eq. produced - CF 1	0.000384038	1.50911e-05	0.00256016
	CO2-eq. produced - CF 2	0.106677	0.00419198	0.711156
	CO2-eq. produced - CF 3	0.283456	0.0111387	1.88964
	CO2-eq. produced - CF 4	0.676638	0.0265891	4.51076
	CH4 produced / 1 h of playing				0.00078929	0.0200858	0.133901
	Ecosystem damage (CC LT & ST) - Case 1 / PDF*m2*year/kg	0.00030915	1.21484e-05	0.00206093
	Ecosystem damage (CC LT & ST) - Case 1 / PDF*m2*year/kg	0.0858751	0.00337454	0.572481
	Ecosystem damage (CC LT & ST) - Case 1 / PDF*m2*year/kg	0.228182	0.00896664	1.52116
	Ecosystem damage (CC LT & ST) - Case 1 / PDF*m2*year/kg	0.544693	0.0214042	3.63116
	Ecosystem damage CH4 / PDF*m2*year/kg				0.00515248	0.13112	0.874103
		Result without EoL / PDF*m2*year			CF for CO2-eq. / kg MP	Including EoL / PDF*m2*year	Increase in %
	Wood - Base	81.1507			n/A	81.1559	6.34928e-05
	Wood - Best				n/A	81.2818	0.00161576
	Wood - Worst				n/A	82.0248	0.0107713
	ELT - Base	144.604			0.0126	144.604	2.13791e-06
	ELT - Base				3.5	144.69	0.000593864
	ELT - Base				9.3	144.832	0.00157798
	ELT - Base				22.2	145.149	0.00376679
	ELT - Best	144.714			0.0126	144.714	8.39471e-08
	ELT - Best				3.5	144.718	2.33186e-05
	ELT - Best				9.3	144.723	6.19609e-05
	ELT - Best				22.2	144.736	0.000147907
	ELT - Worst	143.949			0.0126	143.951	1.43171e-05
	ELT - Worst				3.5	144.521	0.00397697
	ELT - Worst				9.3	145.47	0.0105674
	ELT - Worst				22.2	147.58	0.0252254
	EPDM - Base	198.455			0.0126	198.456	1.55778e-06
	EPDM - Base				3.5	198.541	0.000432717
	EPDM - Base				9.3	198.683	0.00114979
	EPDM - Base				22.2	199	0.00274466
	EPDM - Best	198.567			0.0126	198.567	6.118e-08
	EPDM - Best				3.5	198.571	1.69944e-05
	EPDM - Best				9.3	198.576	4.51567e-05
	EPDM - Best				22.2	198.589	0.000107793
	EPDM - Worst	197.791			0.0126	197.793	1.04197e-05
	EPDM - Worst				3.5	198.364	0.00289437
	EPDM - Worst				9.3	199.313	0.00769075
	EPDM - Worst				22.2	201.423	0.0183586
