# Supplementary material
Source: MDPI journal article supplement (https://www.mdpi.com/2071-1050/16/8/3487)

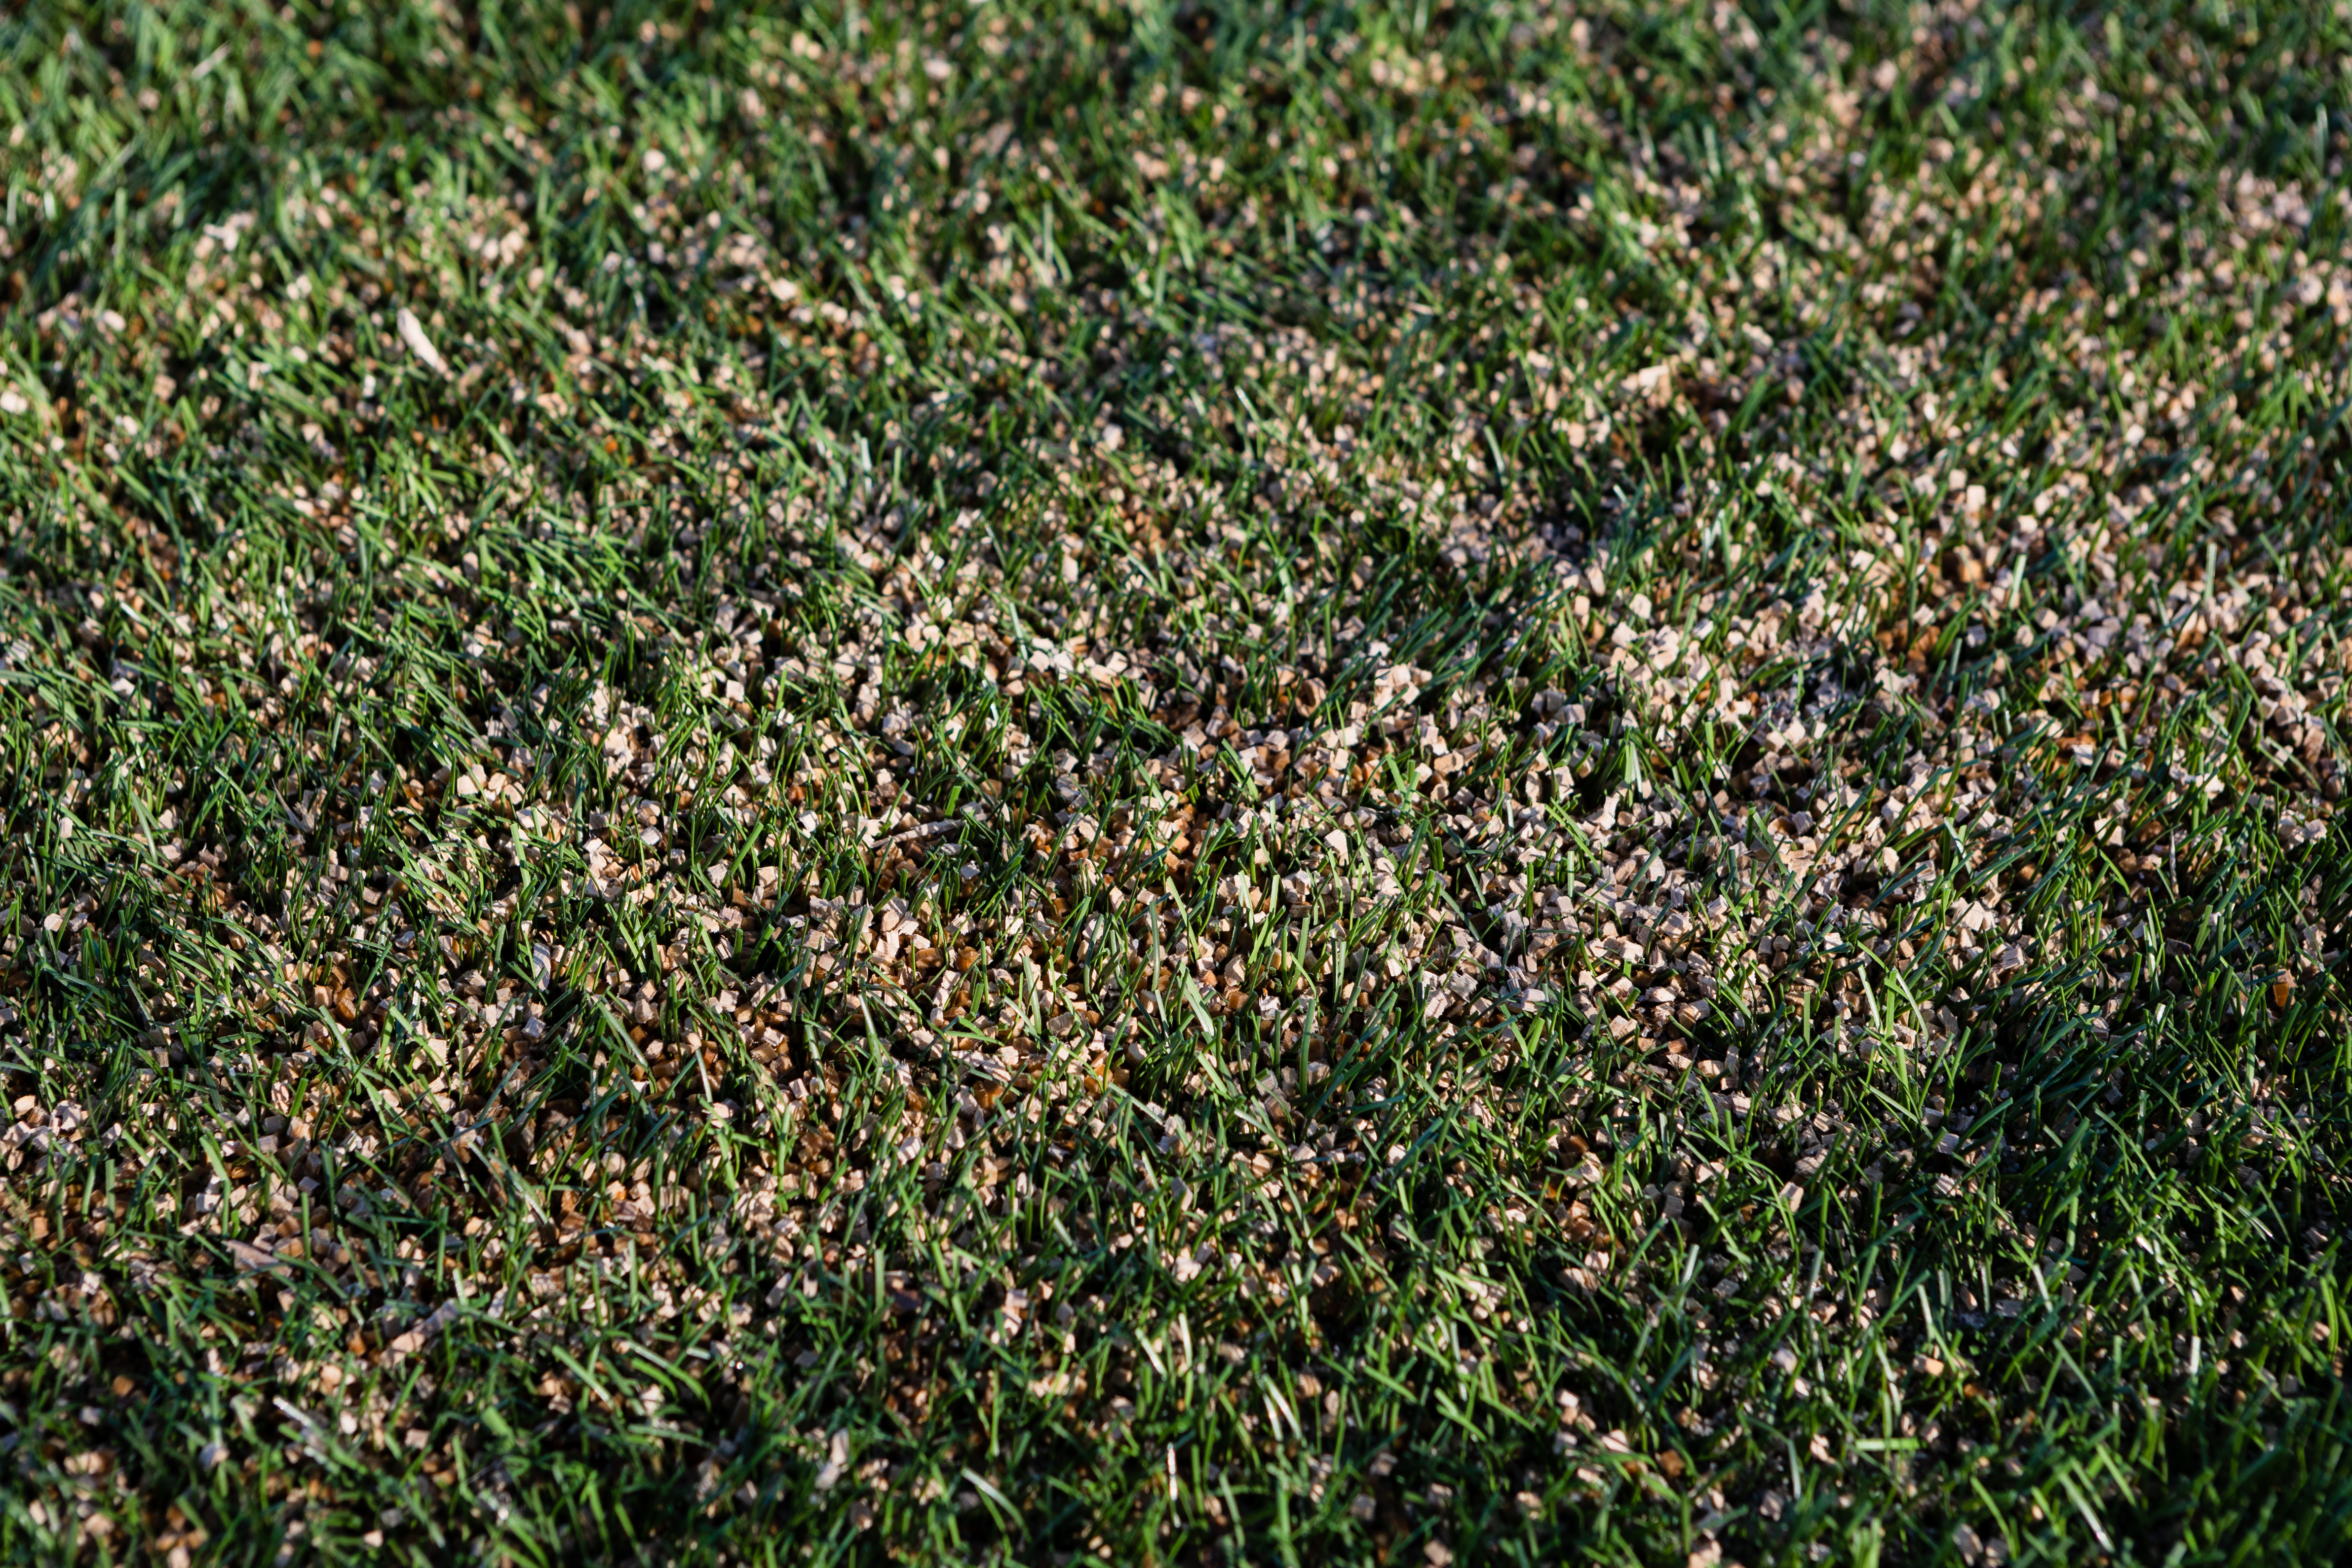

Supplement: s1 [file s1 › FigureS11.jpg]
